# Supplementary material for: TDP-43 proteinopathy in ALS is triggered by loss of ASRGL1 and associated with HML-2 expression
Source: PubMed Central journal article supplement (PMC11099023; doi:10.1038/s41467-024-48488-7), 2024-05-16

>sp|Q13148|TADBP\_HUMAN TAR DNA-binding protein 43 OS=Homo sapiens OX=9606  
GN=TARDBP PE=1 SV=1

MSEYIRVTEDE<sup>N</sup>DEPIEIPSEDDGTVLLSTVTAQFPGACGLRYRNPVSQCMRGVRLVEGILHAPDAGWGNLVYVVNY  
PKDNKRKMDETDASSAVKVKRAVQKTS<sup>N</sup>DLIVLGLPWKTTEQDLKEYFSTFGEVLMVQVKKDLKTGH<sup>N</sup>SKGFGFVRFTE  
YETQVKVMSQRHMIDGRWCDCKL<sup>N</sup>SKQSQDEPLRSRKVFVGRCTEDMTEDELREFFSQYGDVMDVFI<sup>N</sup>PKPFRAFAF  
VTFADDQIAQSLCGEDLIIKGISVHIS<sup>N</sup>AEPKH<sup>N</sup>SNRQLERSGRFGGNPPGGFGN<sup>N</sup>QGGFG<sup>N</sup>SRGGGAGLG<sup>N</sup>NOGS<sup>N</sup>MG  
GGMNFGAFSINPAMMAAAQAALQSSWGMMLASQON<sup>N</sup>QSGPSG<sup>N</sup>Q<sup>N</sup>QGN<sup>N</sup>MQREPN<sup>N</sup>QAFGS<sup>N</sup>SYSGS<sup>N</sup>SGAAIGW  
GSASNAGSGSGFN<sup>N</sup>GGFGSSMDSKSSGWGM

5MRG, 4BS2, 6N3C, 6N3A, 5WIA, 5WIQ

MSEYIRVTEDE<sup>N</sup>DEPIEIPSEDDGTVLLSTVTAQFPGACGLRYRNPVSQCMRGVRLVEGILH  
APDAGWGNLVYVVNYPKDNKRKMDETDASSAVKVKRAVQKTS<sup>N</sup>DLIVLGLPWKTTEQDLKEYF  
STFGEVLMVQVKKDLKTGH<sup>N</sup>SKGFGFVRFTEYETQVKVMSQRHMIDGRWCDCKL<sup>N</sup>SKQSQDE  
PLRSRKVFVGRCTEDMTEDELREFFSQYGDVMDVFI<sup>N</sup>PKPFRAFAFVTFADDQIAQSLCGEDL  
IIKGISVHIS<sup>N</sup>AEPKH<sup>N</sup>SNRQLERSGRFGGNPPGGFGN<sup>N</sup>QGGFG<sup>N</sup>SRGGGAGLG<sup>N</sup>NOGS<sup>N</sup>MG  
MNF<sup>N</sup>FGAFSINPAMMAAAQAALQSSWGMMLASQON<sup>N</sup>QSGPSG<sup>N</sup>Q<sup>N</sup>QGN<sup>N</sup>MQREPN<sup>N</sup>QAFGS<sup>N</sup>SYSGS<sup>N</sup>  
SYSGS<sup>N</sup>SGAAIGWGSASNAGSGSGFN<sup>N</sup>GGFGSSMDSKSSGWGM

MSEYIRVTEDENDEPIEIPSEDDGTVLLSTVTAQ  
FPGACGLRYRNPVSQCMRGVRLVEGILHAPDAGW  
GNLVYVVNYPKDNKRKMDETDASSAVKVKRAVQ

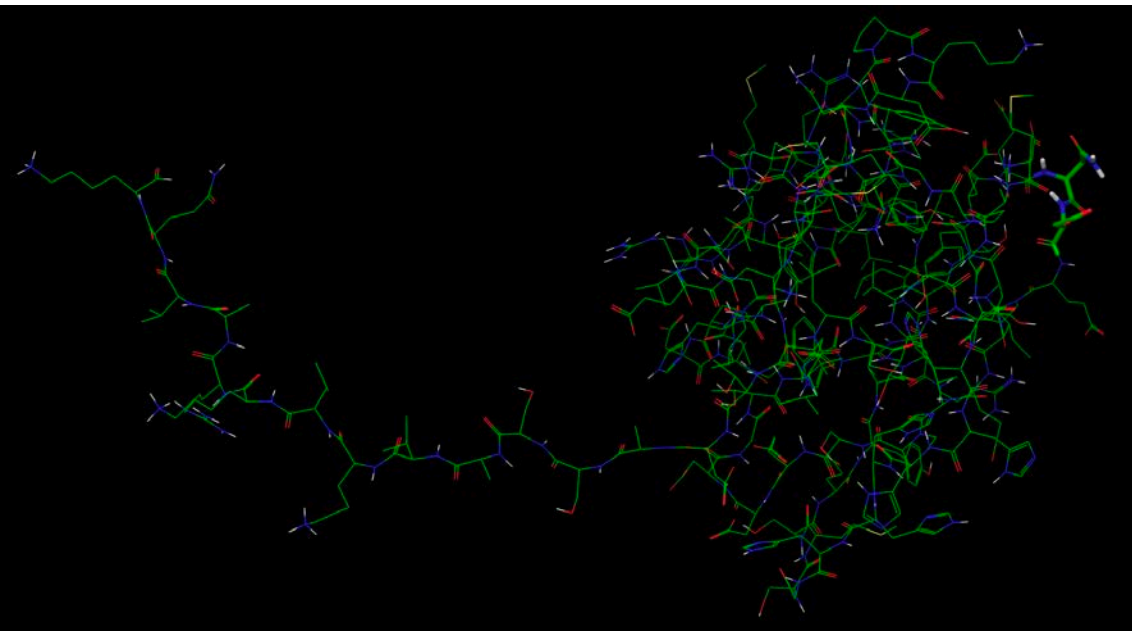

**5MRG: -4021.2**

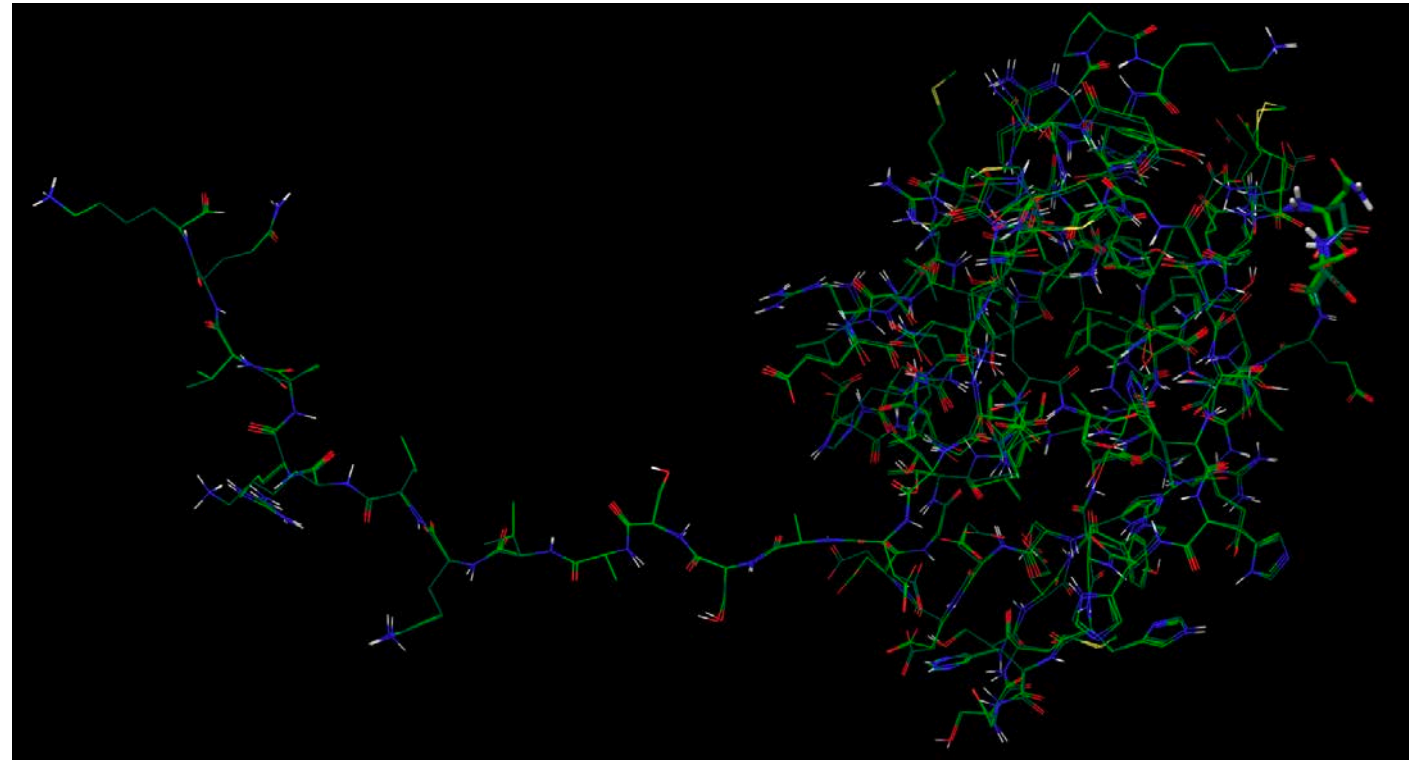

**5MRG with isoaspartate24: -3997.5**

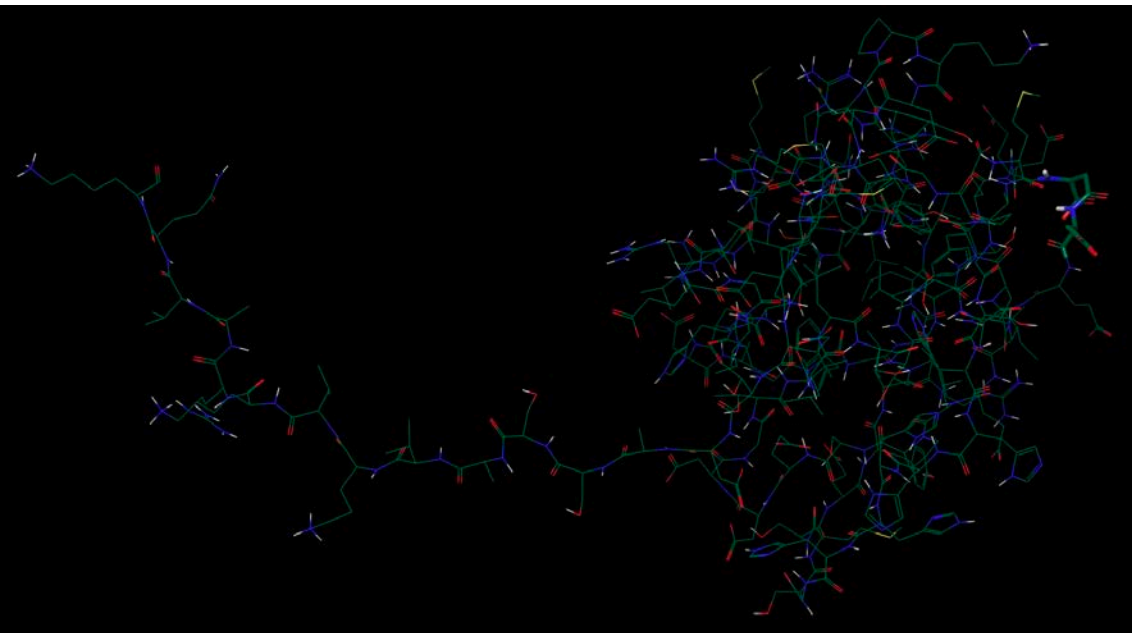

MSEYIRVTEDENDEPIEIPSEDDGTVLLSTVTAQ  
FPGACGLRYRNPVSQCMRGVRLVEGILHAPDAGW  
GNLVYVVNYPKDNKRKMDETDASSAVKVKRAVQ

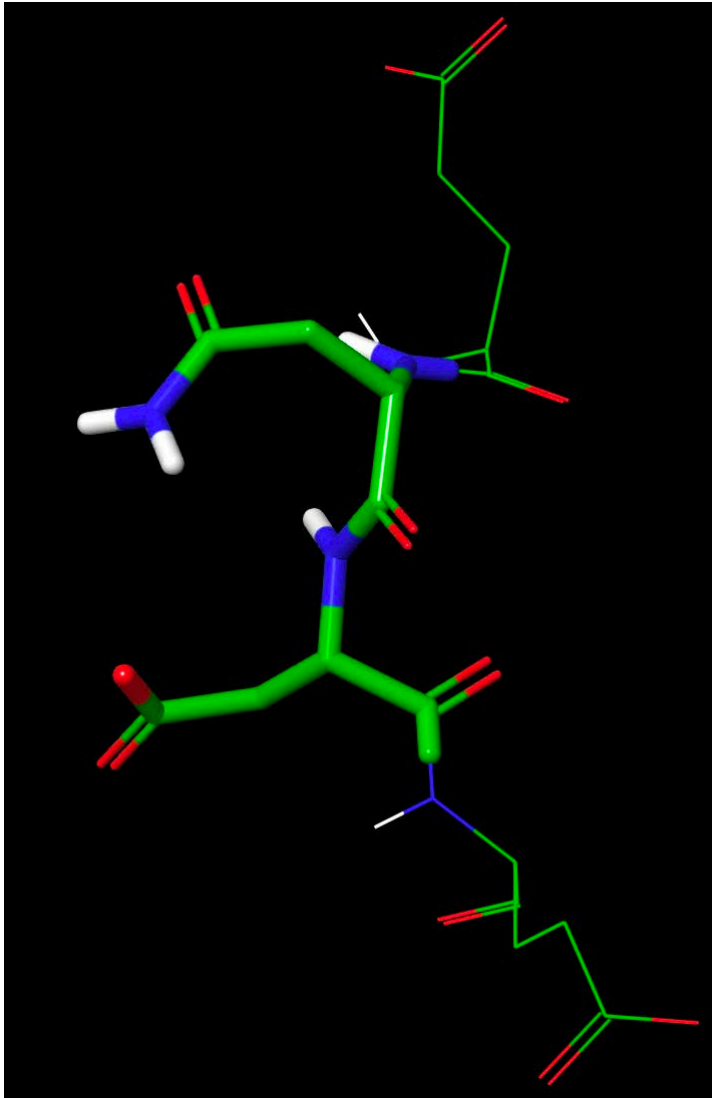

5MRG: -4021.2

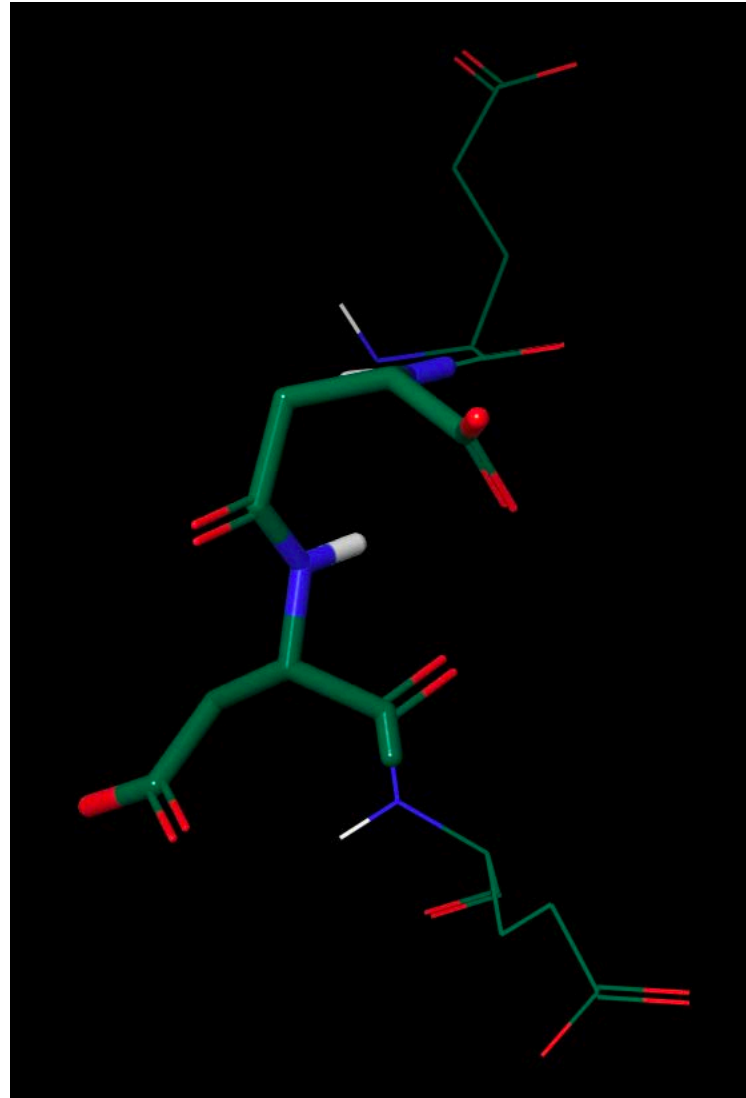

5MRG with isoaspartate24: -3997.5

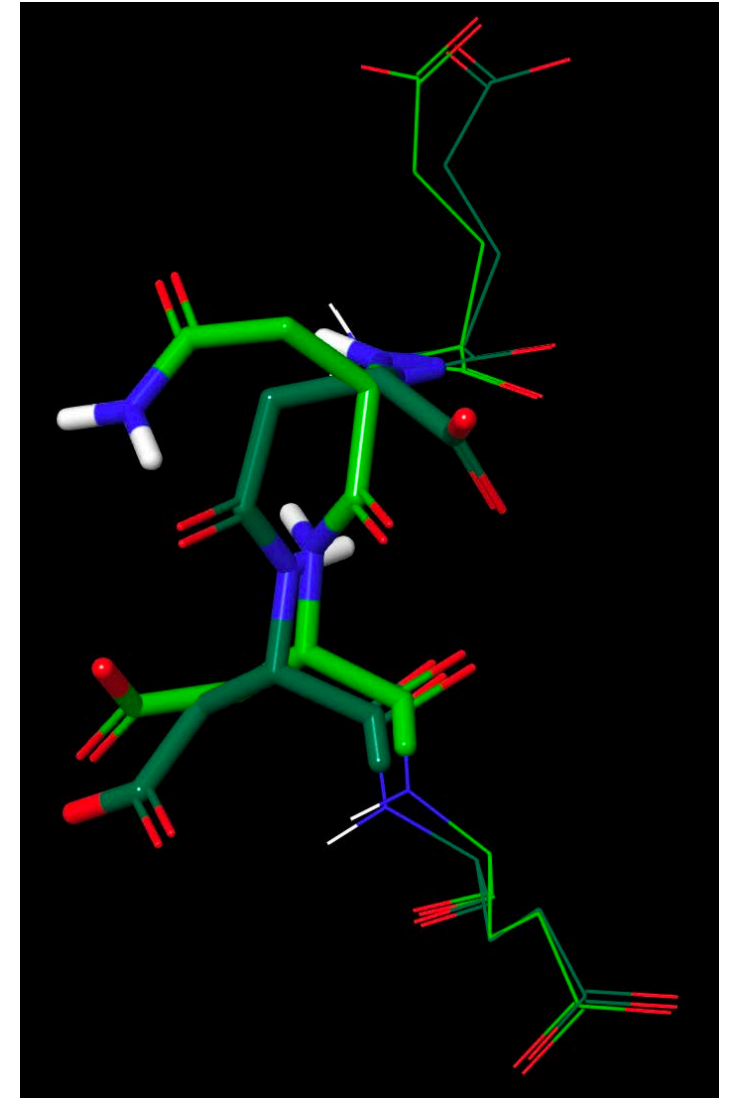

4BS2 all sites highlighted  
(179and265and259) : -8531.4  
(RNA in yellow)

```
KTSDLIVLGLPWKTTEQDLKEYFSTFGE  
VLMVQVKKDLKTGHSKGFVRFTEYET  
QVKVMSQRHMIDGRWCDCKLPNSKQSQD  
EPLRSRKVFVGRCTEDMTEDELREFFSQ  
YGDVMDVFI PKPFAFAFVTFADDQIAQ  
SLCGEDLIIKGISVHISNAEPKHNSNRQ
```

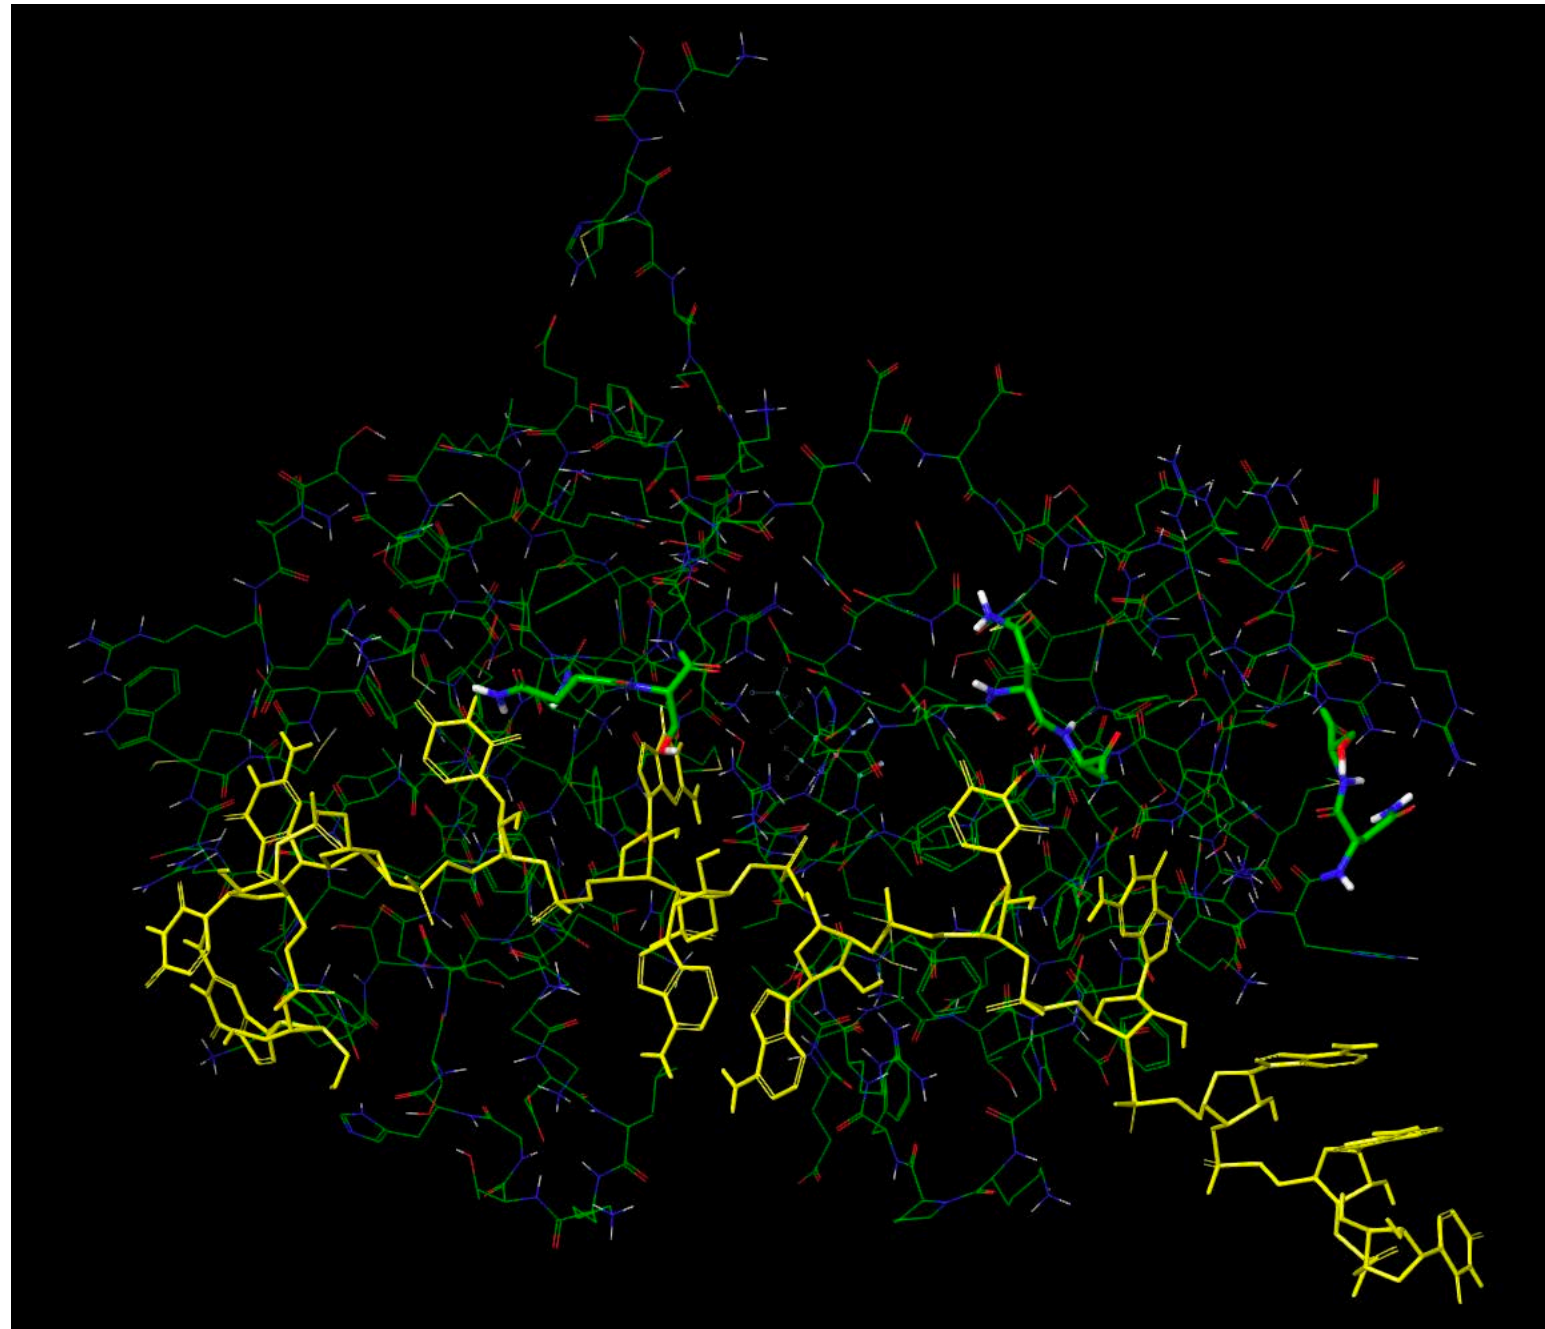

4BS2 Isoaspart\_179and265and259: -8273.9

```
KTSDLIVLGLPWKTTEQDLKEYFSTFGE  
VLMVQVKKDLKTGHSKGFGFVRFTEYET  
QVKVMSQRHMIDGRWCDCKLPNSKQSQD  
EPLRSRKVFVGRCTEDMTEDELREFFSQ  
YGDVMDVFI PKPFRAFAFVTFADDQIAQ  
SLCGEDLI IKGISVHISNAEPKHNSNRQ
```

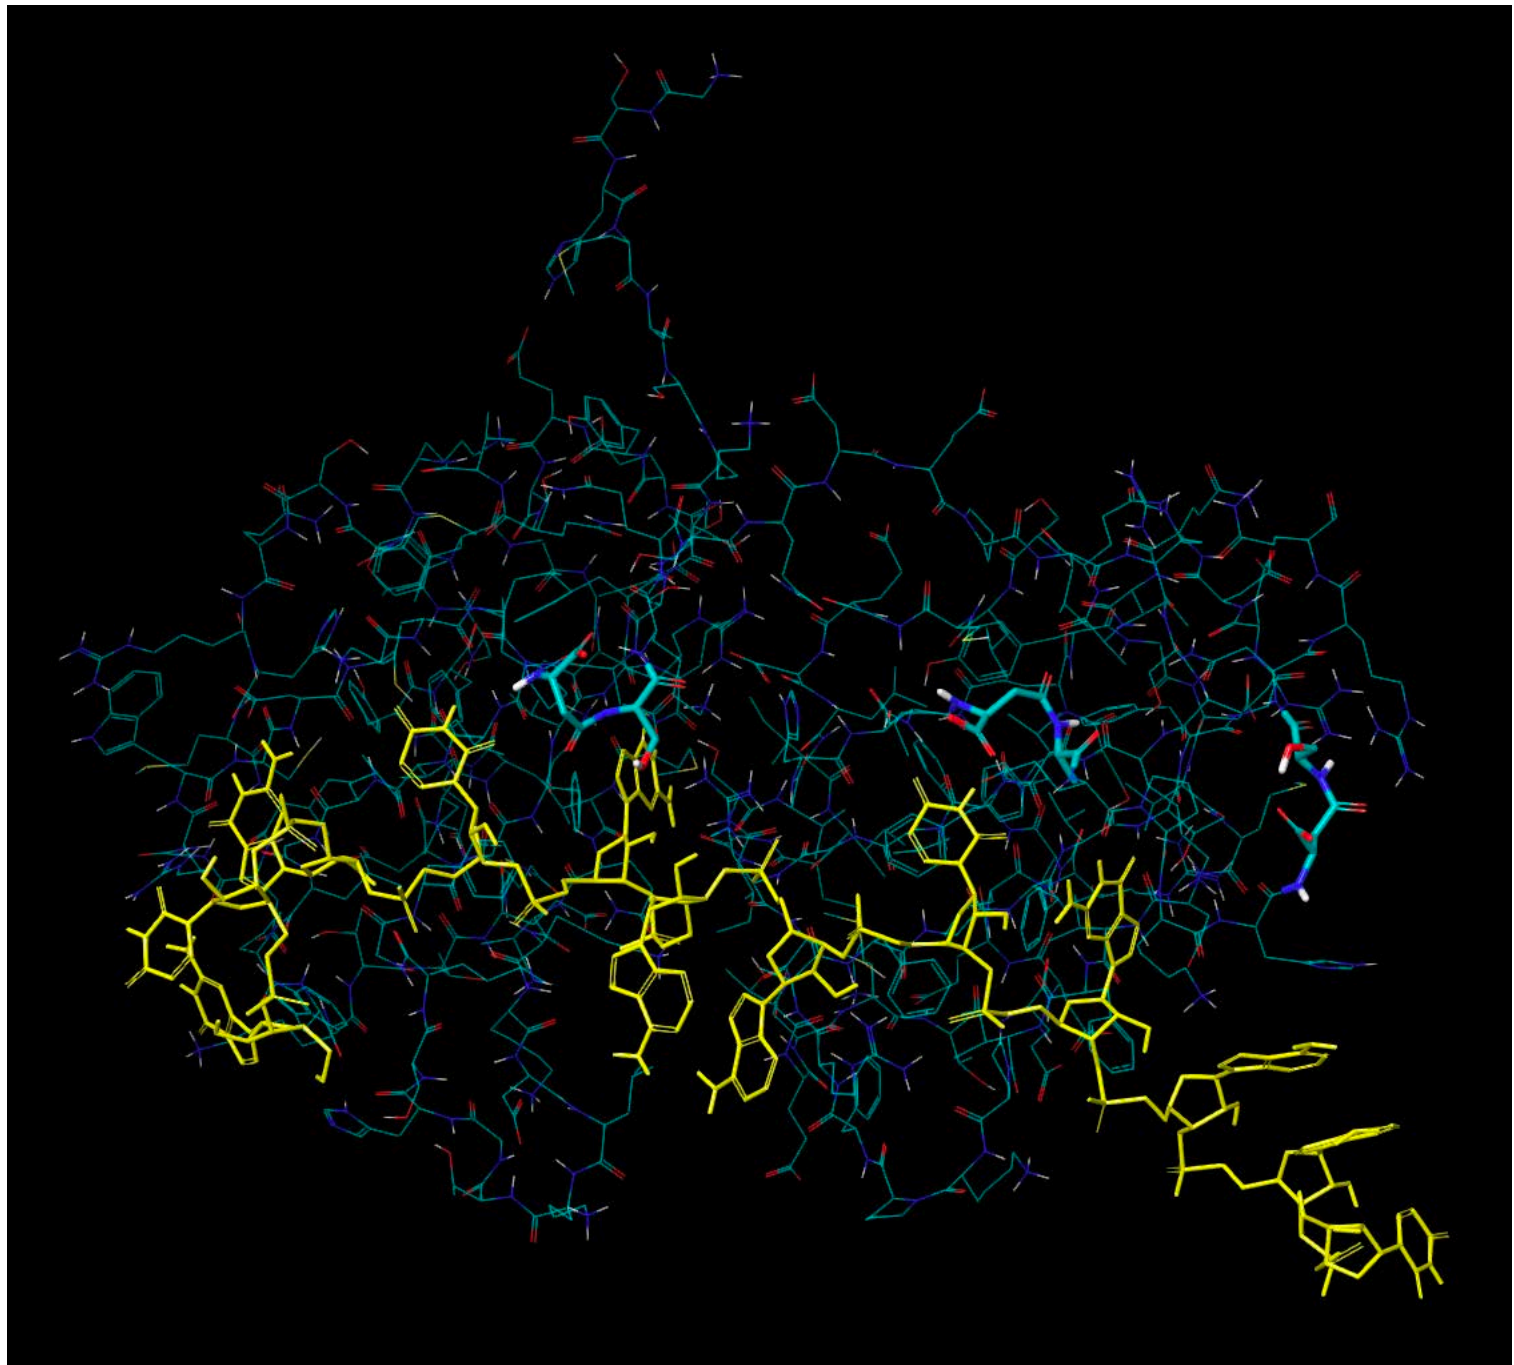

## 4BS2\_179and265and259 : overlay

```
KTSDLIVLGLPWKTTEQDLKEYFSTFGE  
VLMVQVKKDLKTGHSKGFGFVRFTEYET  
QVKVMSQRHMIDGRWCDCKLPNSKQSQD  
EPLRSRKVFVGRCTEDMTEDELREFFSQ  
YGDVMDVFI PKPFRAFAFVTFADDQIAQ  
SLCGEDLI IKGISVHISNAEPKHNSNRQ
```

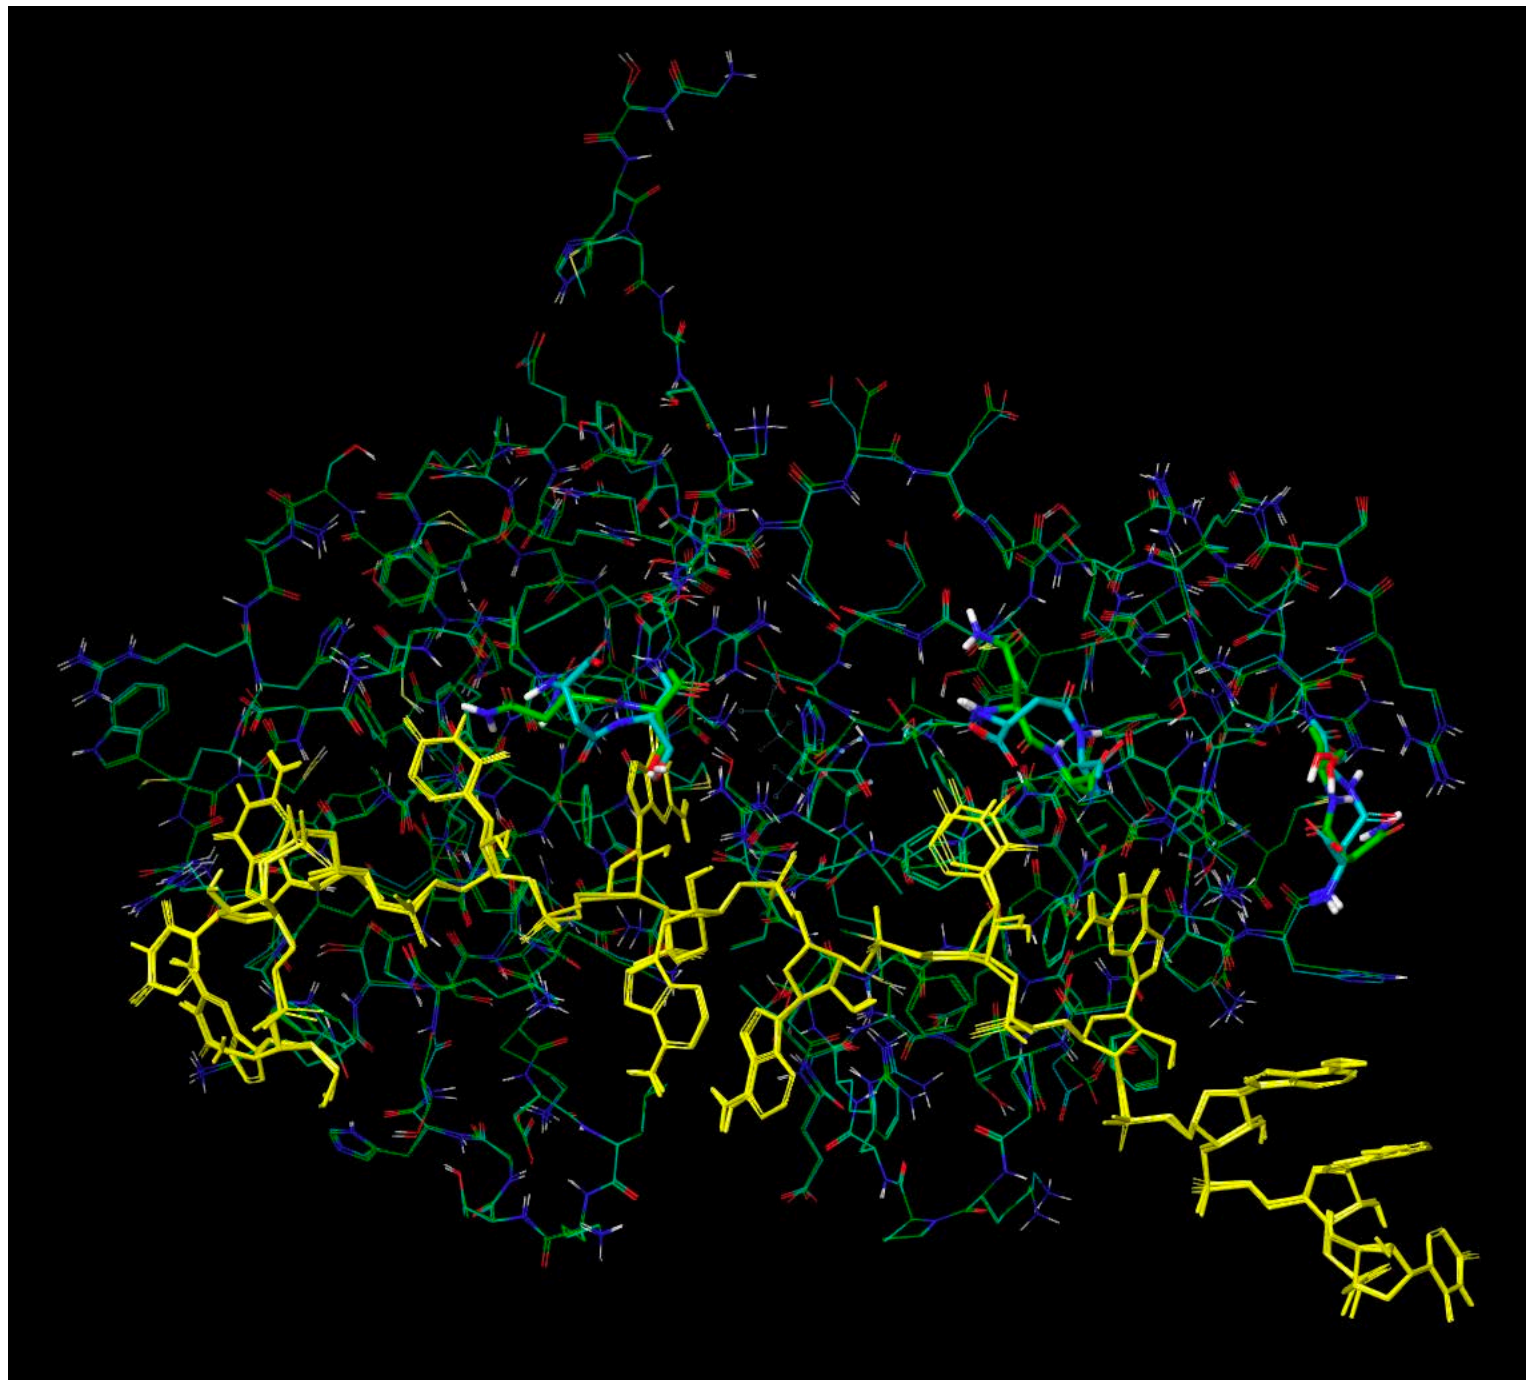

4BS2 Isoaspart\_179: -8193.9

overlay

4BS2: -8531.4

```
KTSDLIVLGLPWKTTEQDLKEYFSTFGE  
VLMVQVKKDLKTGHSKGFGFVRFTEYET  
QVKVMSQRHMIDGRWCDCKLPNSKQSQD  
EPLRSRKVFVGRCTEDMTEDELREFFSQ  
YGDVMDVFI PKPFRAFAFVTFADDQIAQ  
SLCGEDLI IKGISVHISNAEPKHNSNRQ
```

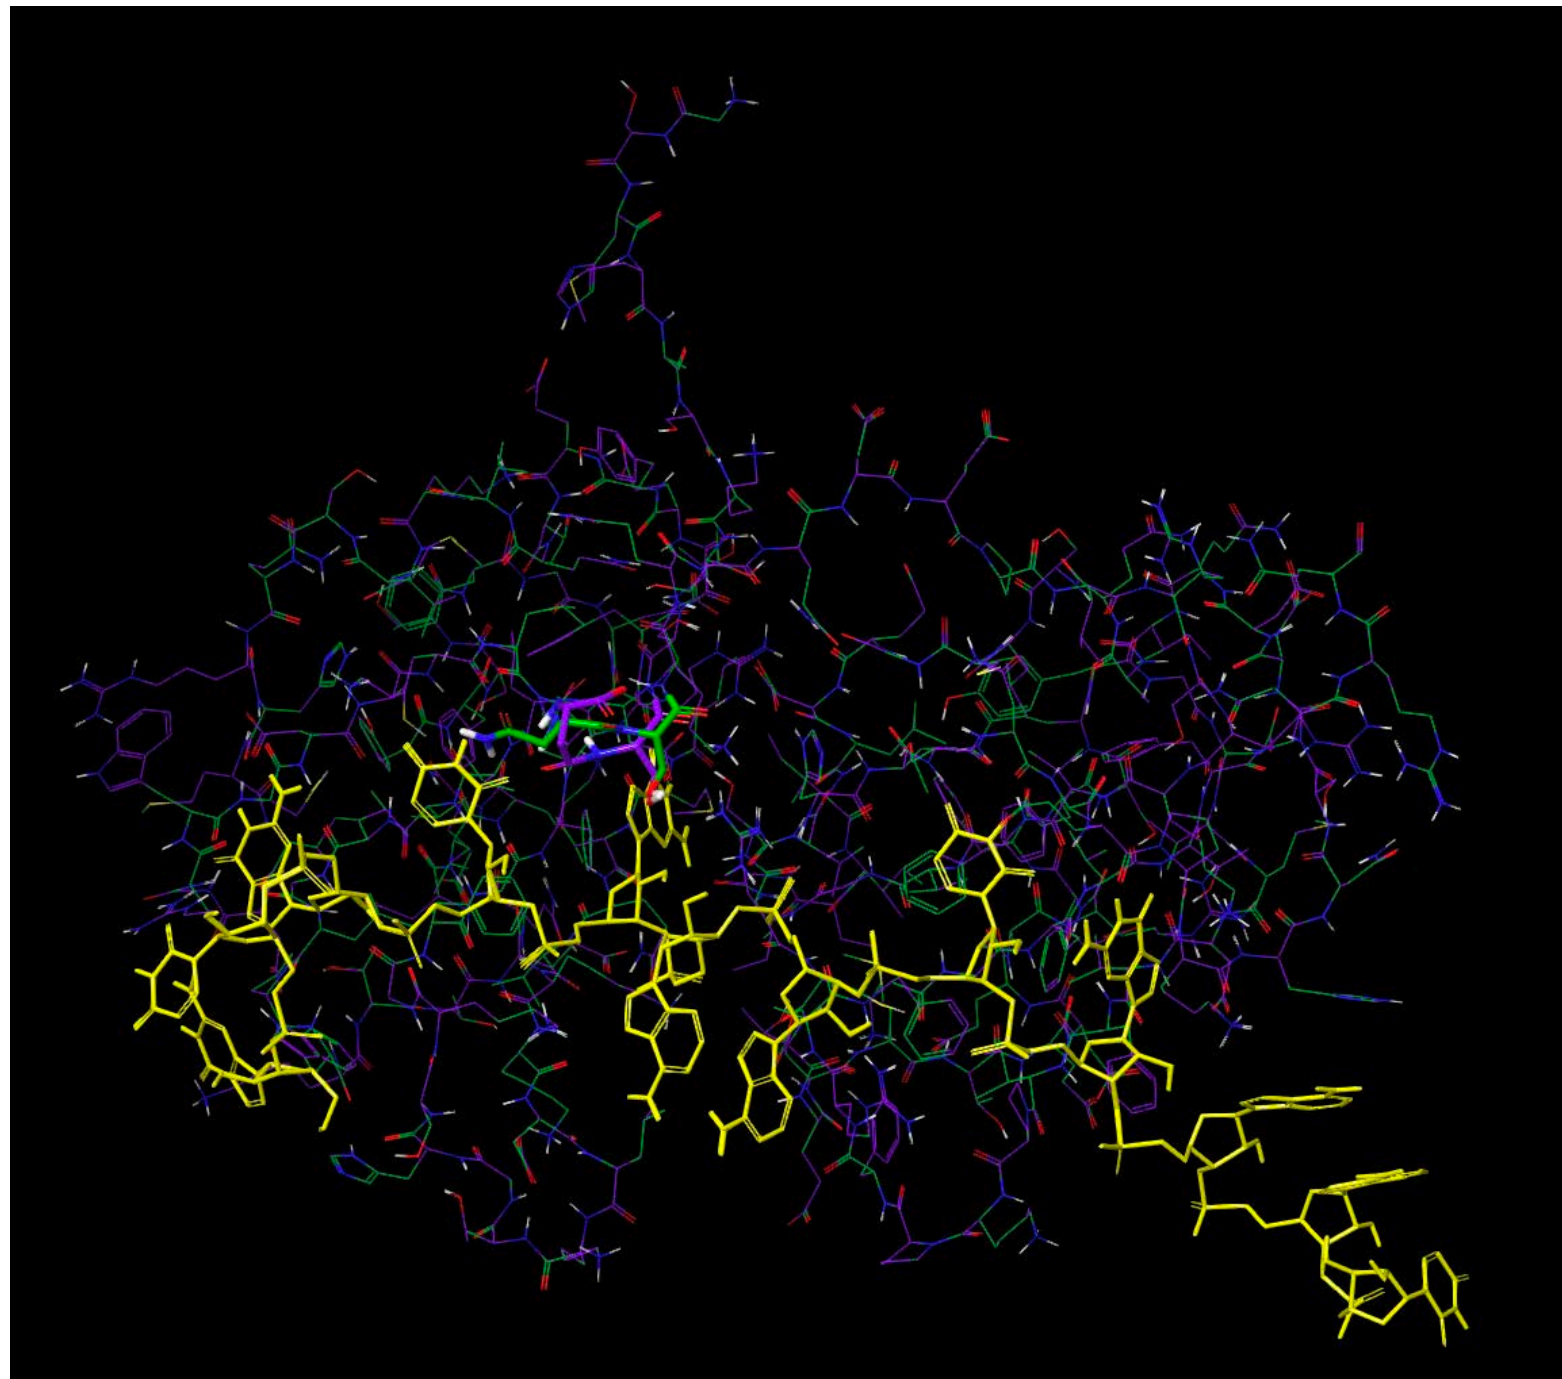

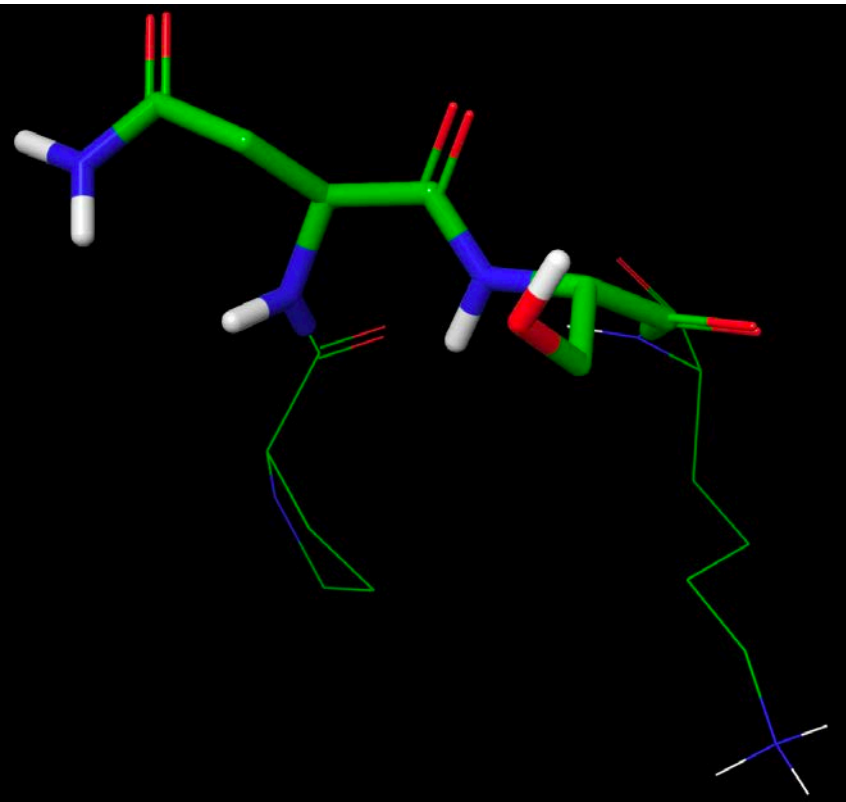

4BS2: -8531.4

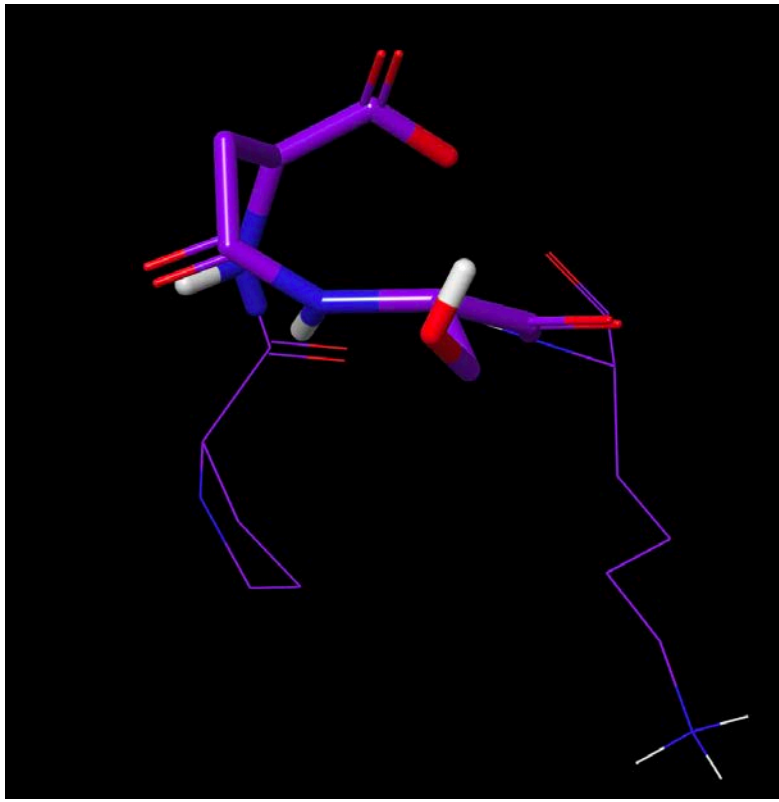

4BS2 Isoaspart\_179: -8193.9

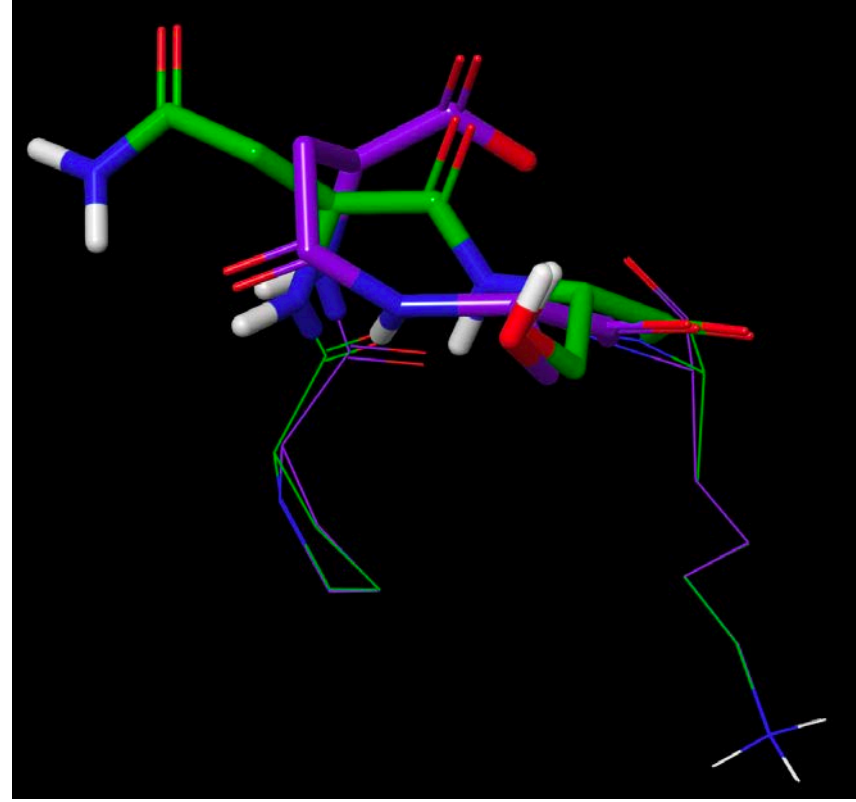



4BS2 isoaspart 259: -8438.4

overlay

4BS2: -8531.4

```
KTSDLIVLGLPWKTTEQDLKEYFSTFGE  
VLMVQVKKDLKTGHSKGFGFVRFTEYET  
QVKVMSQRHMIDGRWCDCKLPNSKQSQD  
EPLRSRKVFVGRCTEDMTEDELREFFSQ  
YGDVMDVFI PKPFRAFAFVTFADDQIAQ  
SLCGEDLI IKGISVHISNAEPKHNSNRQ
```

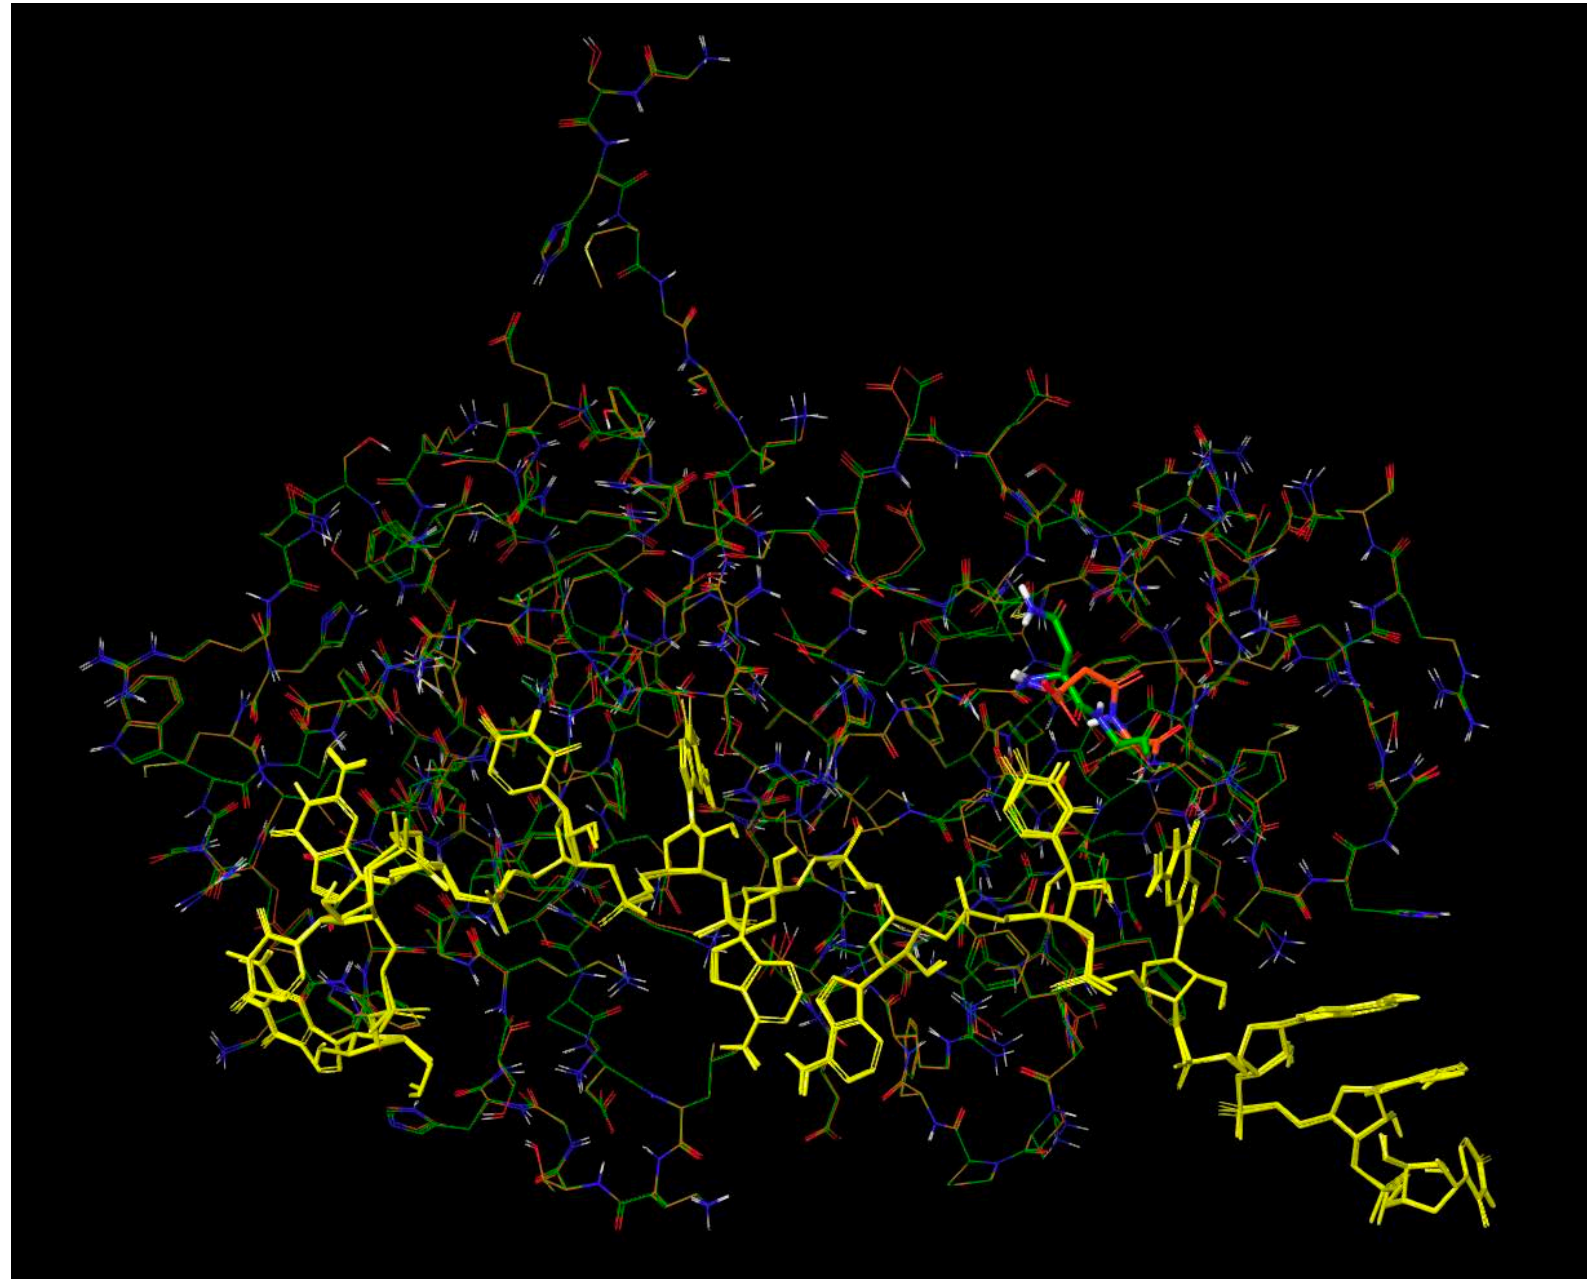

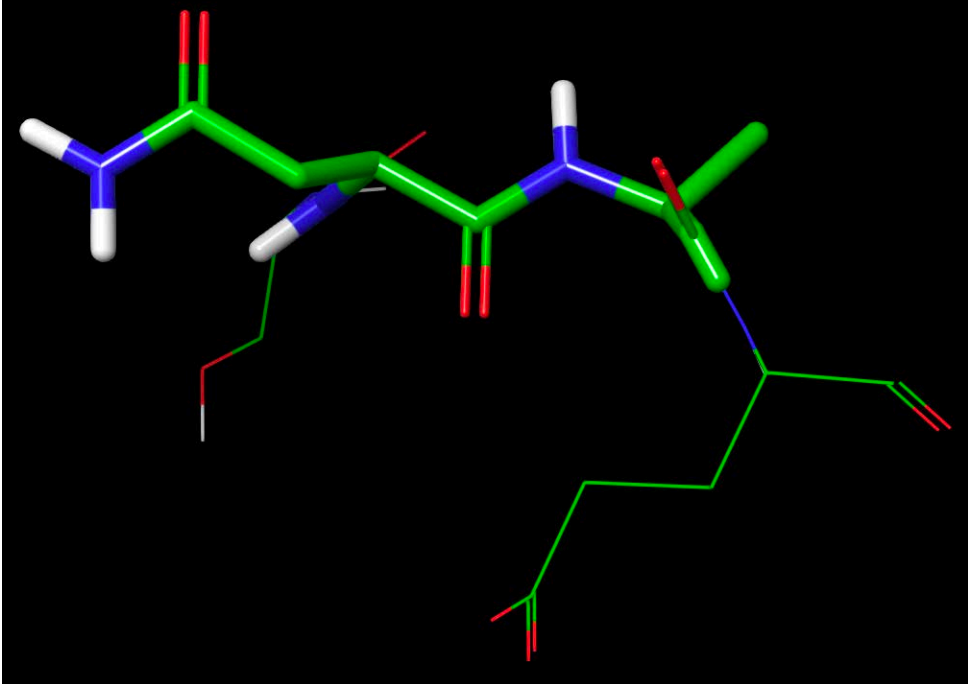

4BS2: -8531.4

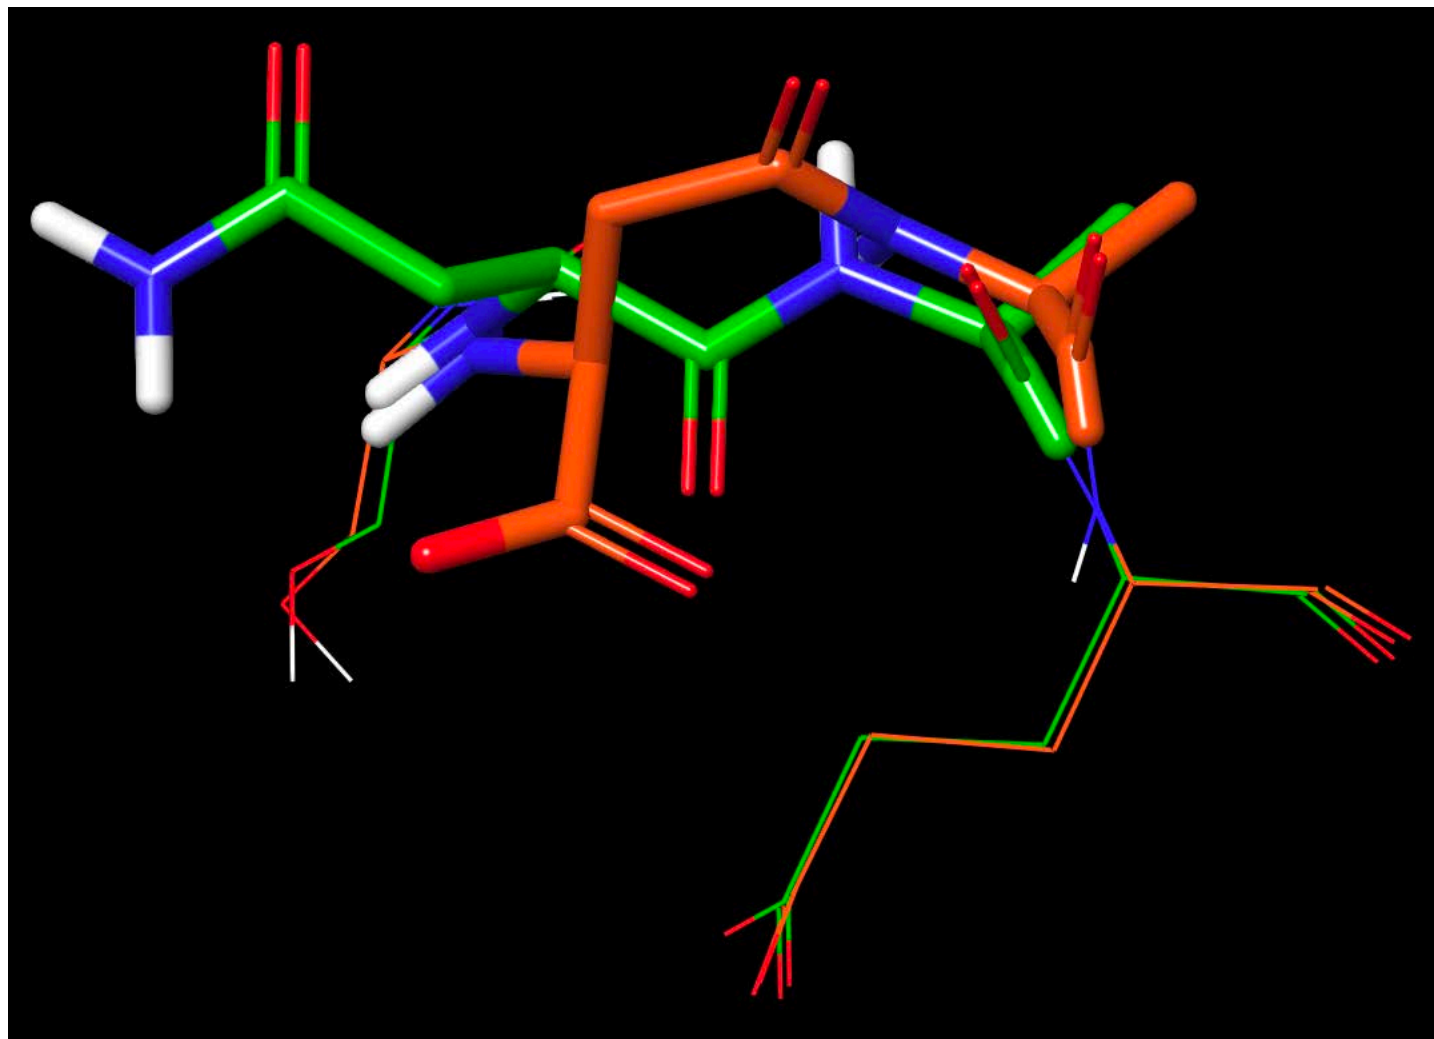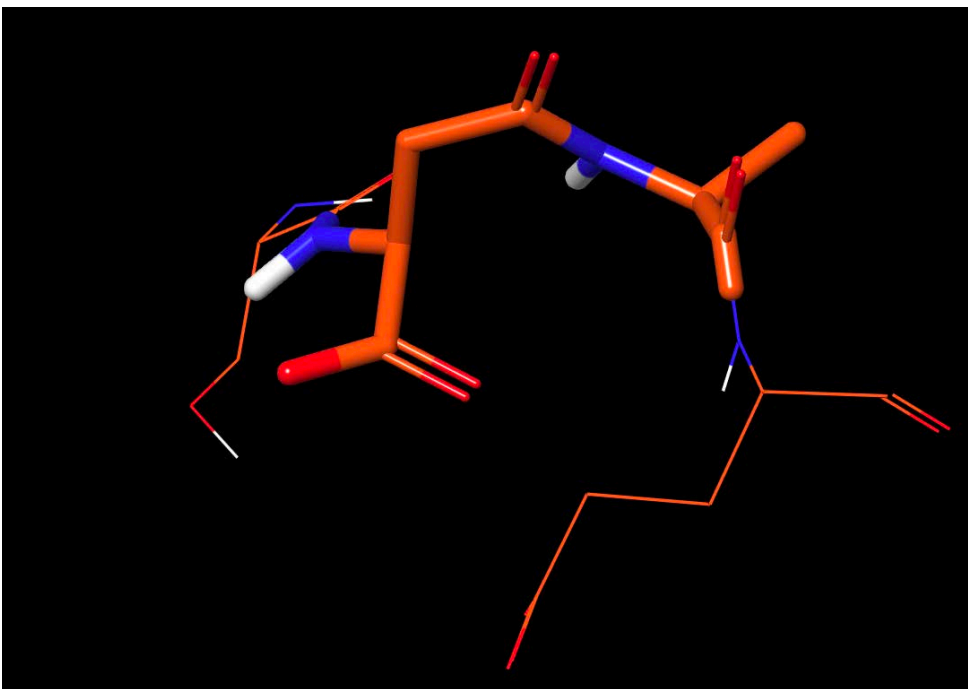

4BS2 isoaspart 259: -8438.4

4BS2 Isoaspart\_265: -8439.7

Overlay

4BS2: -8531.4

```
KTSDLIVLGLPWKTTEQDLKEYFSTFGE  
VLMVQVKKDLKTGHSKGFGFVRFTEYET  
QVKVMSQRHMIDGRWCDCKLPNSKQSQD  
EPLRSRKVFVGRCTEDMTEDELREFFSQ  
YGDVMDVFI PKPFRAFAFVTFADDQIAQ  
SLCGEDLI IKGISVHISNAEPKHNSNRQ
```

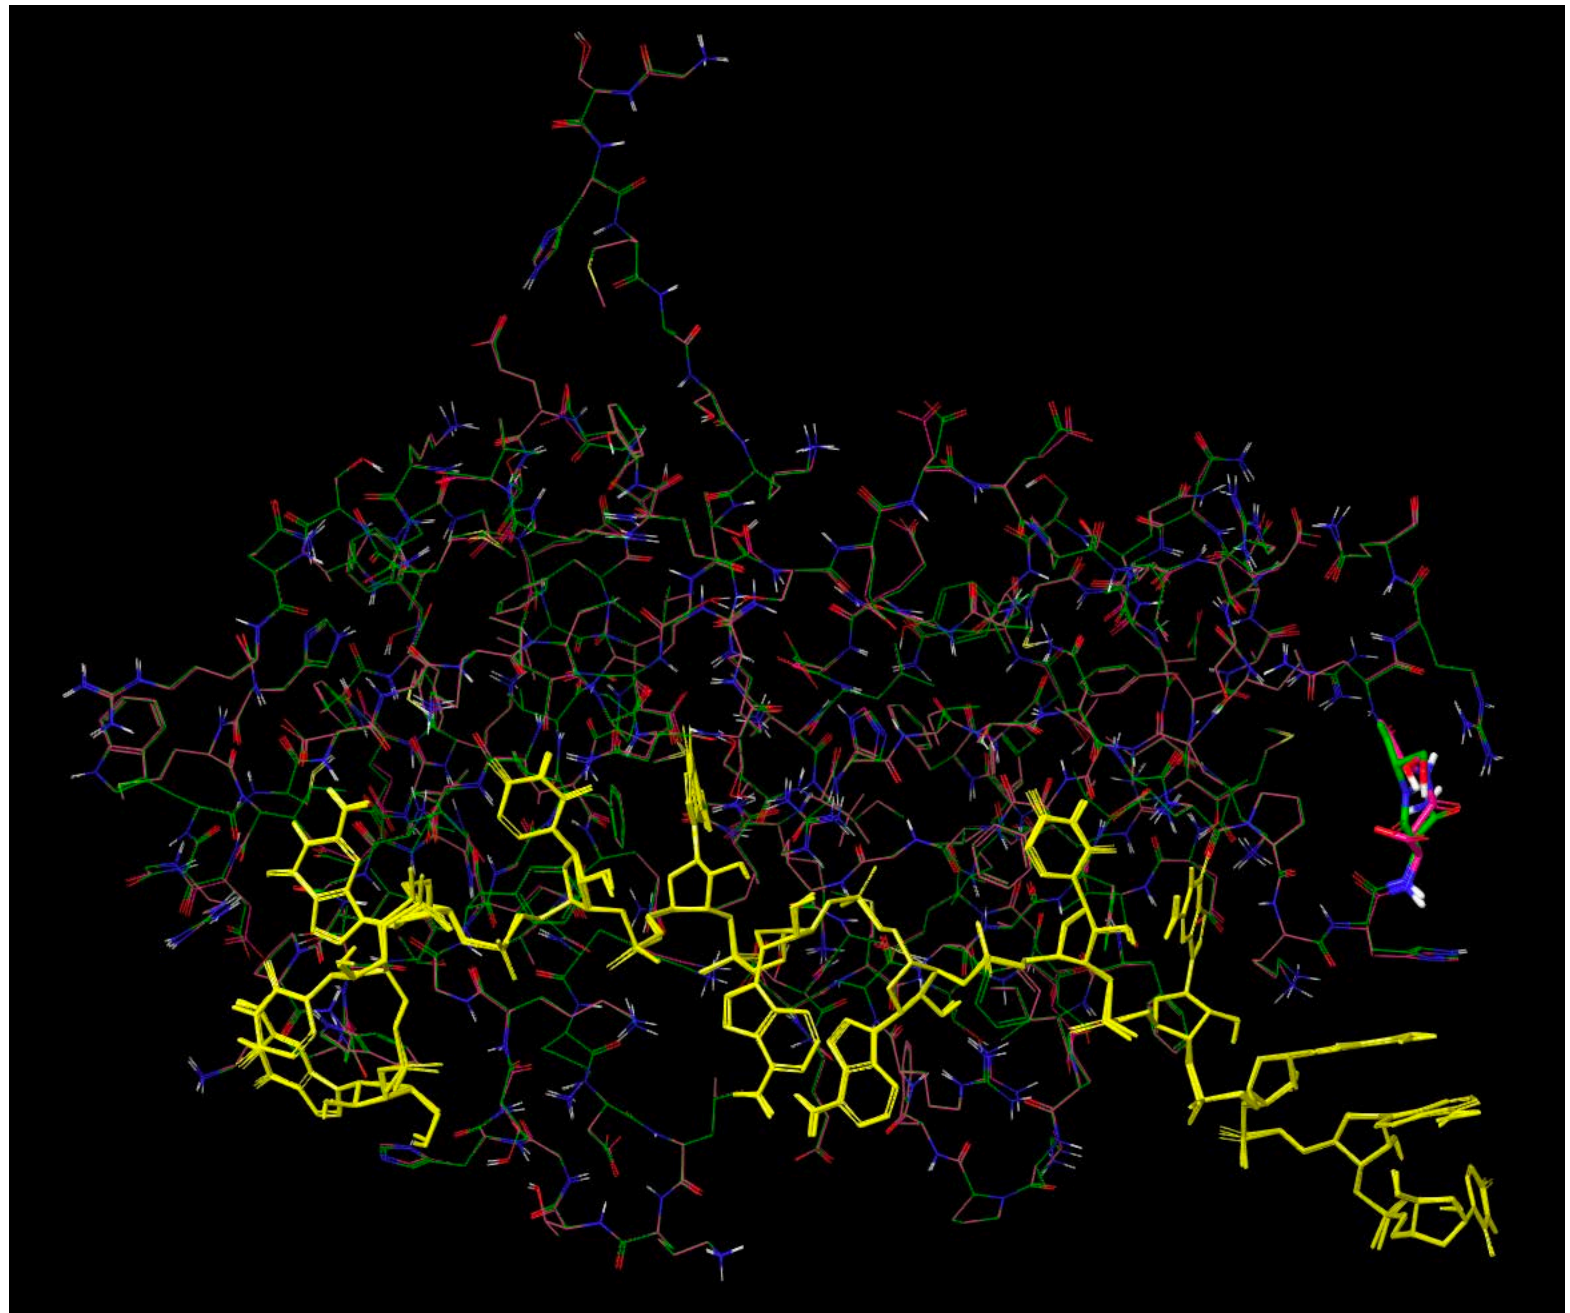

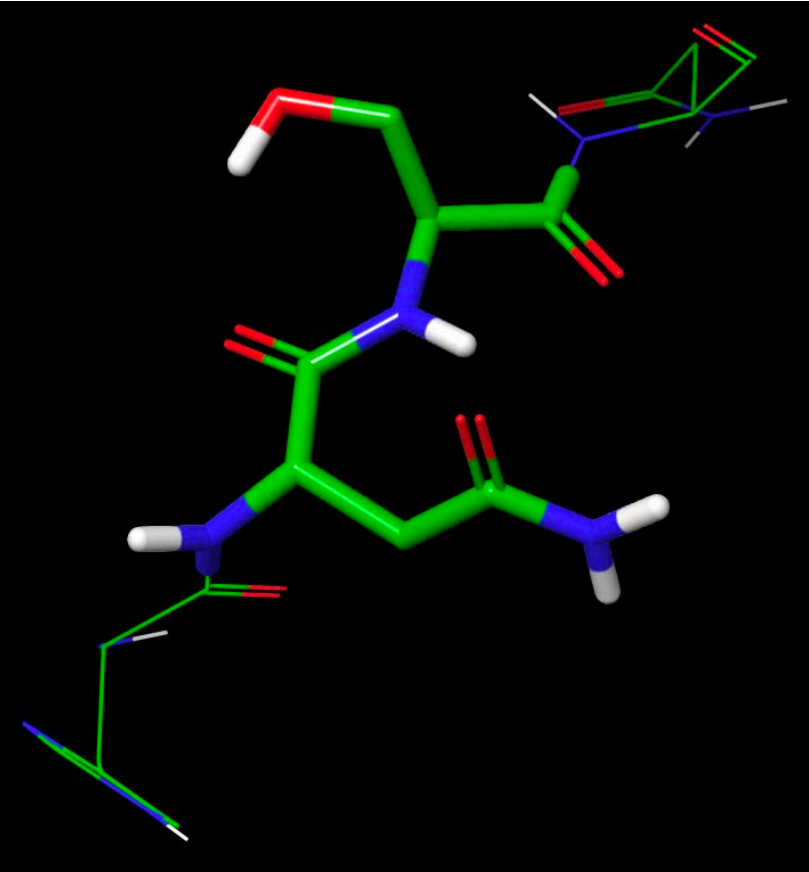

4BS2: -8531.4

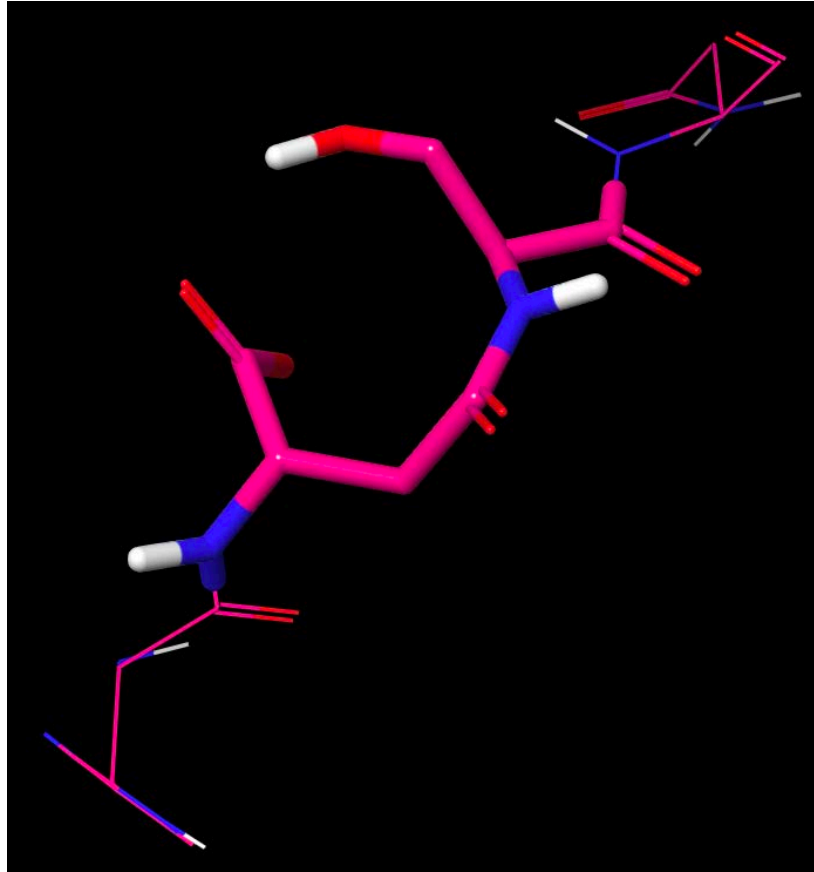

4BS2 Isoaspart\_265: -8439.7

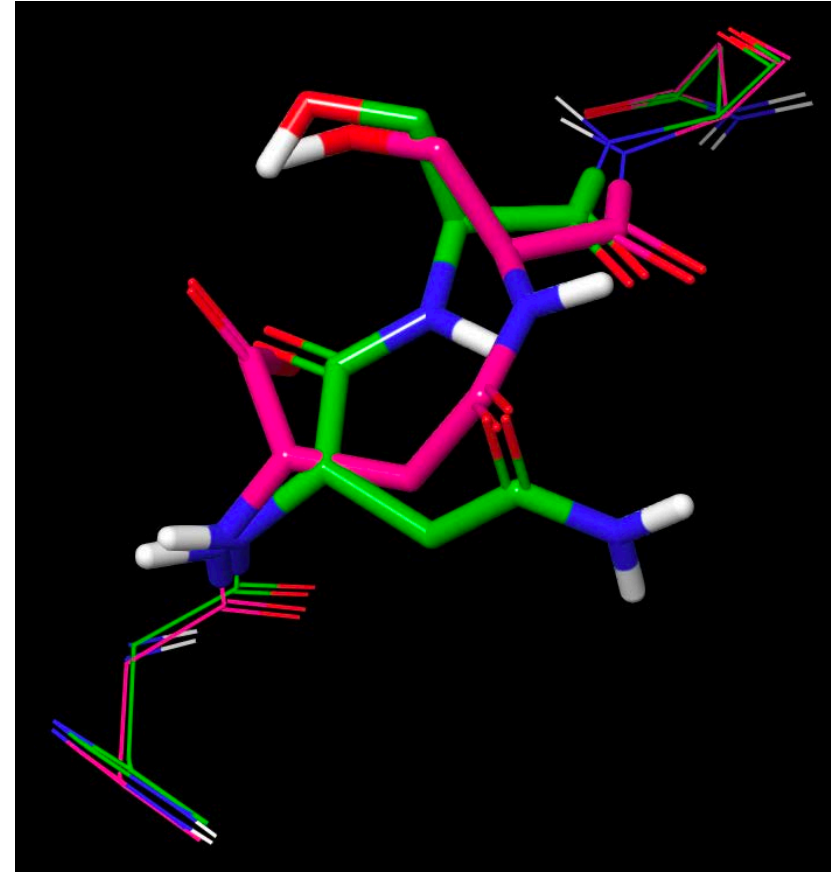

4BS2 Isoaspart\_179and265: -8290.6

```
KTSDLIVLGLPWKTTEQDLKEYFSTFGE  
VLMVQVKKDLKTGHSKGFGFVRFTEYET  
QVKVMSQRHMIDGRWCDCKLPNSKQSQD  
EPLRSRKVFVGRCTEDMTEDELREFFSQ  
YGDVMDVFI PKPFRAFAFVTFADDQIAQ  
SLCGEDLI IKGISVHISNAEPKHNSNRQ
```

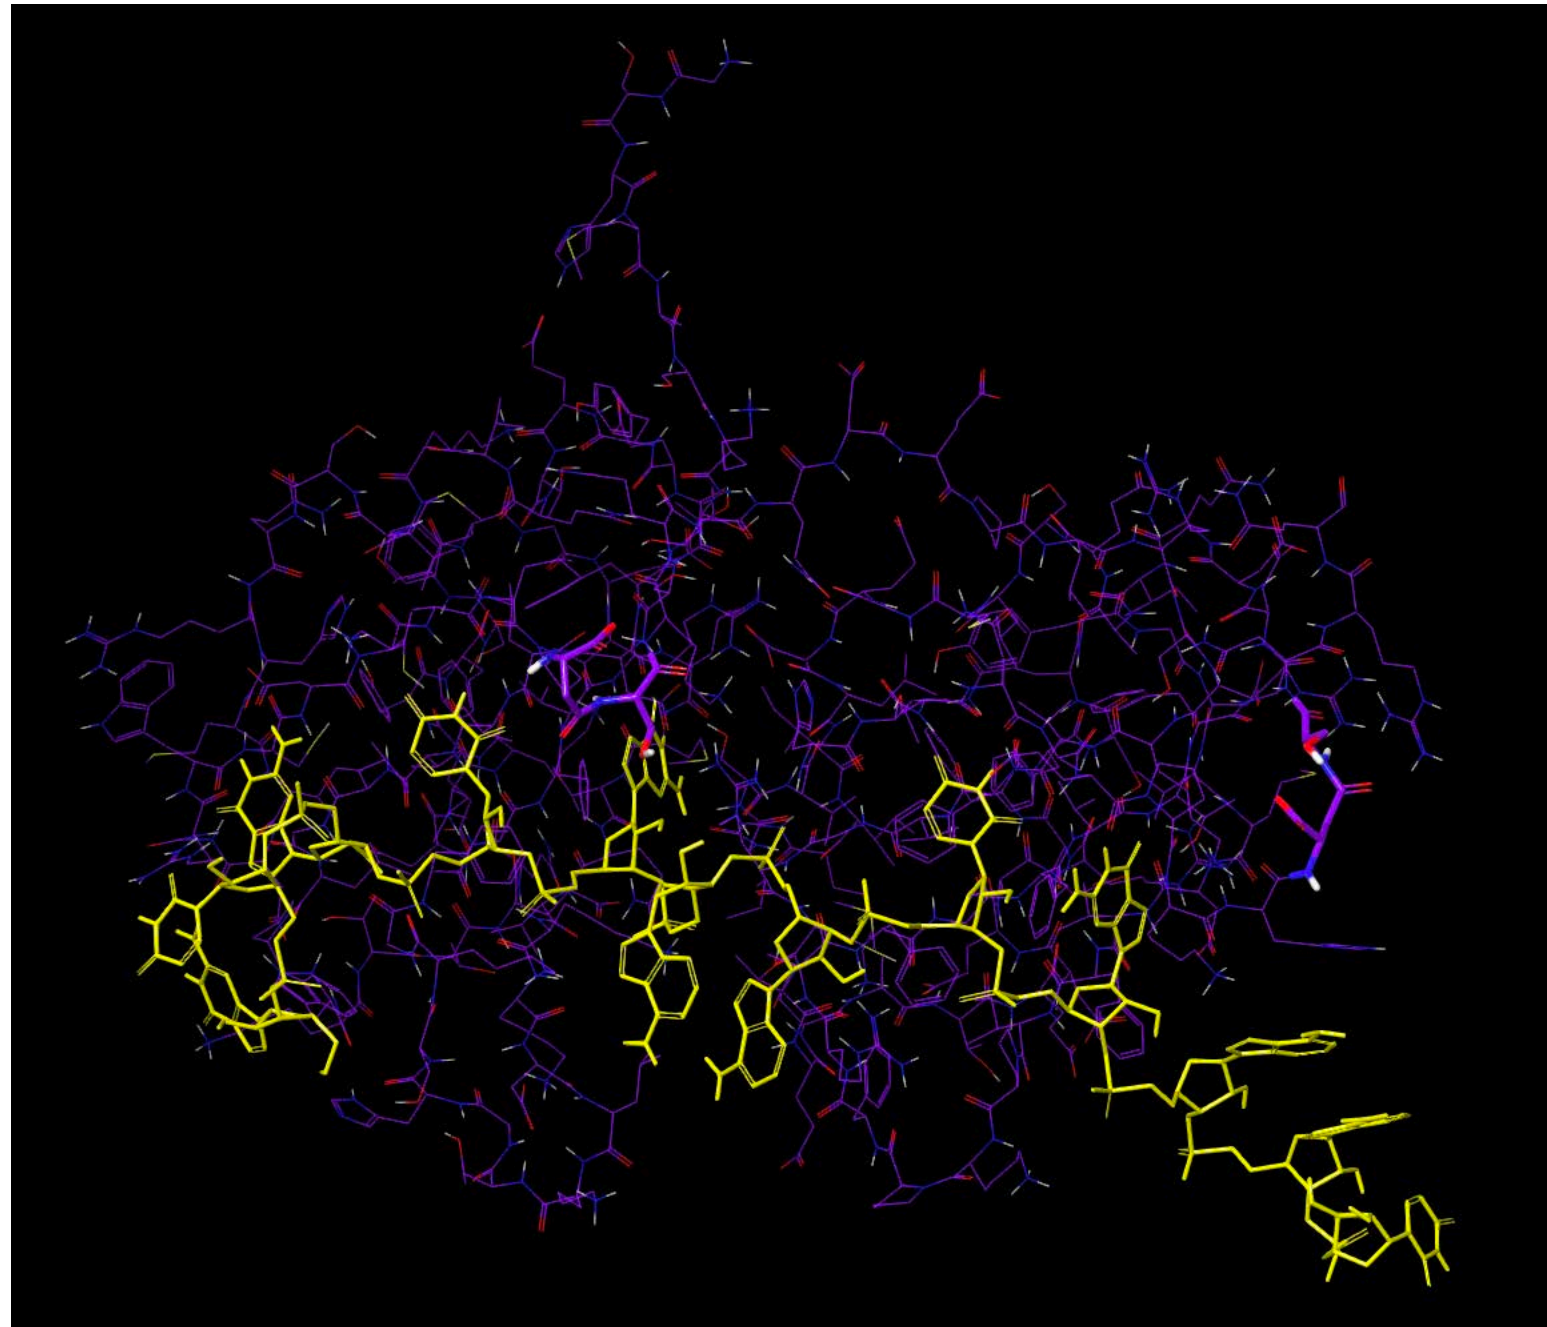

GFGNSRGGGAGLGNNQGSNMGGGMNFGEFSIN

6N3C: -1064.5

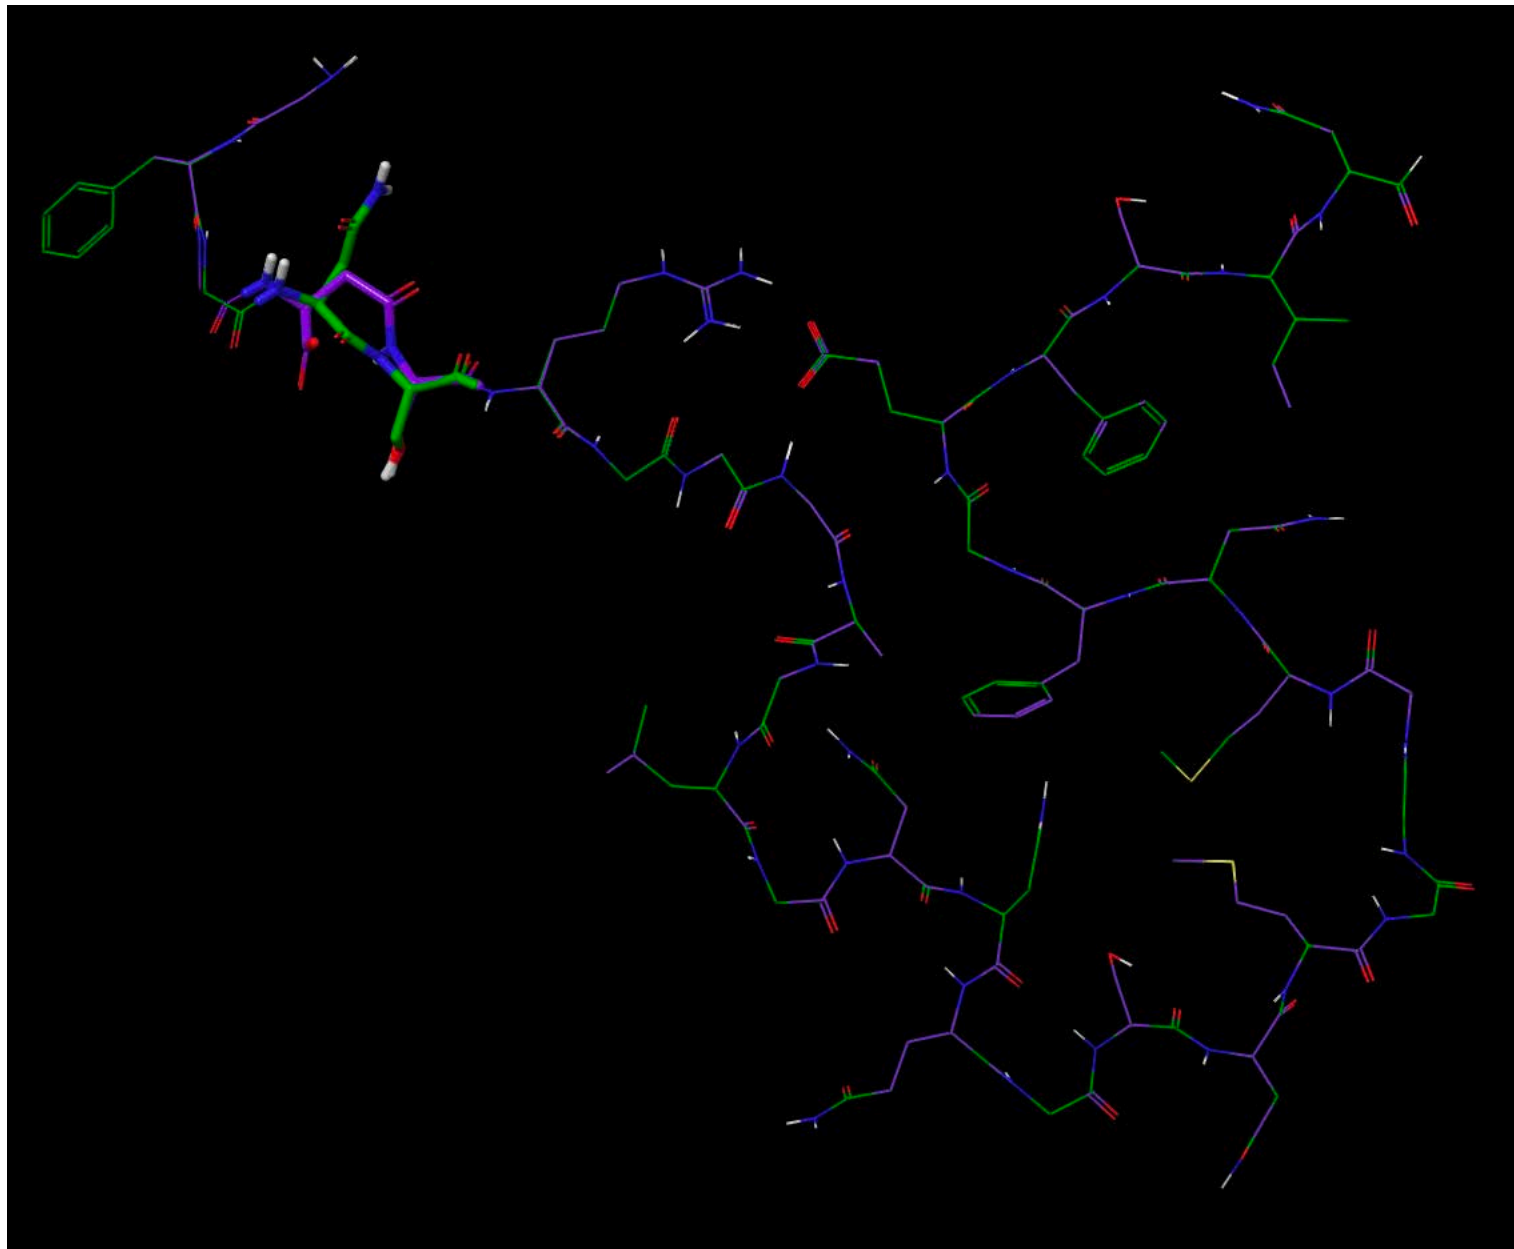

6N3C with isoaspartate 291: -902.6

GFGNSRGGGAGLGNNQGSNMGGGMNFGEFSIN

6N3C: -1064.5

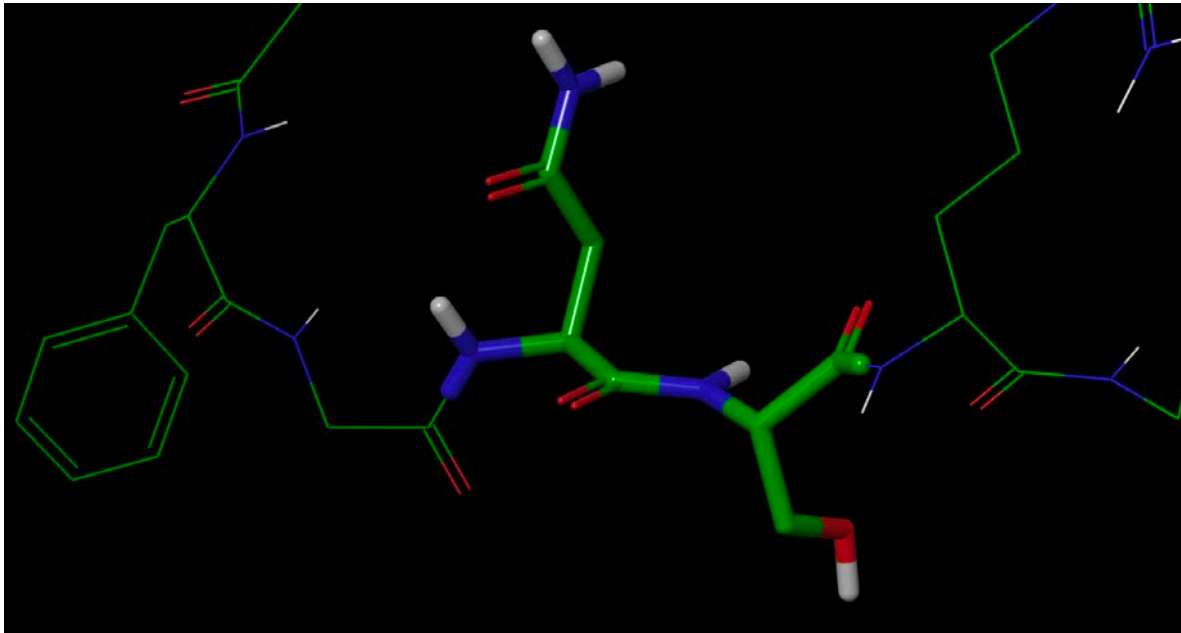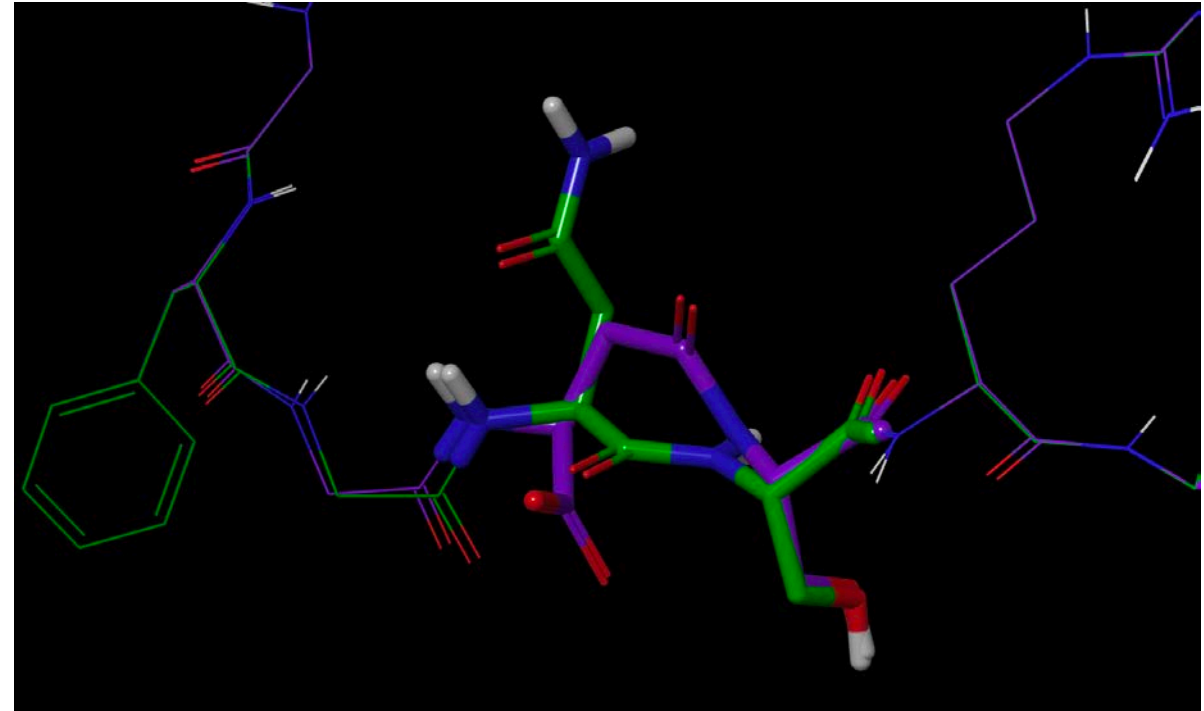

6N3C with isoaspartate 291: -902.6

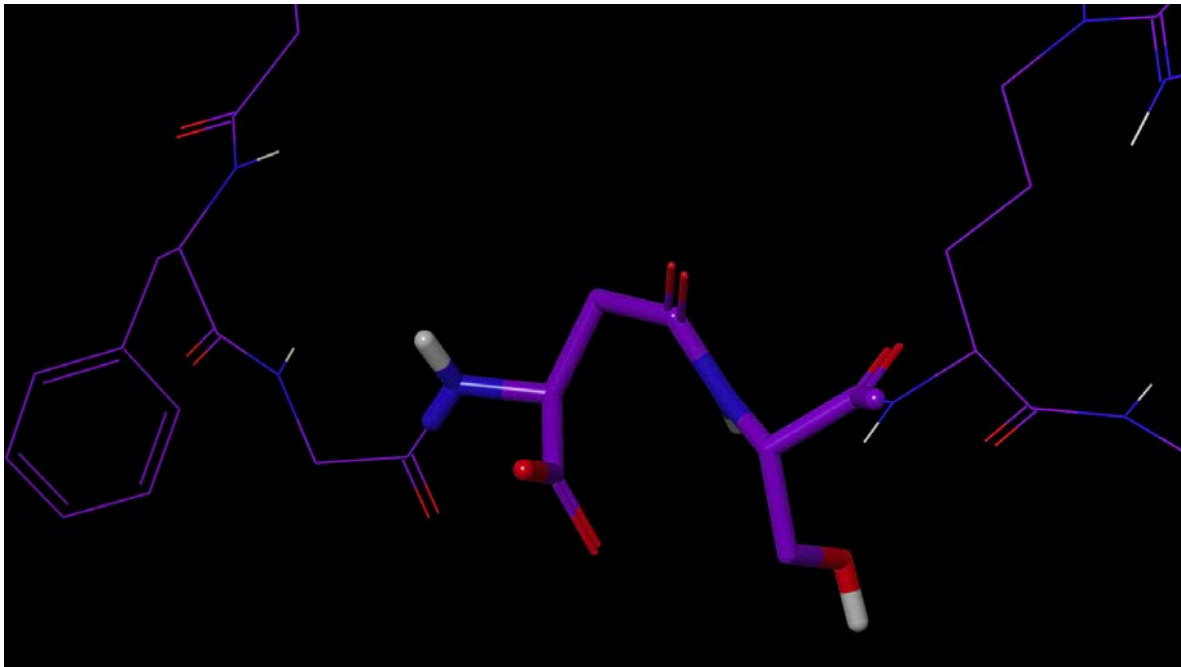

GFGNSRGGGAGLGNNNQGSNMGGGMNFGEFSIN

6N3C: -1064.5

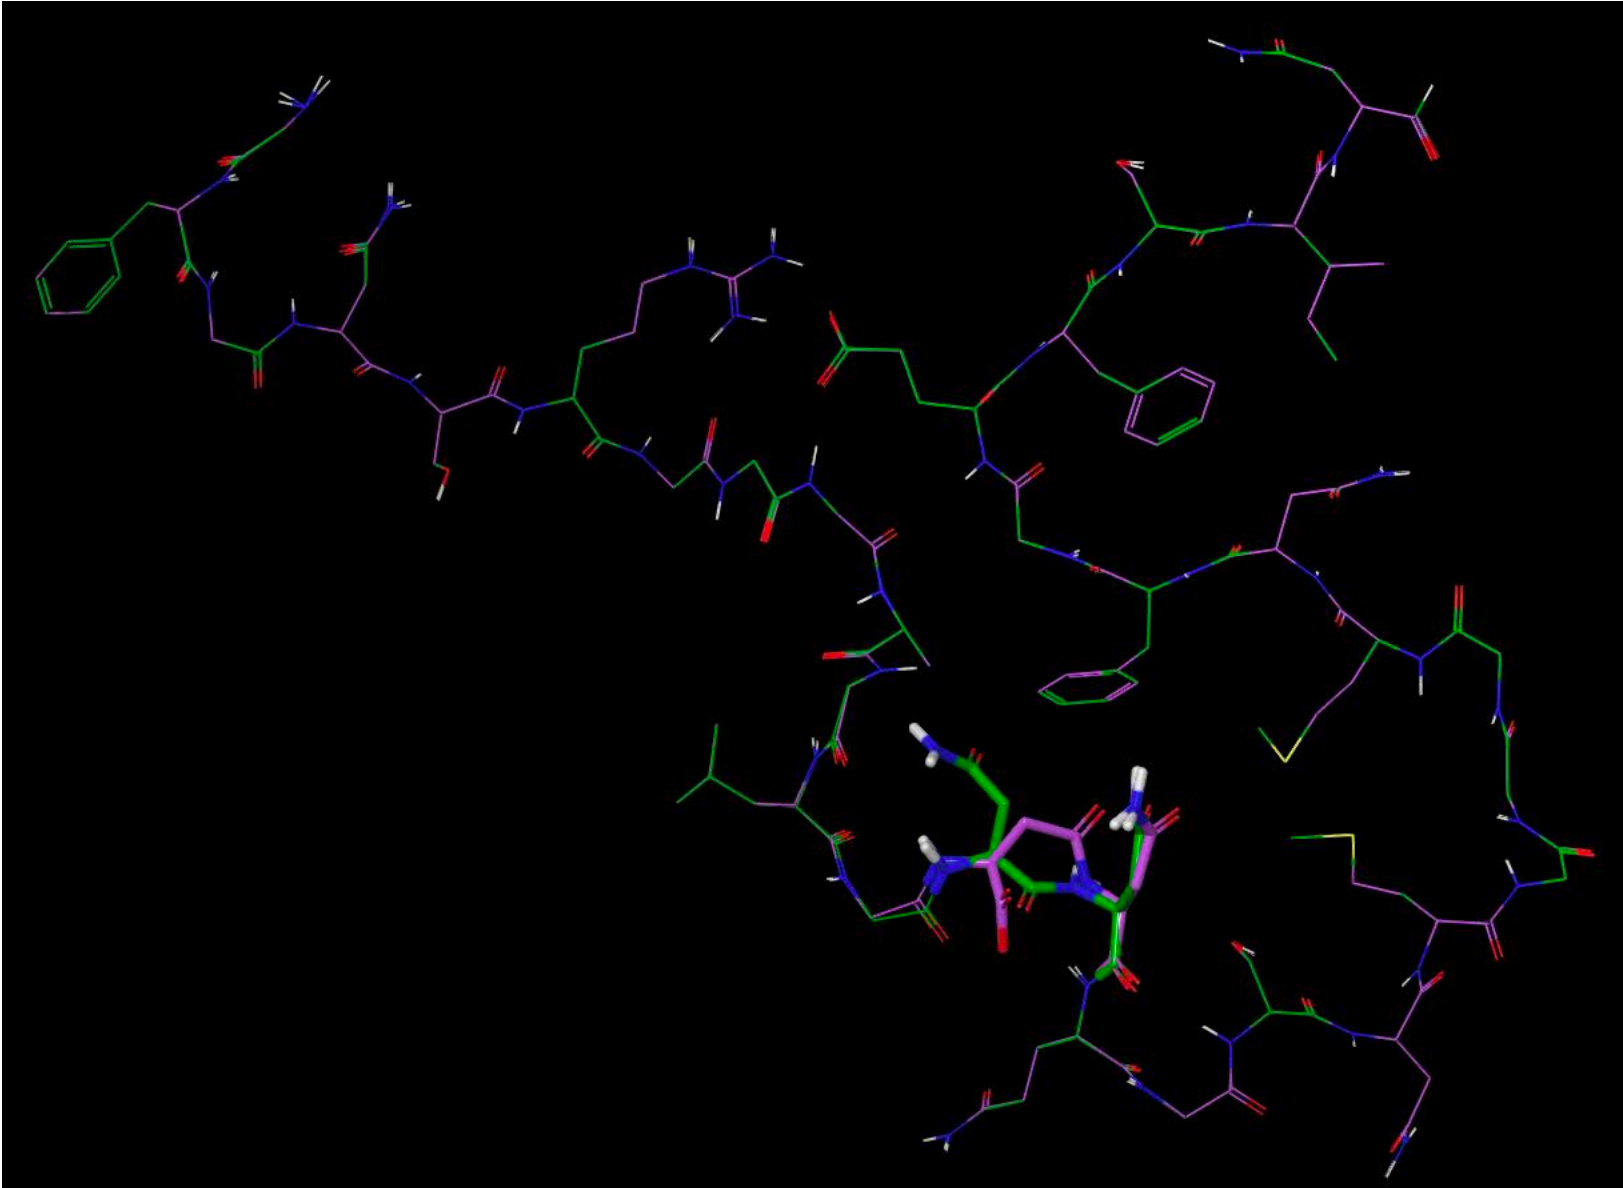

6N3C with isoaspartate 301: -894.2



GFGNSRGGGAGLGNNNQGSNMGGGMNFGEFSIN

6N3C: -1064.5

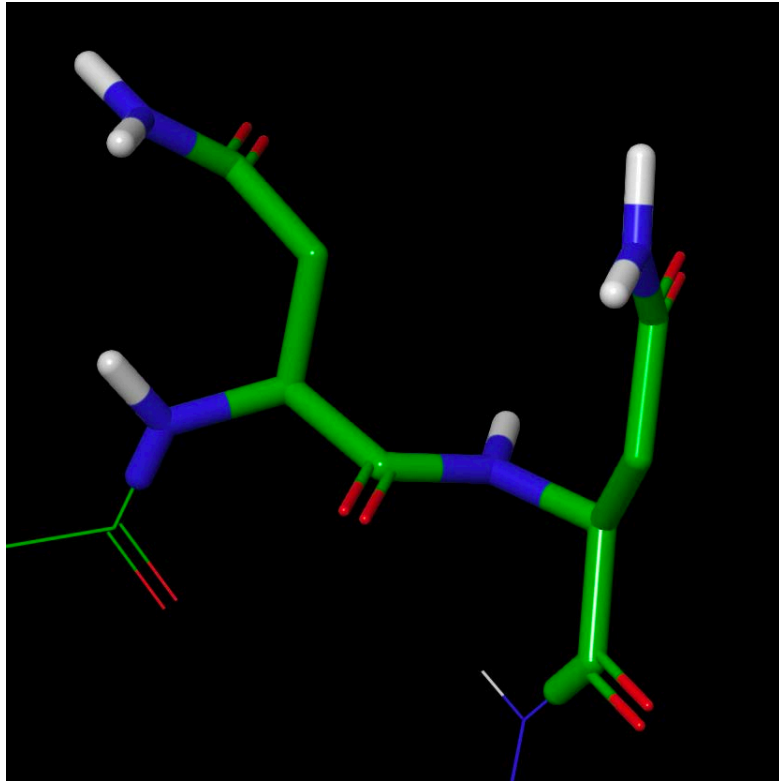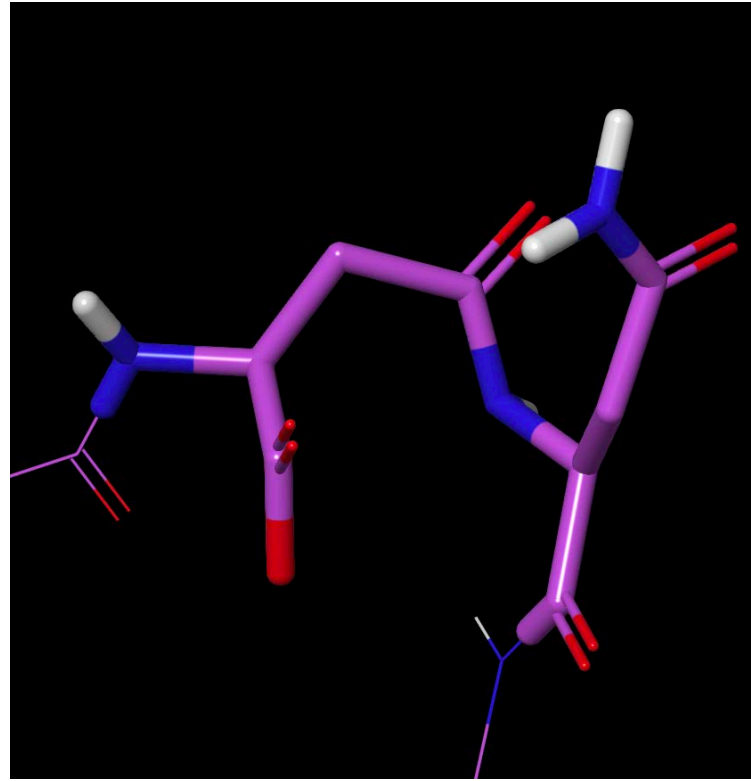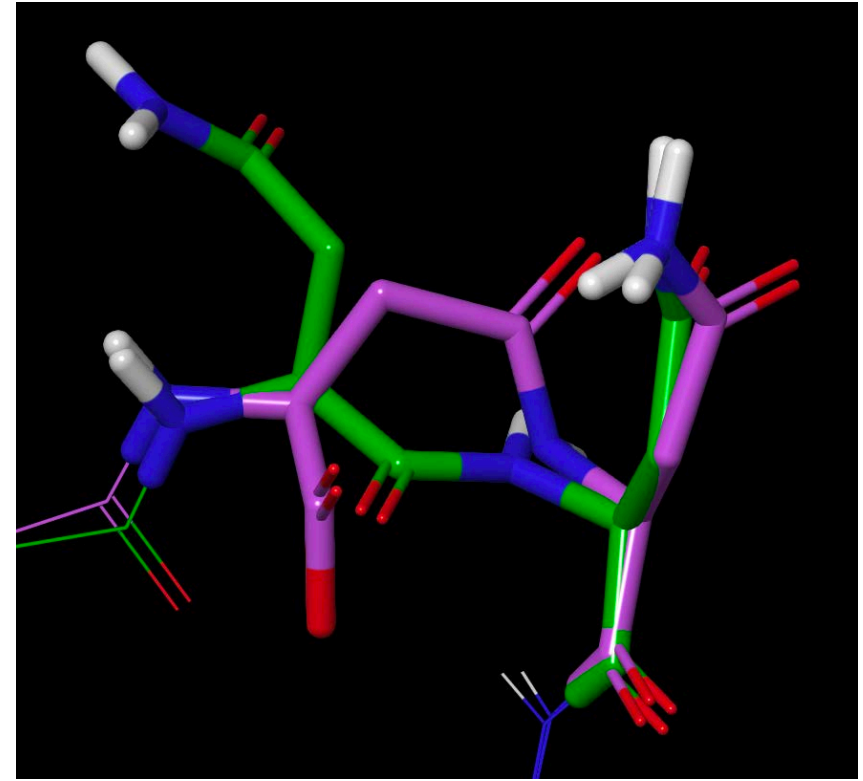

6N3C with isoaspartate 301: -894.2

GFGNSRGGGAGLGNNQGSNMGGGMNFGEFSIN

6N3C: -1064.5

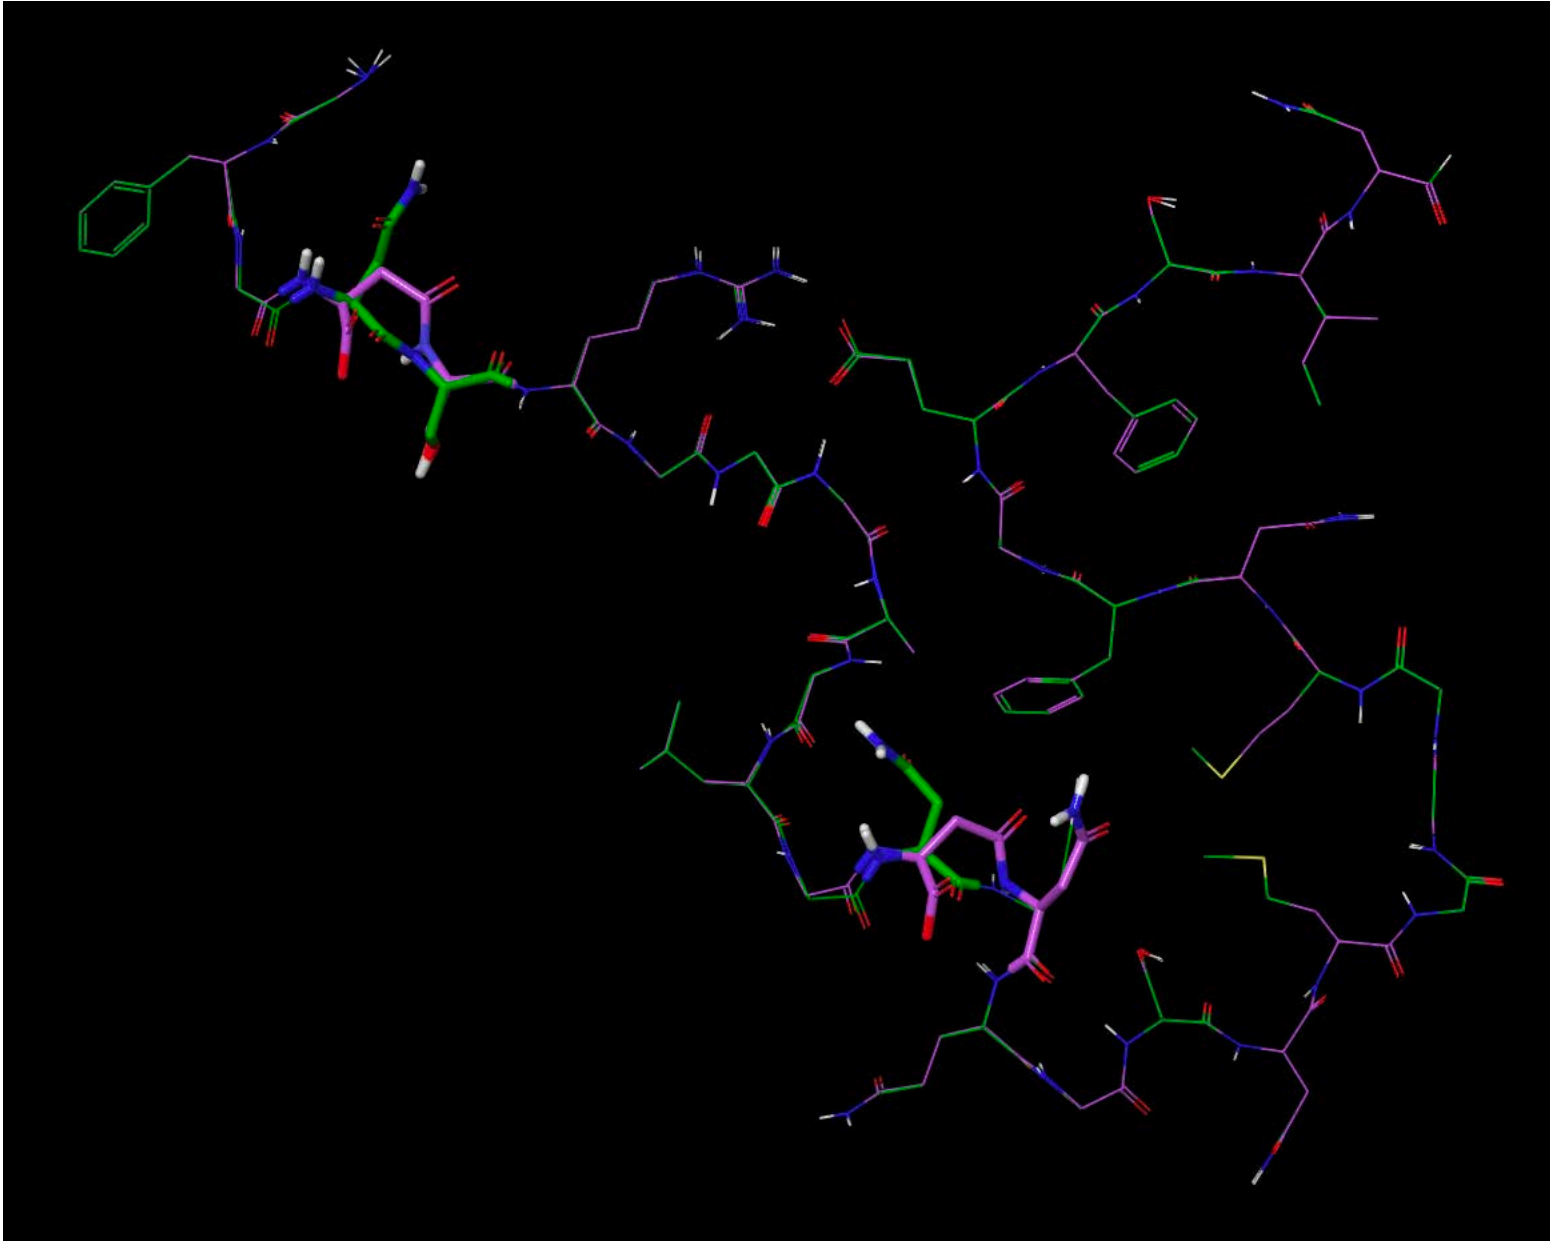

6N3C with isoaspartates  
291 and 301: -759.7

6N3A: -1778.6; all site highlighted

MNFGAFSINPAMMAAAQAALQSSWGMMGMLASQQNQSGPSGNNQNQGNMQ

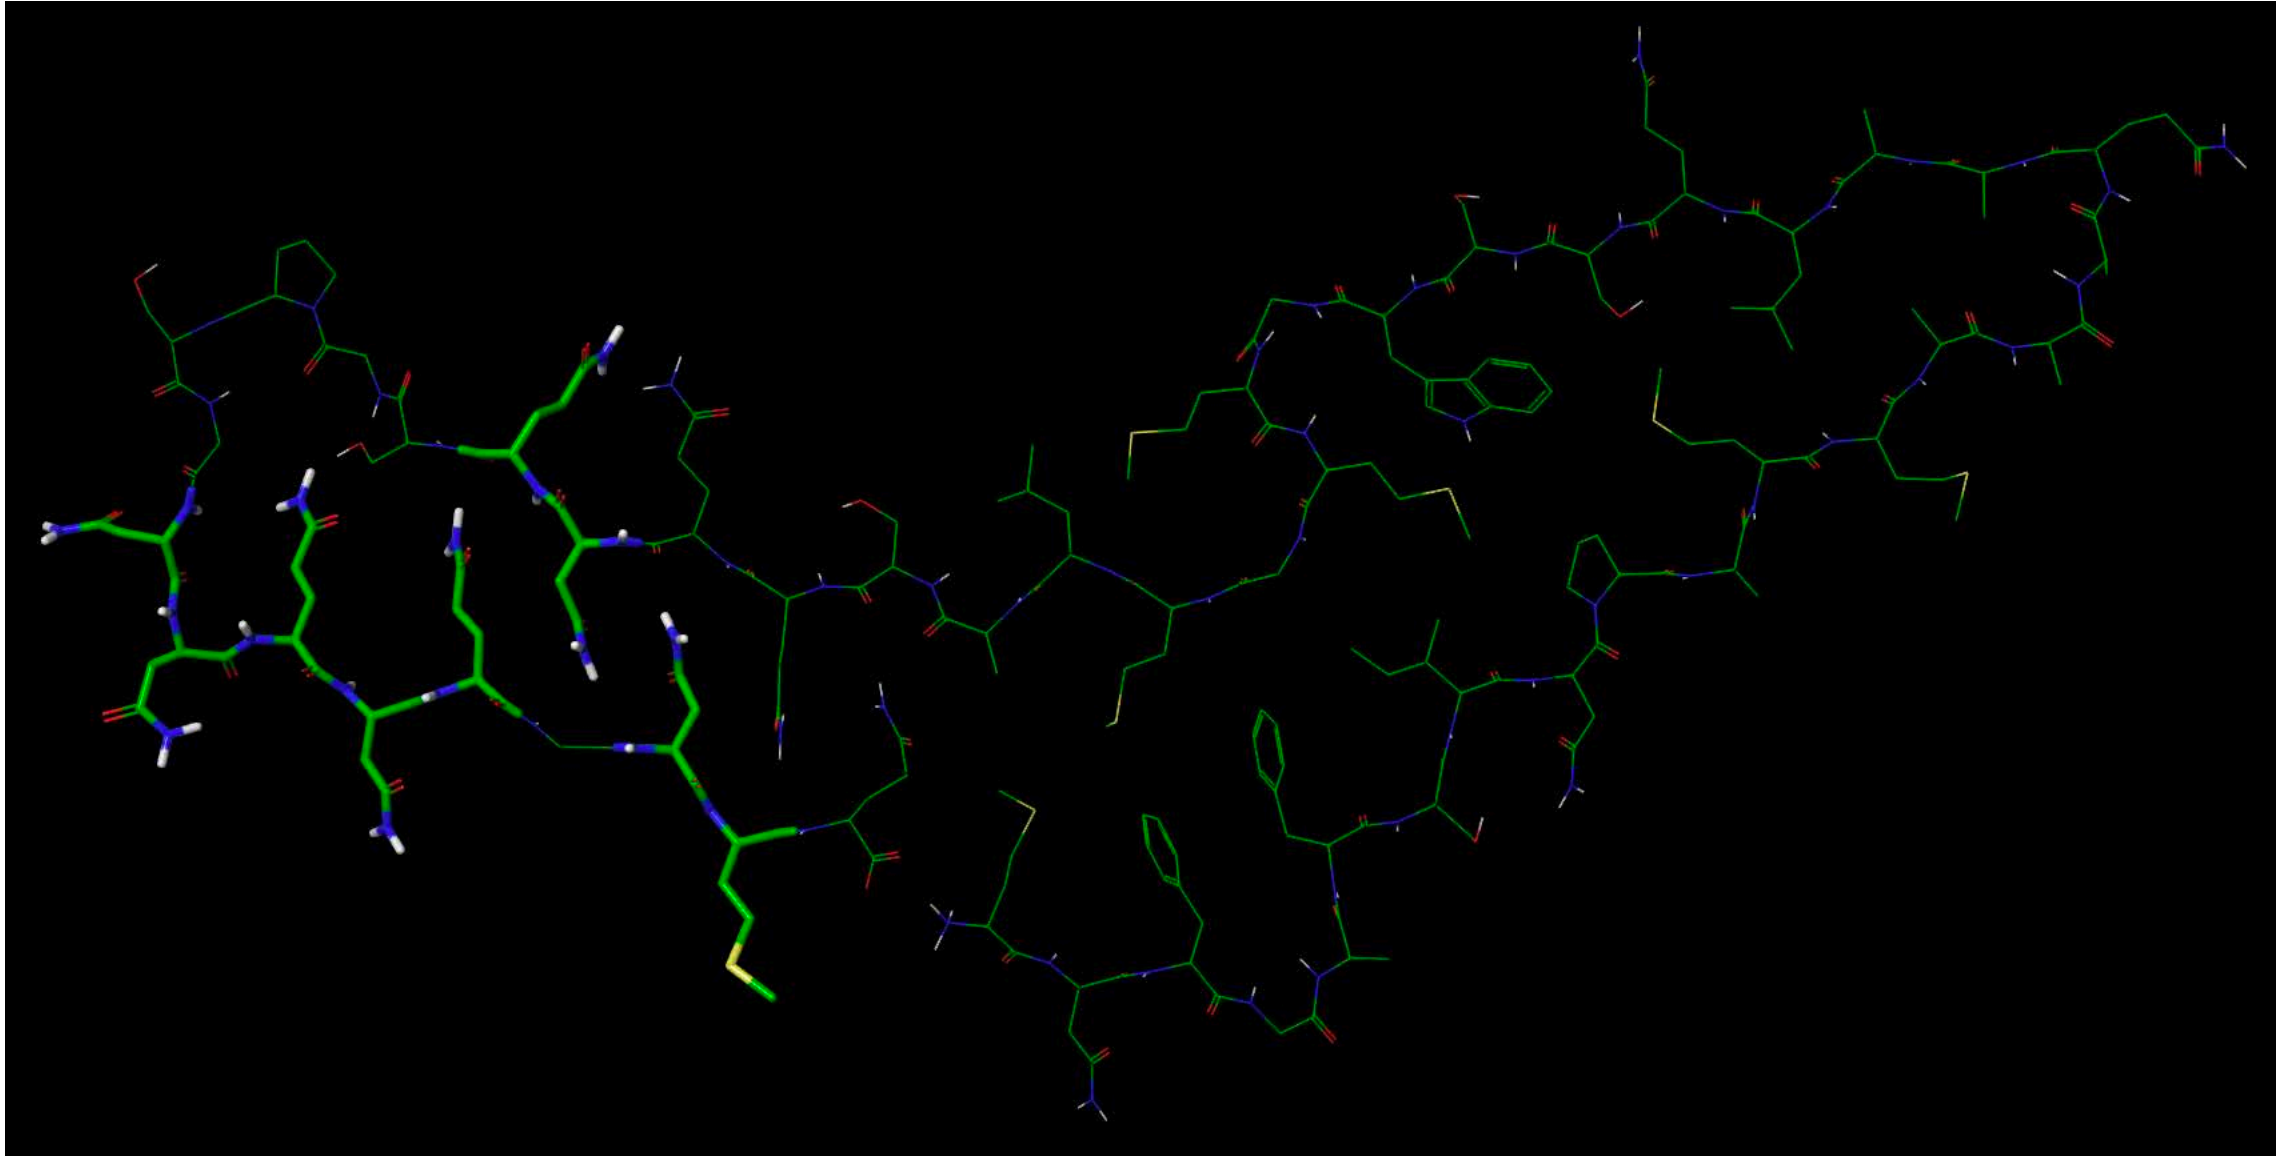

6N3A: -1778.6

MNFGAFSINPAMMAAAQAALQSSWGMMGMLASQQNQSGPSGNNQNQGNMQ

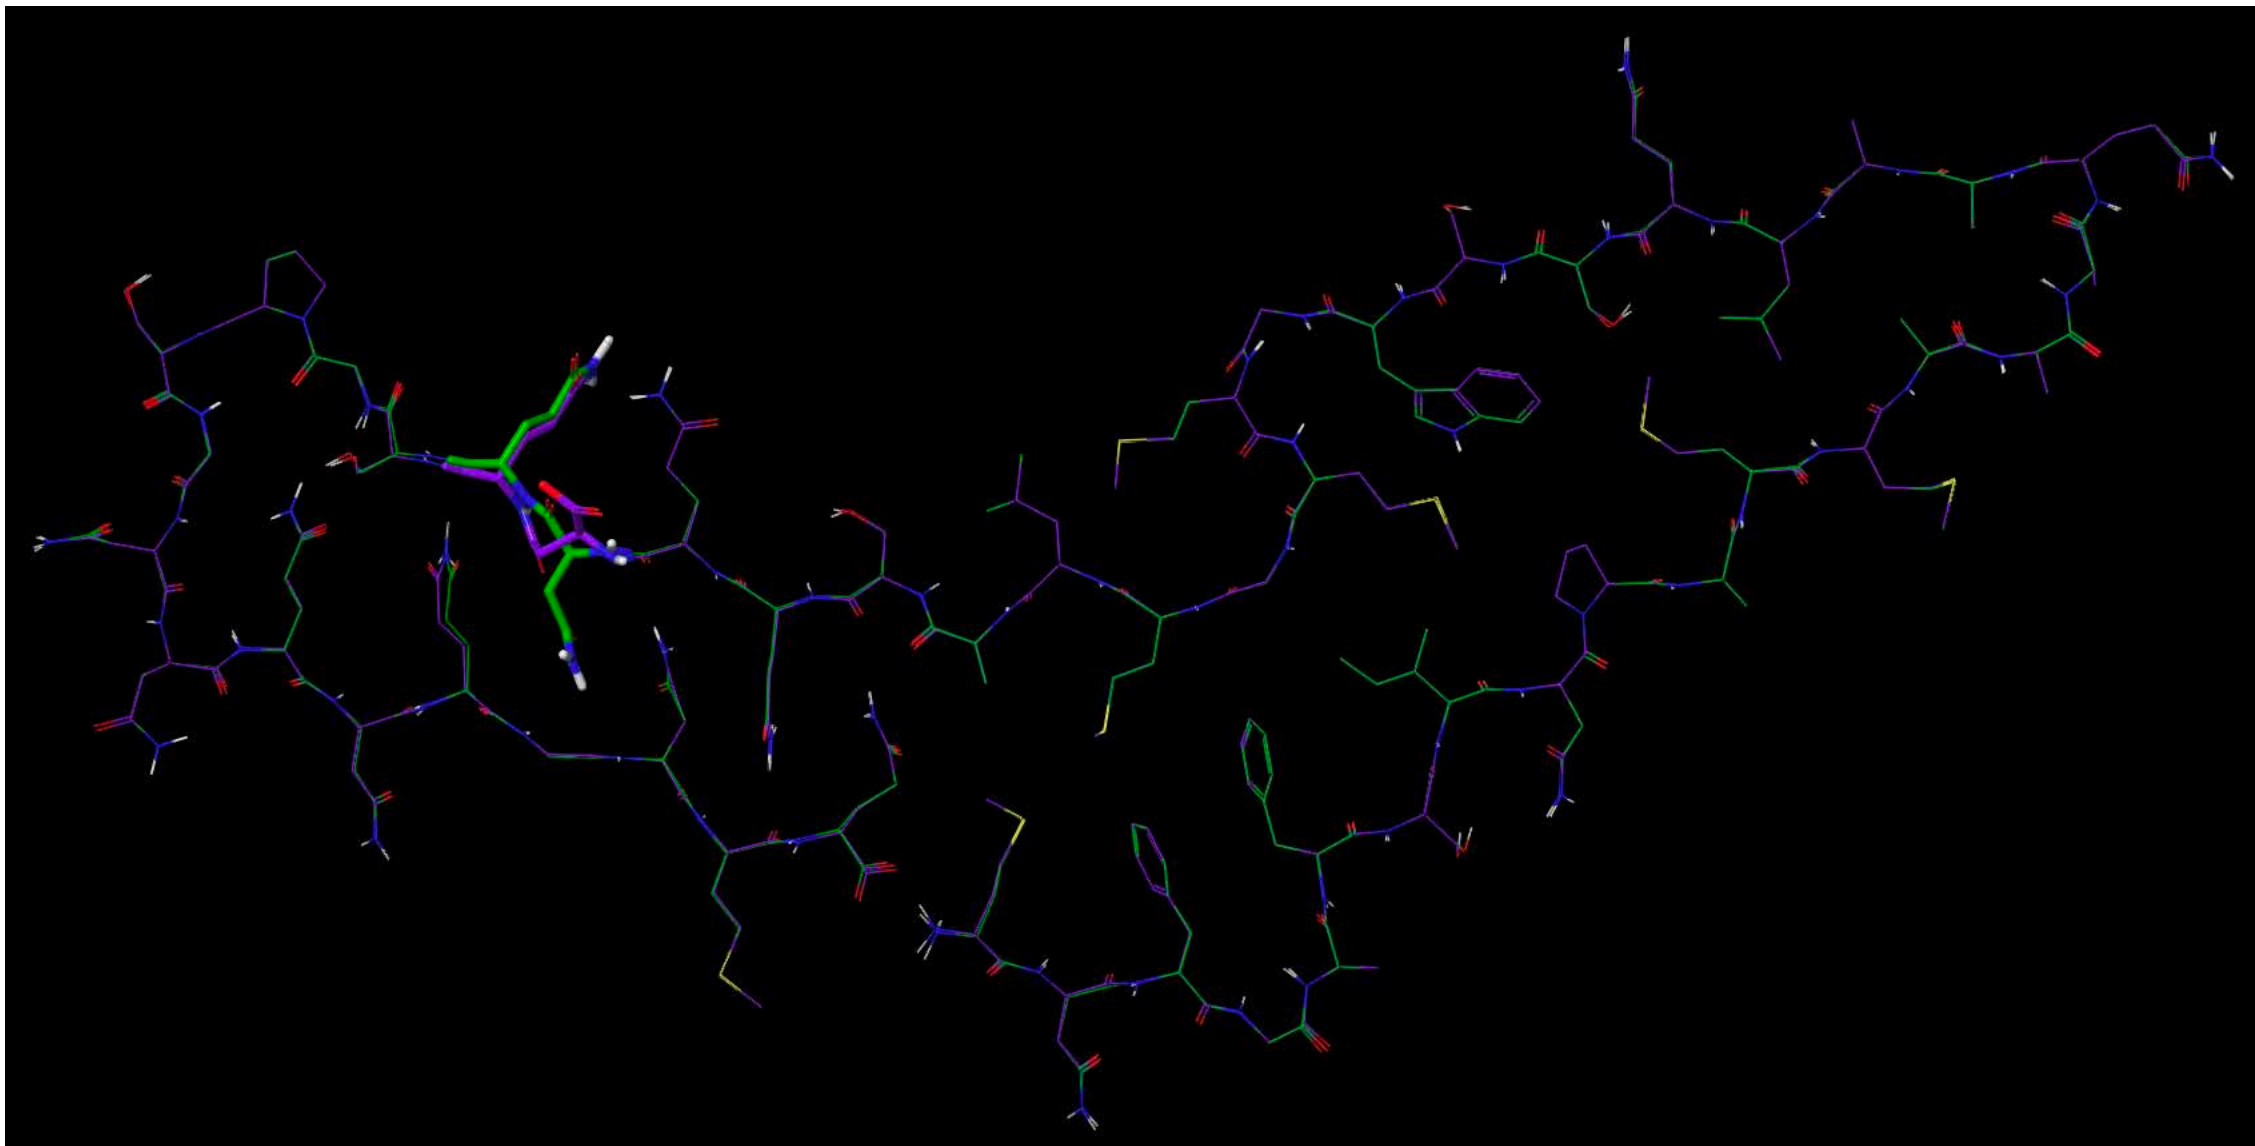

6N3A with isoaspartate 345 (N): -1710.7

6N3A

MNFGAFSINPAMMAAAQAALQSSWGMMGMLASQQNQSGPSGNNQNQGNMQ

6N3A: -1778.6

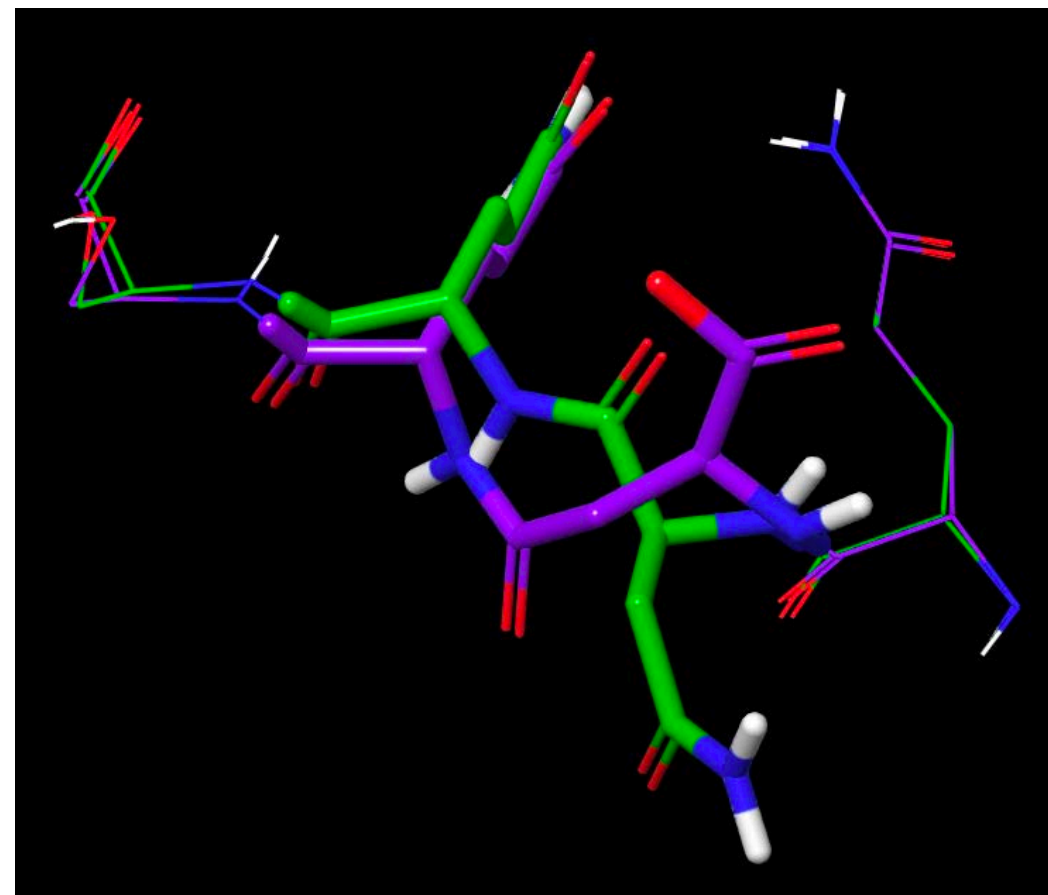

6N3A with isoaspartate 345 (N): -1710.7

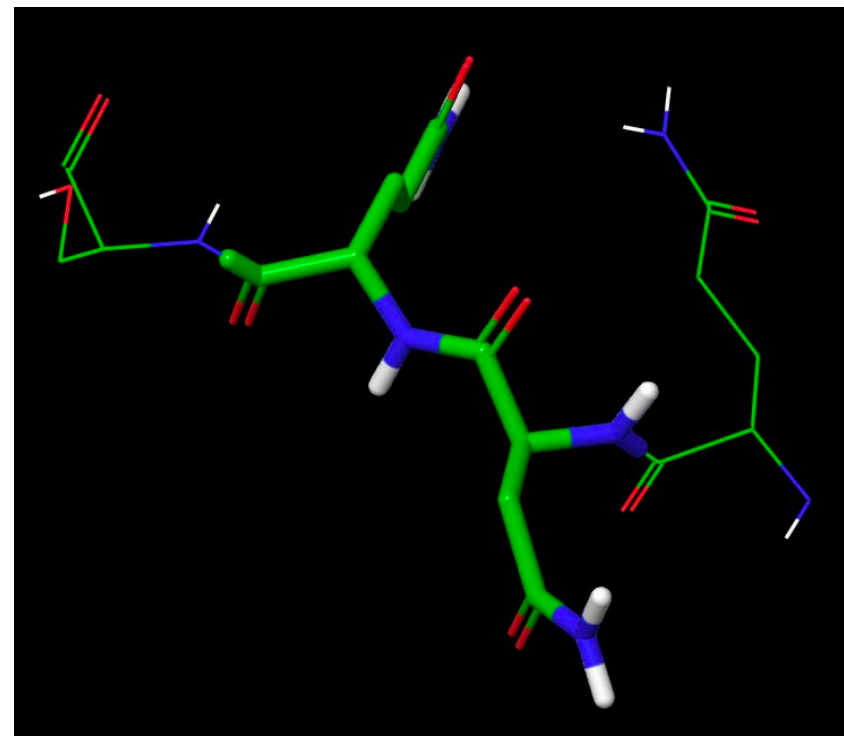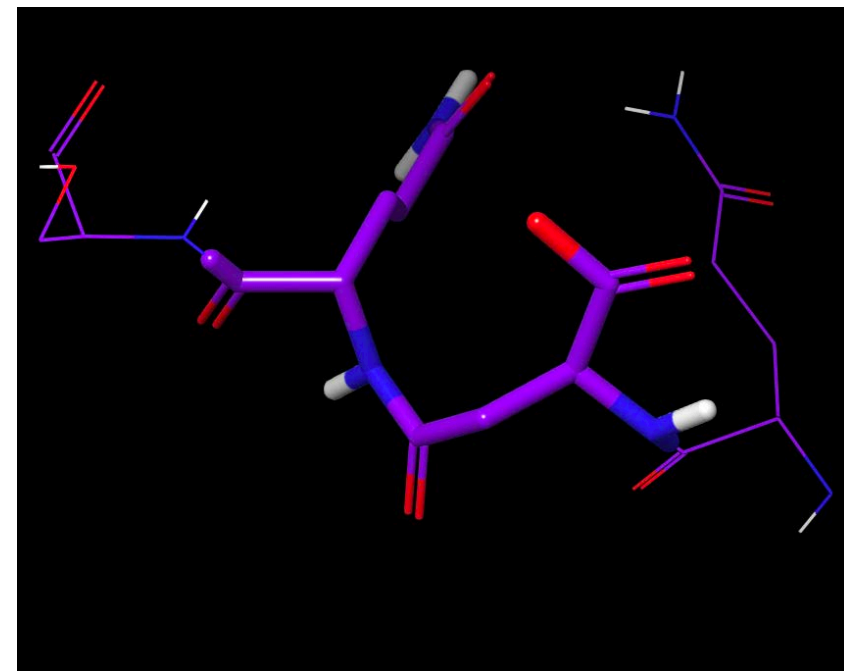

6N3A: -1778.6

MNFGAFSINPAMMAAAQAALQSSWGMMLASQQNQSGPSGNNQNGNQ

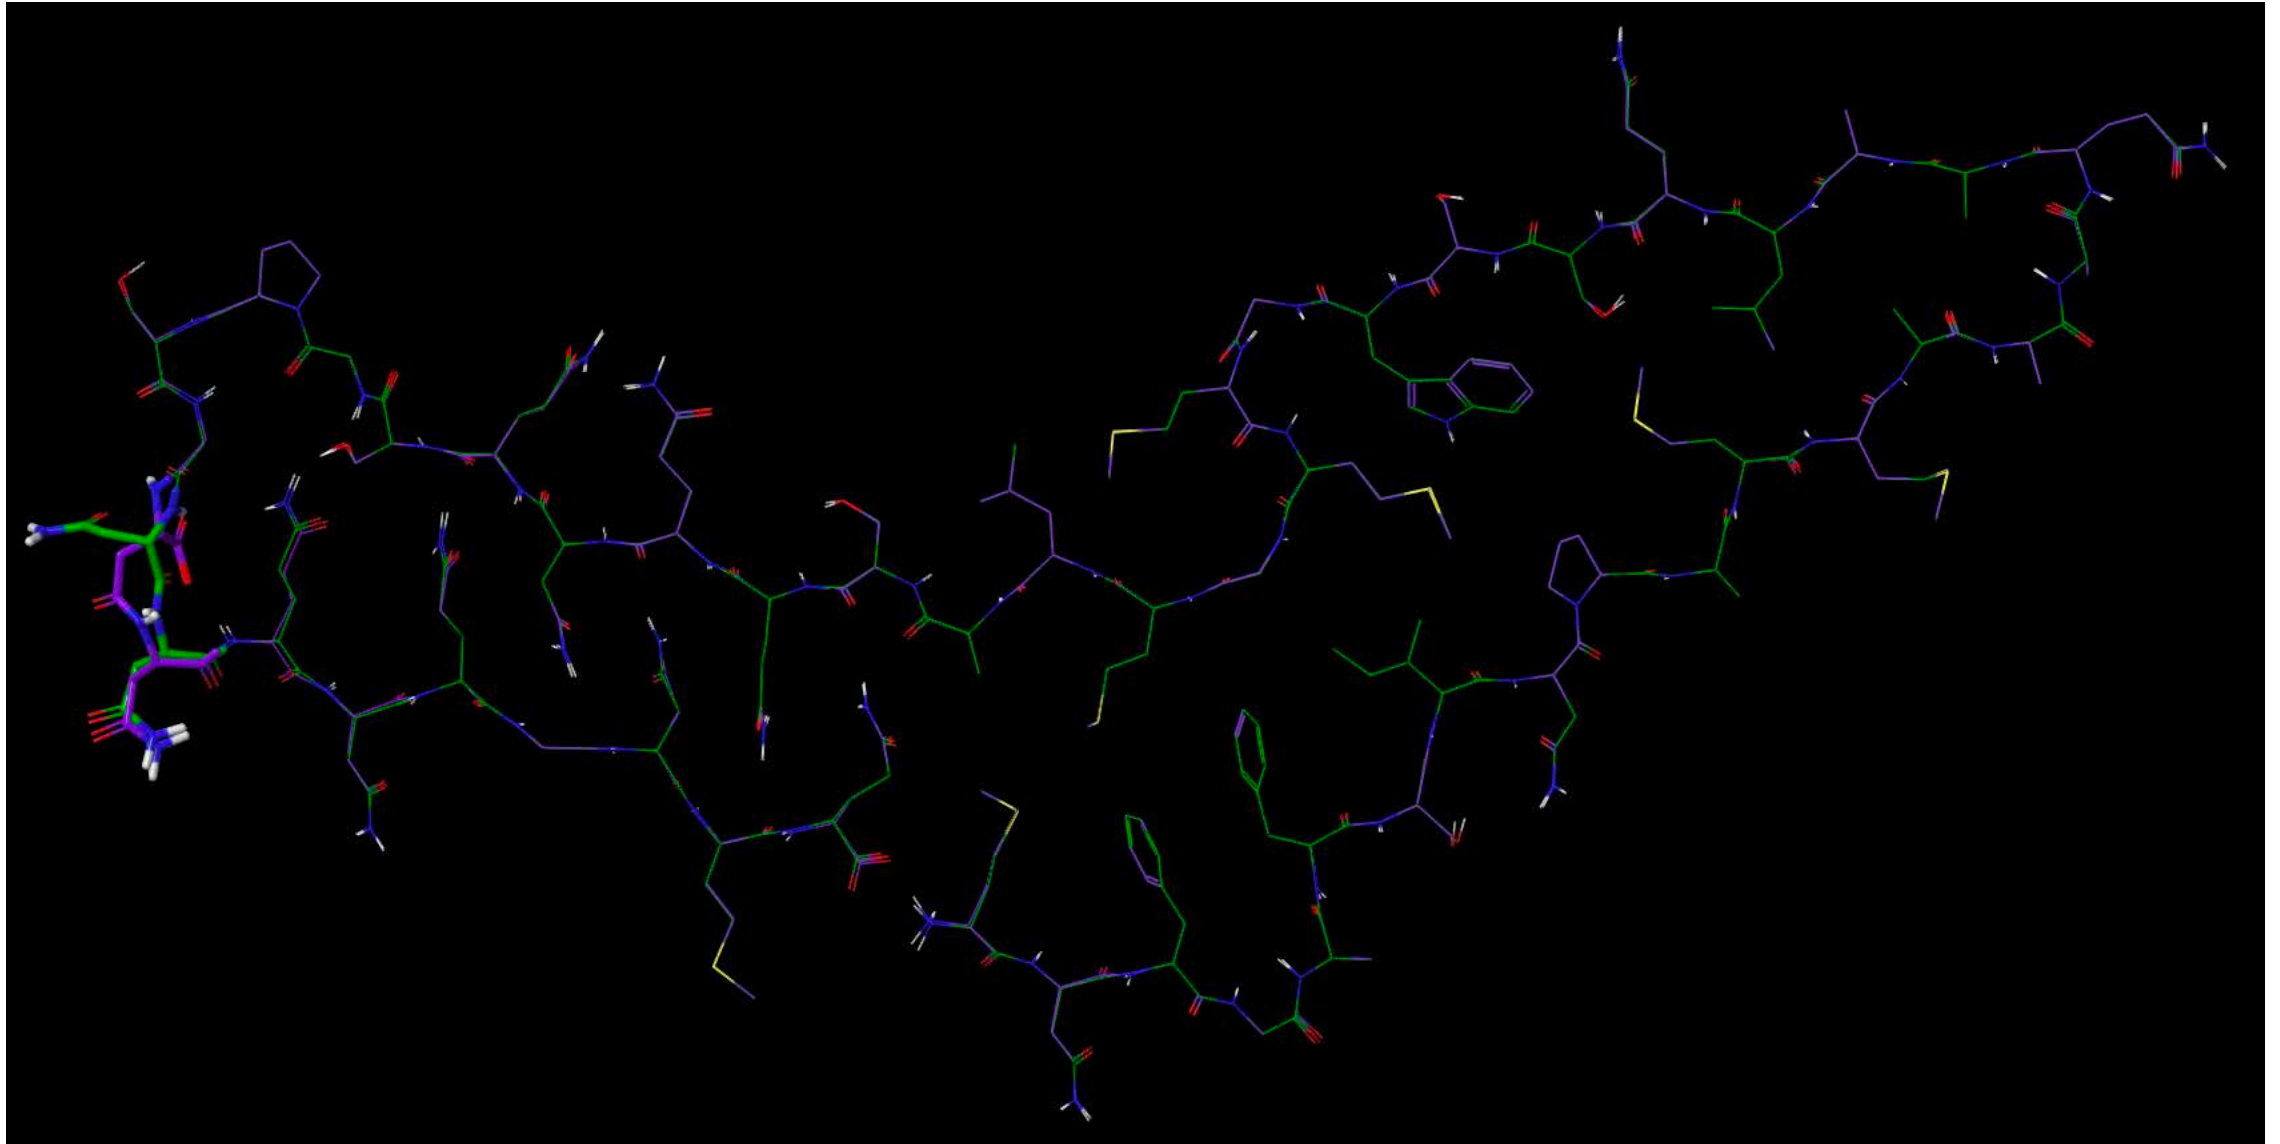

6N3A with isoaspartate 352: -1703.7

6N3A

MNFGAFSINPAMMAAAQAALQSSWGMMGMLASQQNQSGPSGNNQNQGNMQ

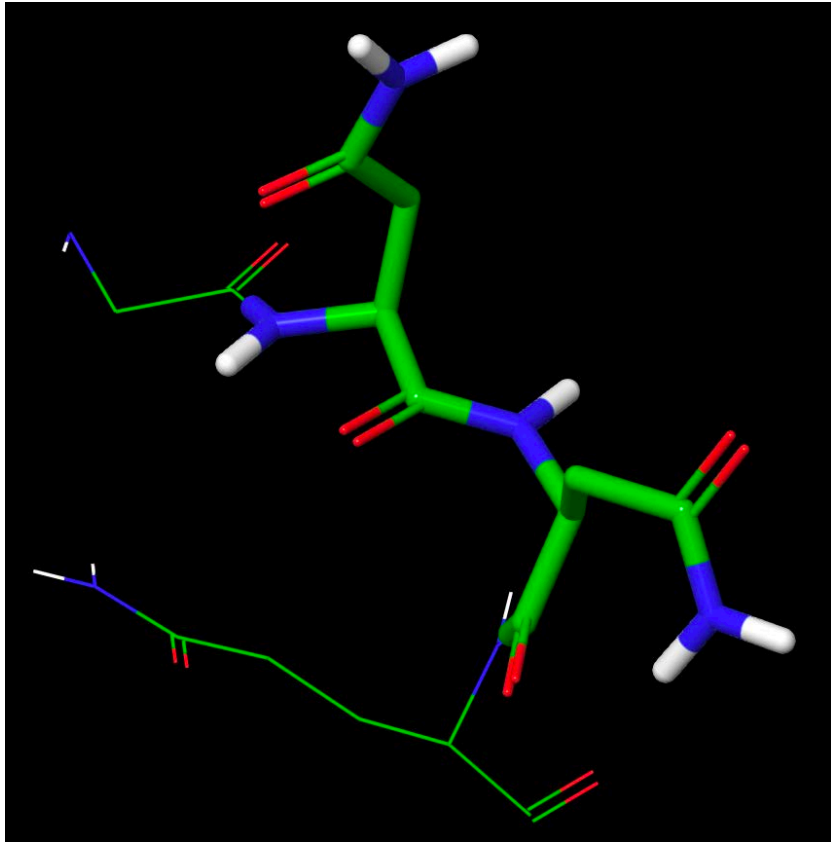

6N3A: -1778.6

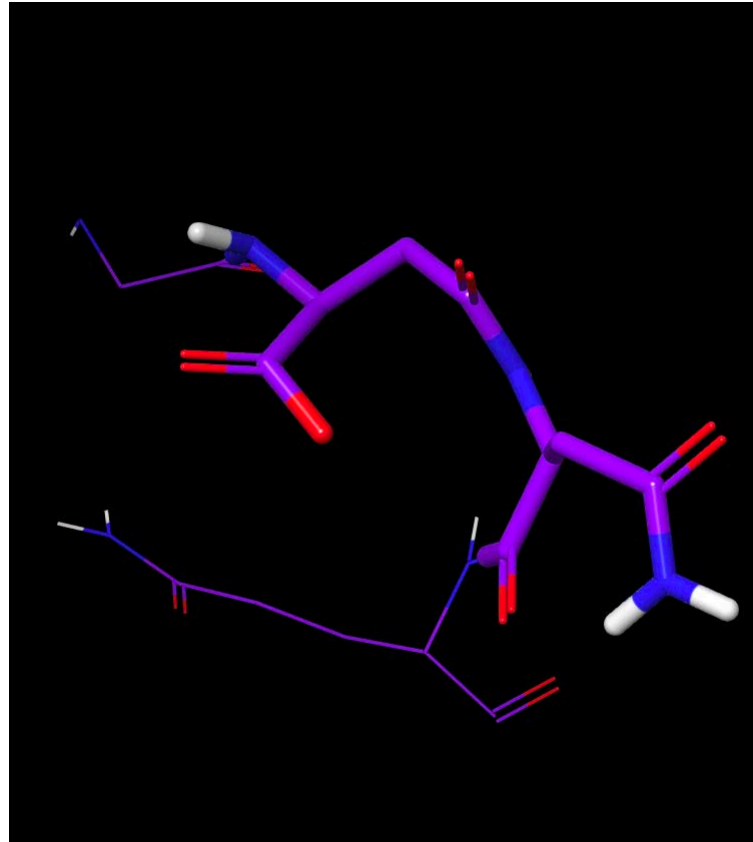

6N3A with isoaspartate 352 (N): -1703.7

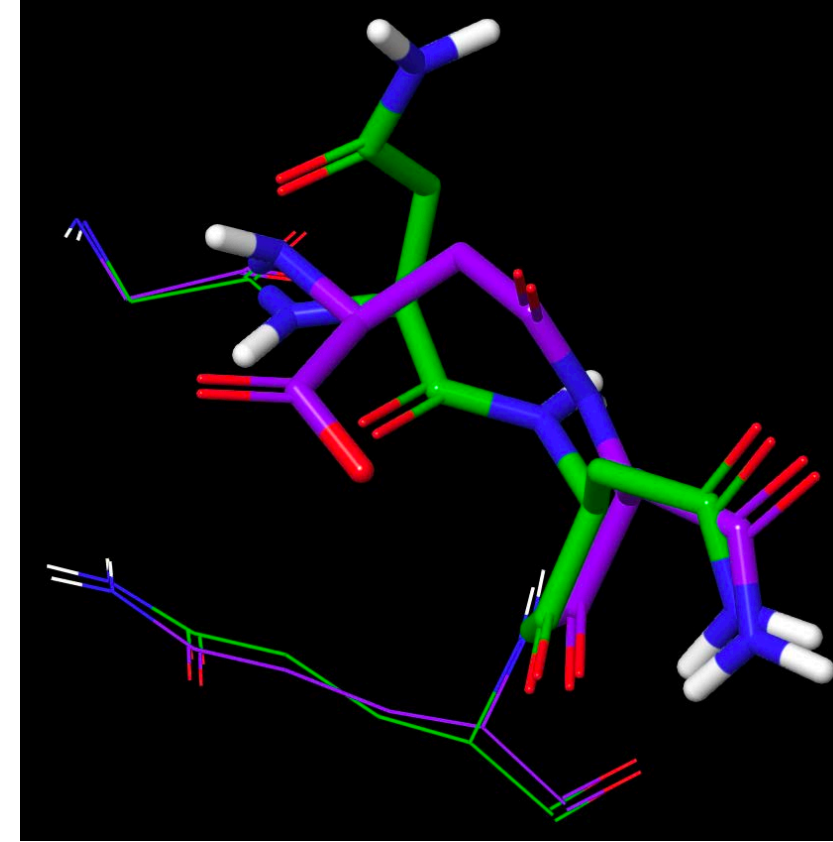

6N3A: -1778.6

MNFGAFSINPAMMAAAQAALQSSWGMMGLASQQNQSGPSGNQ~~NQ~~NQGNMQ

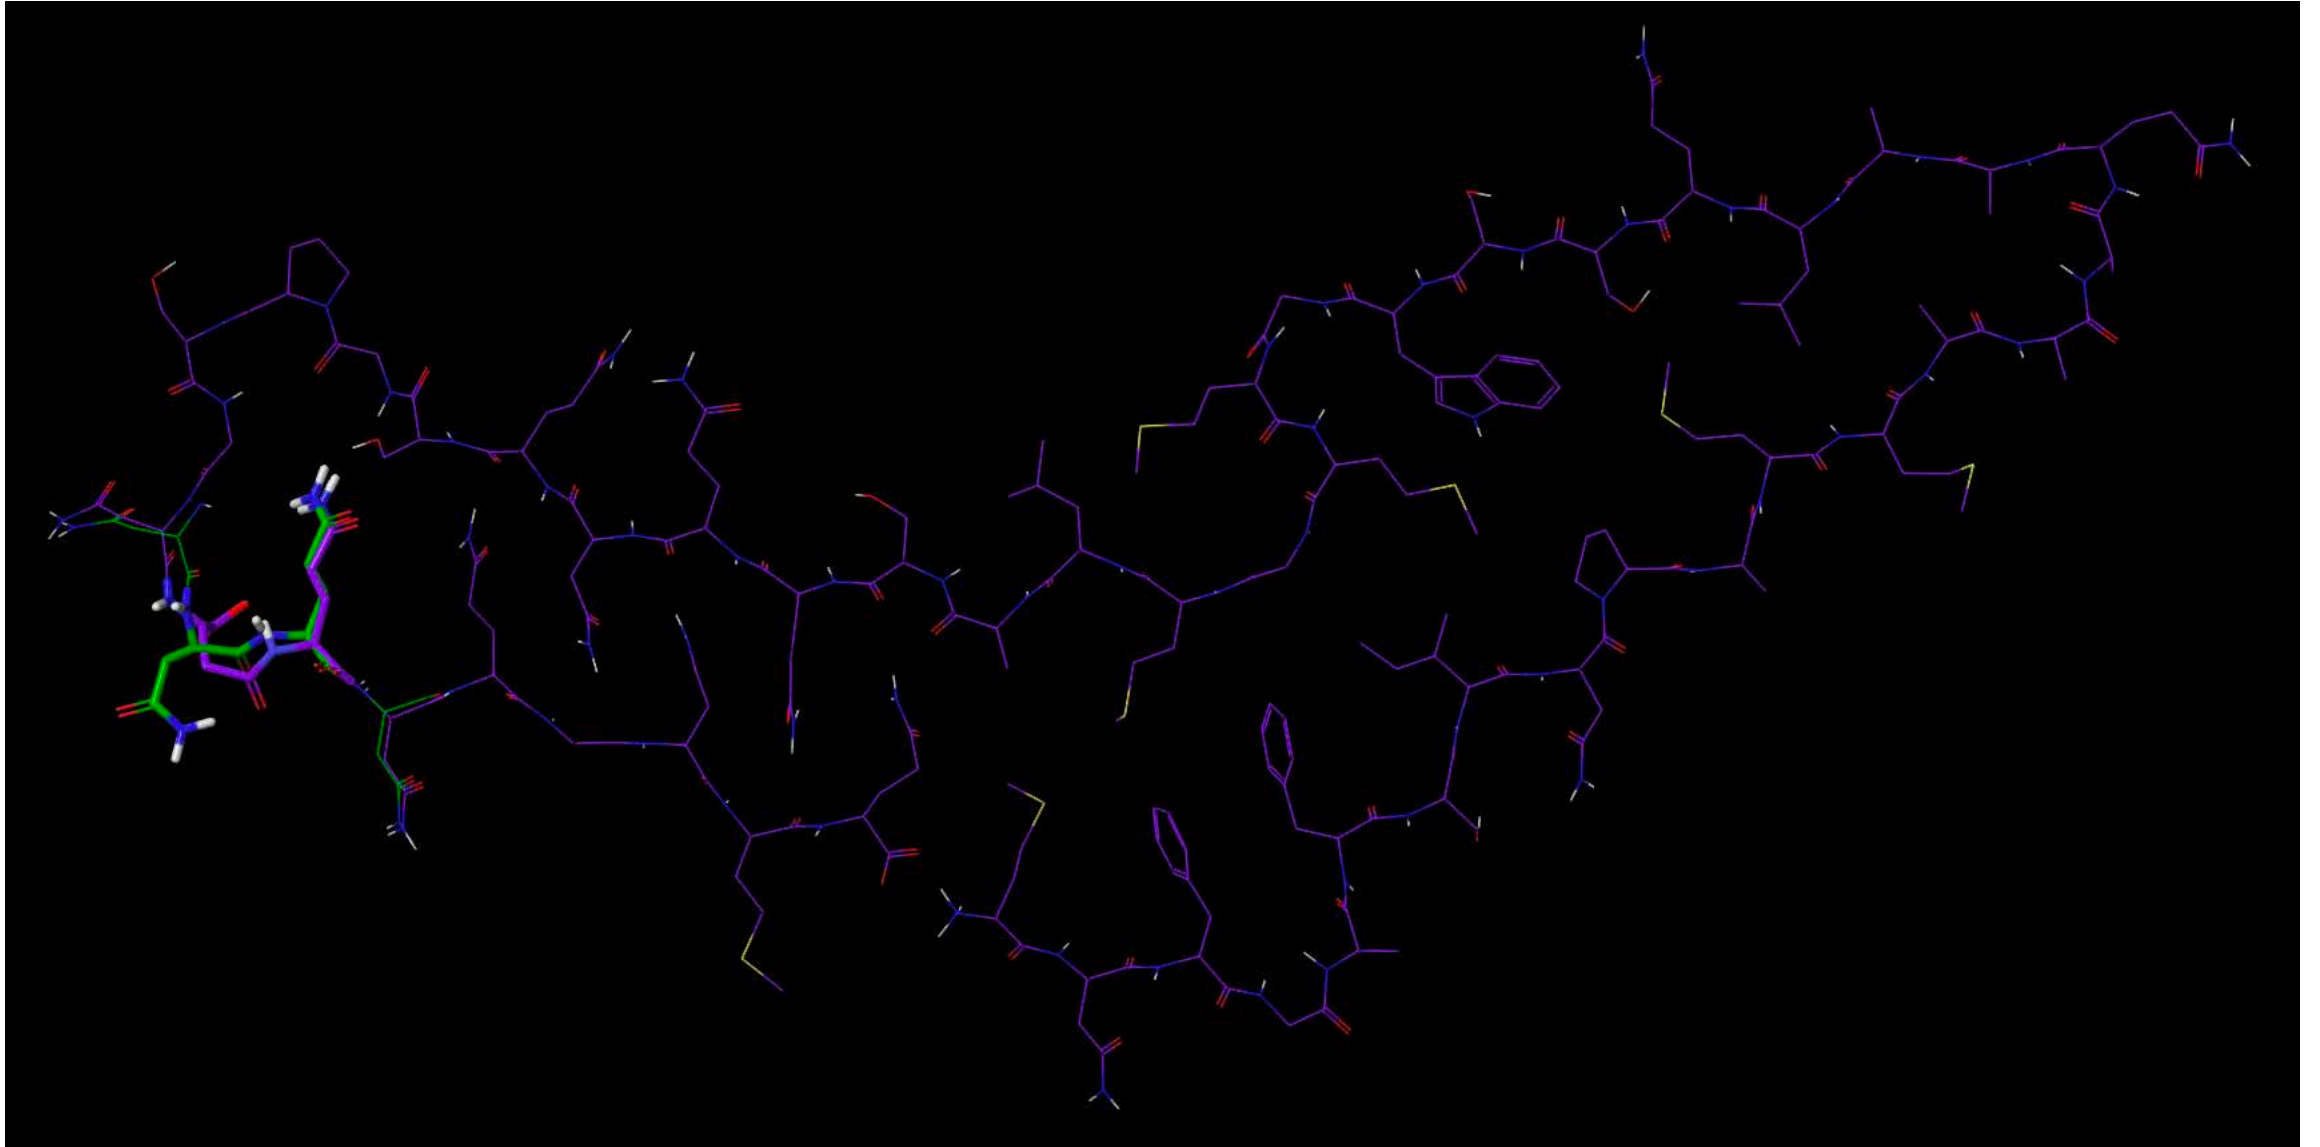

6N3A with isoaspartate 353 (N): -1697.1



MNFGAFSINPAMMAAAQAALQSSWGMMGLASQQNQSGPSGNQ~~NQ~~NQGNMQ

6N3A: -1778.6

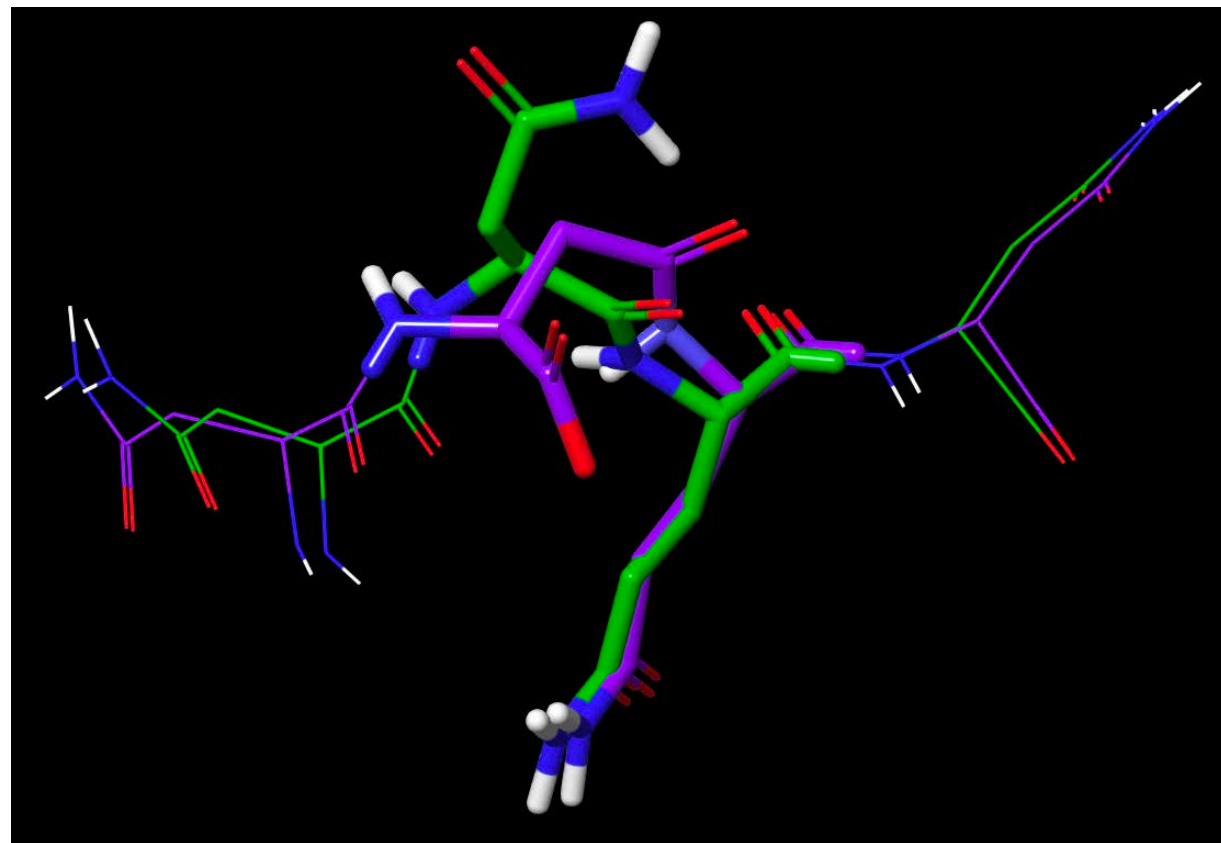

6N3A with isoaspartate 353 (N): -1697.1

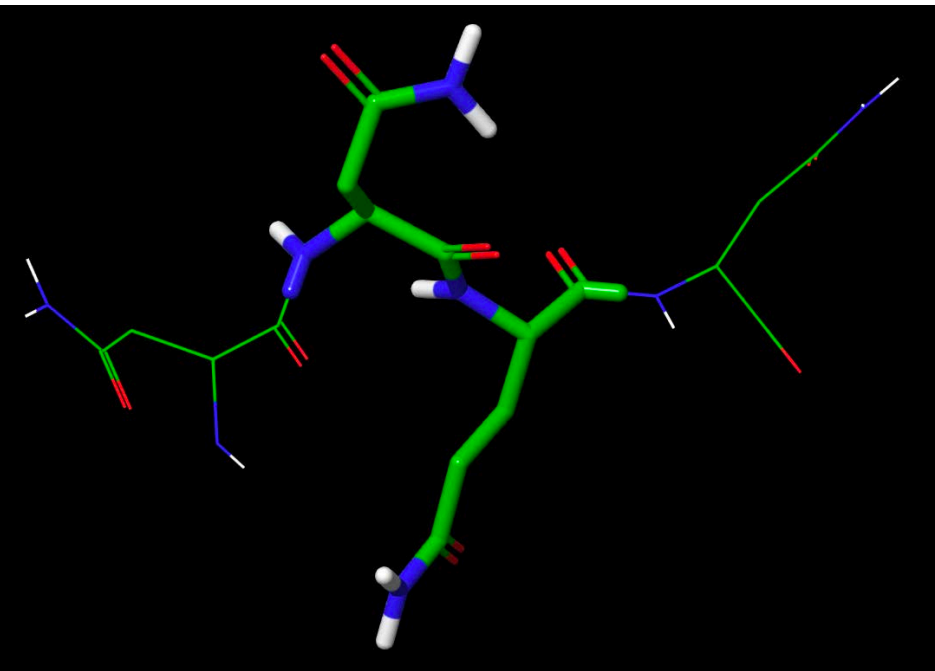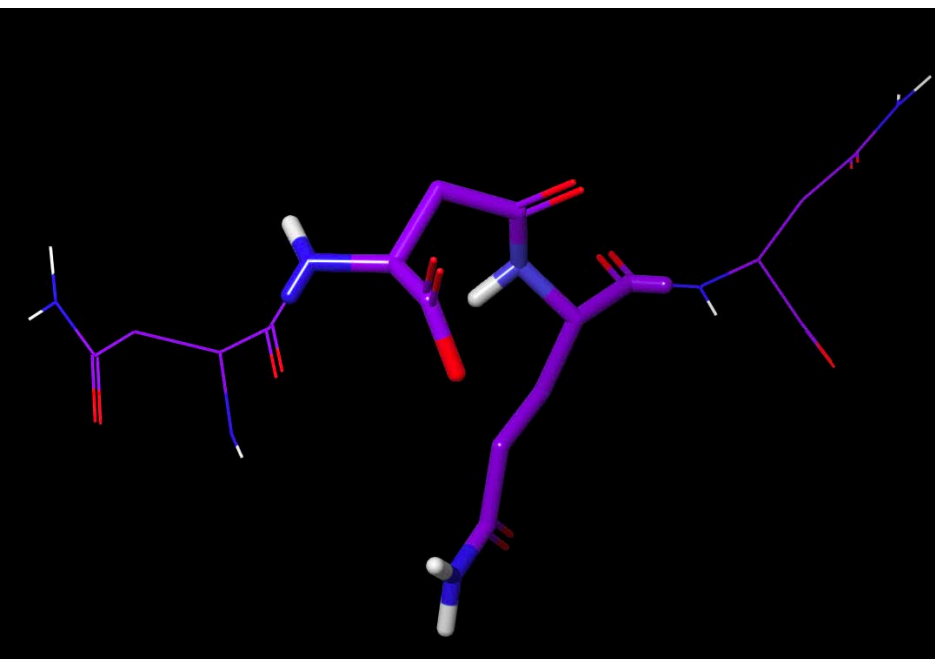

6N3A: -1778.6

MNFGAFSINPAMMAAAQAALQSSWGMMGMLASQQNQSGPSGNNQNQGNMQ

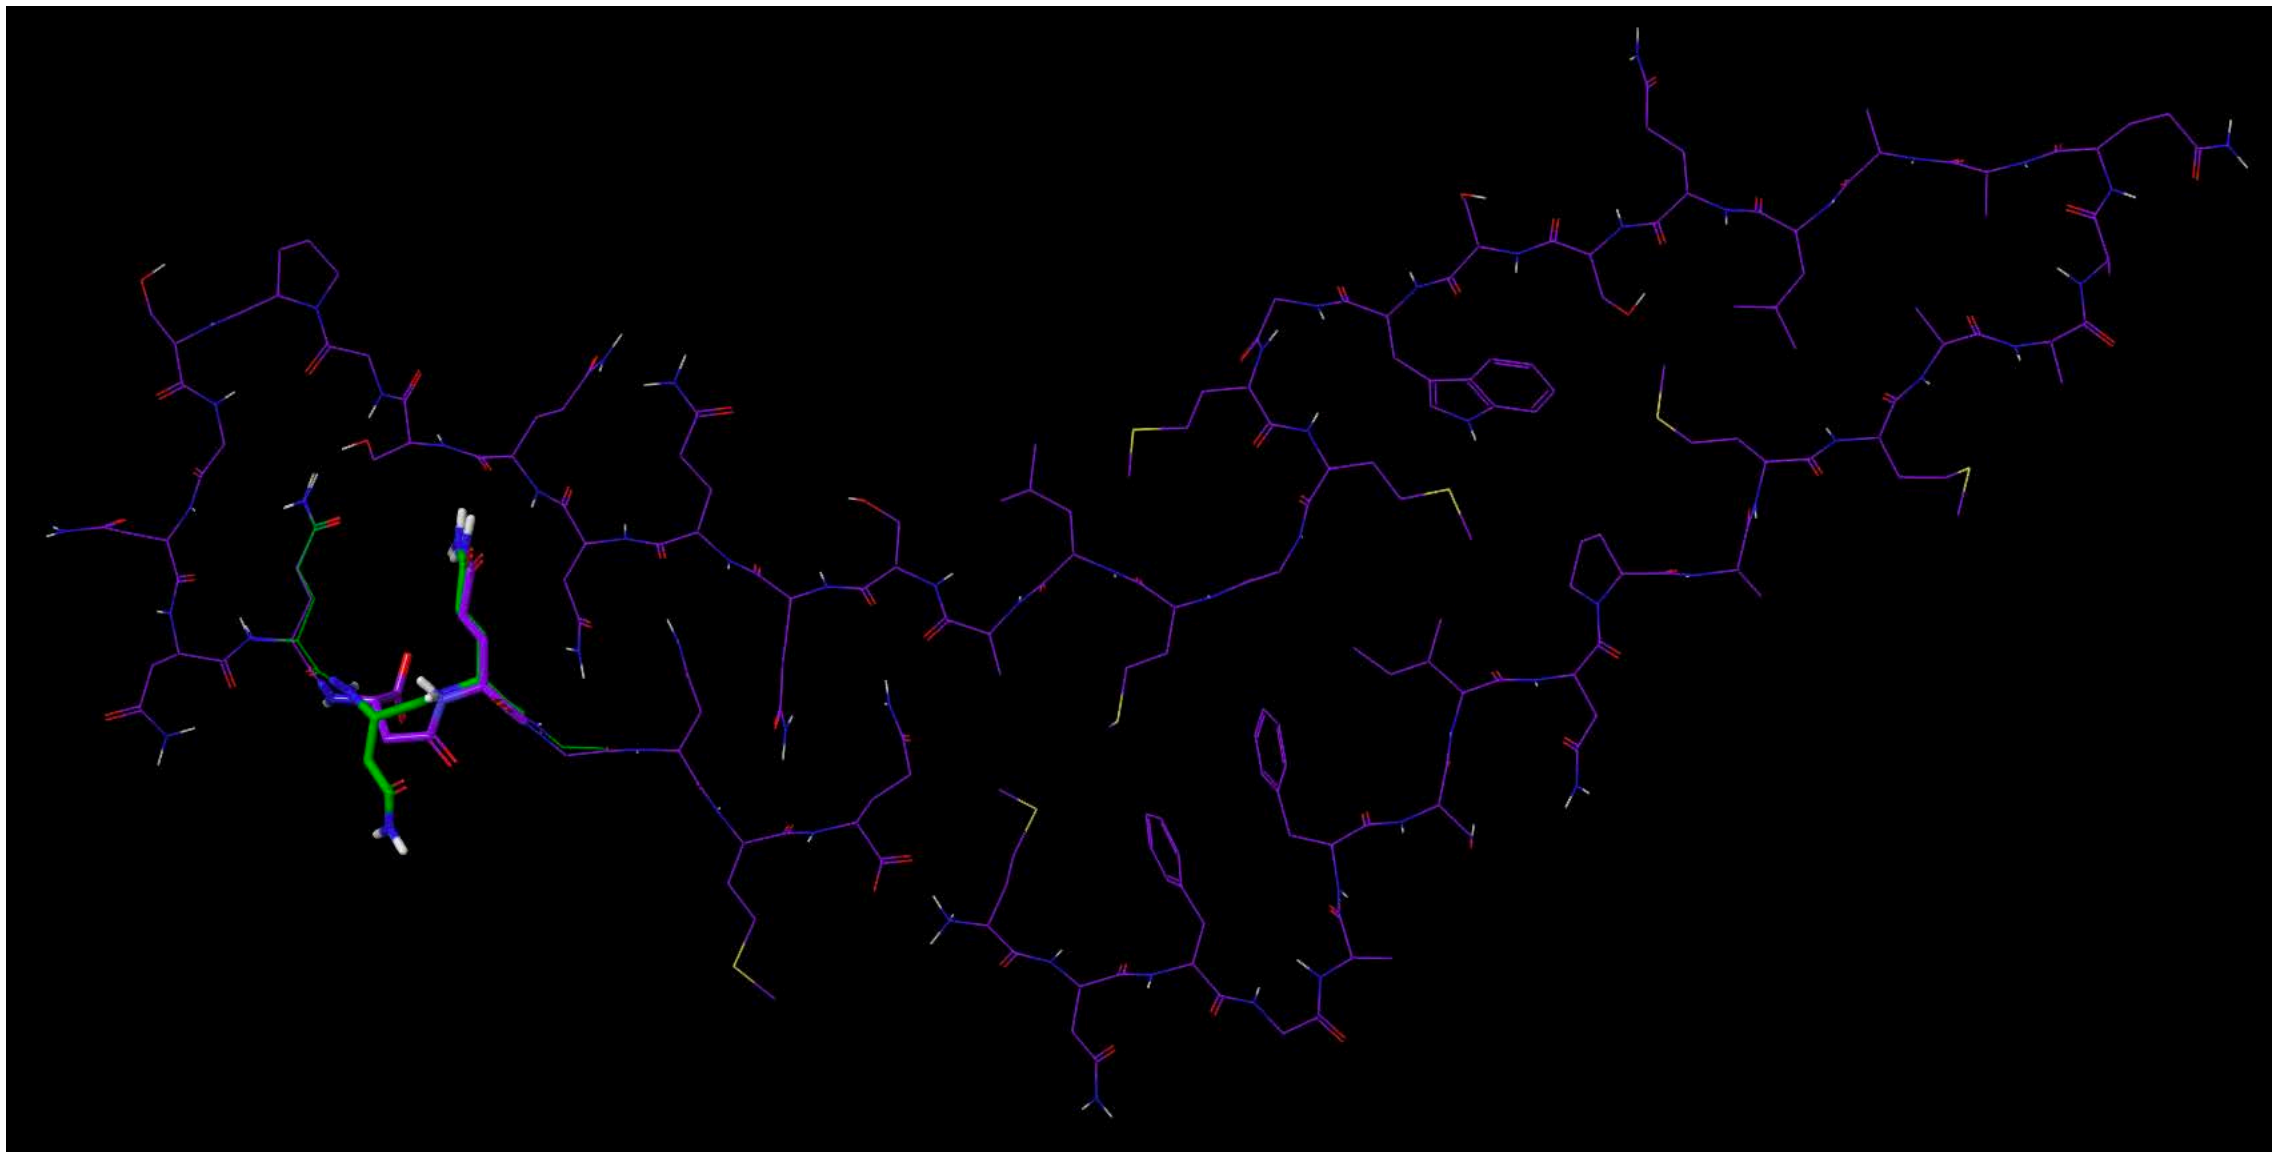

6N3A with isoaspartate 355 (**N**): -1723.5

6N3A

MNFGAFSINPAMMAAAQAALQSSWGMMGMLASQQNQSGPSGNNQNQGNMQ

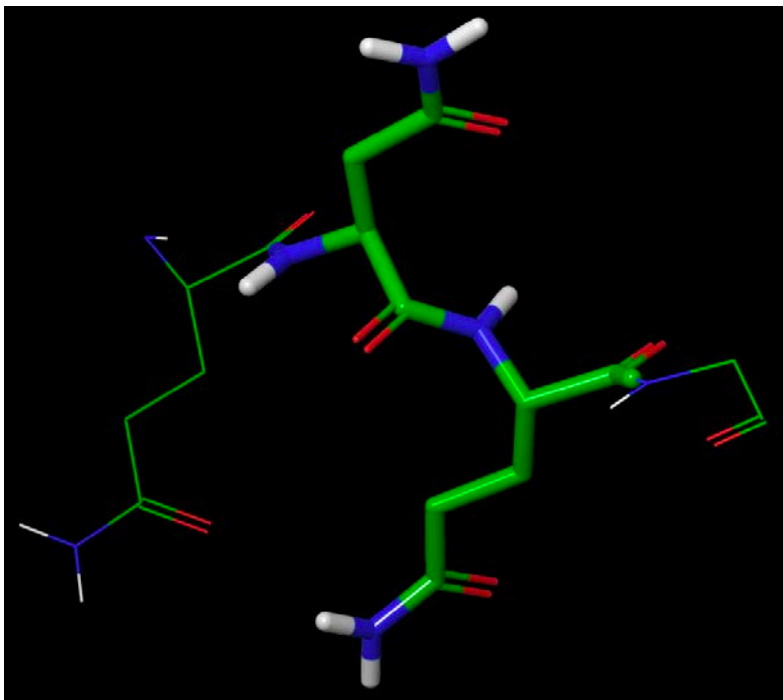

6N3A: -1778.6

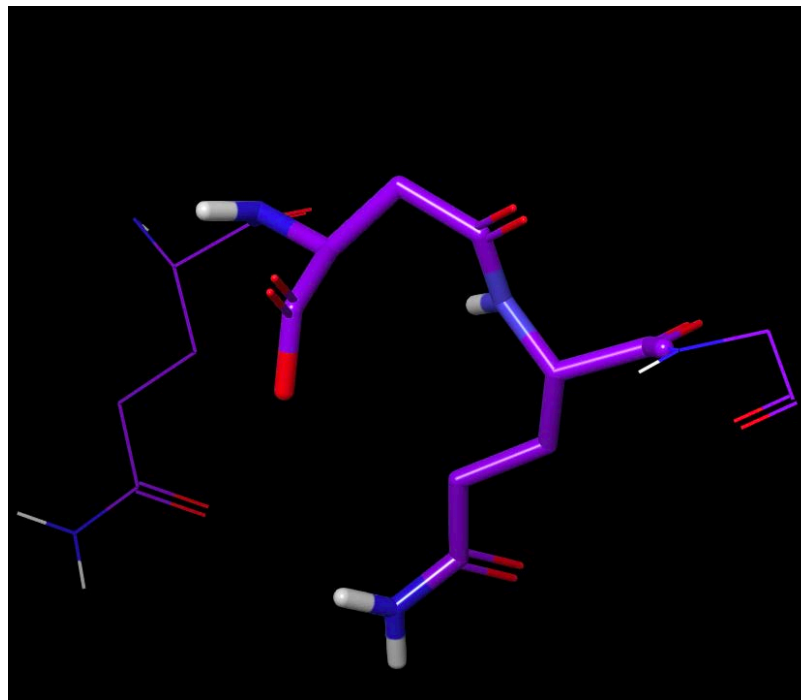

6N3A with isoaspartate 355 (N): -1723.5

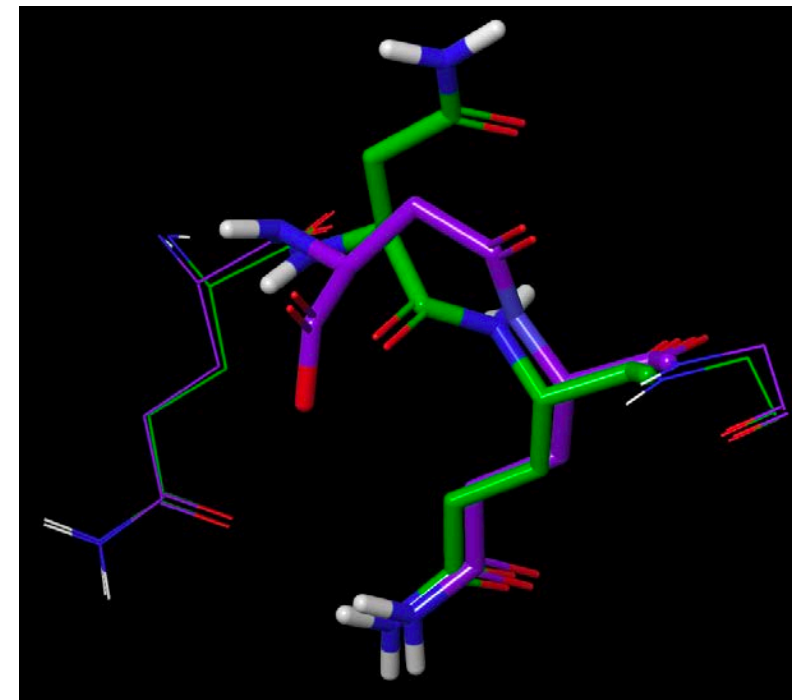

6N3A: -1778.6

MNFGAFSINPAMMAAAQAALQSSWGMMGMLASQQNQSGPSGNNQNQGNMQ

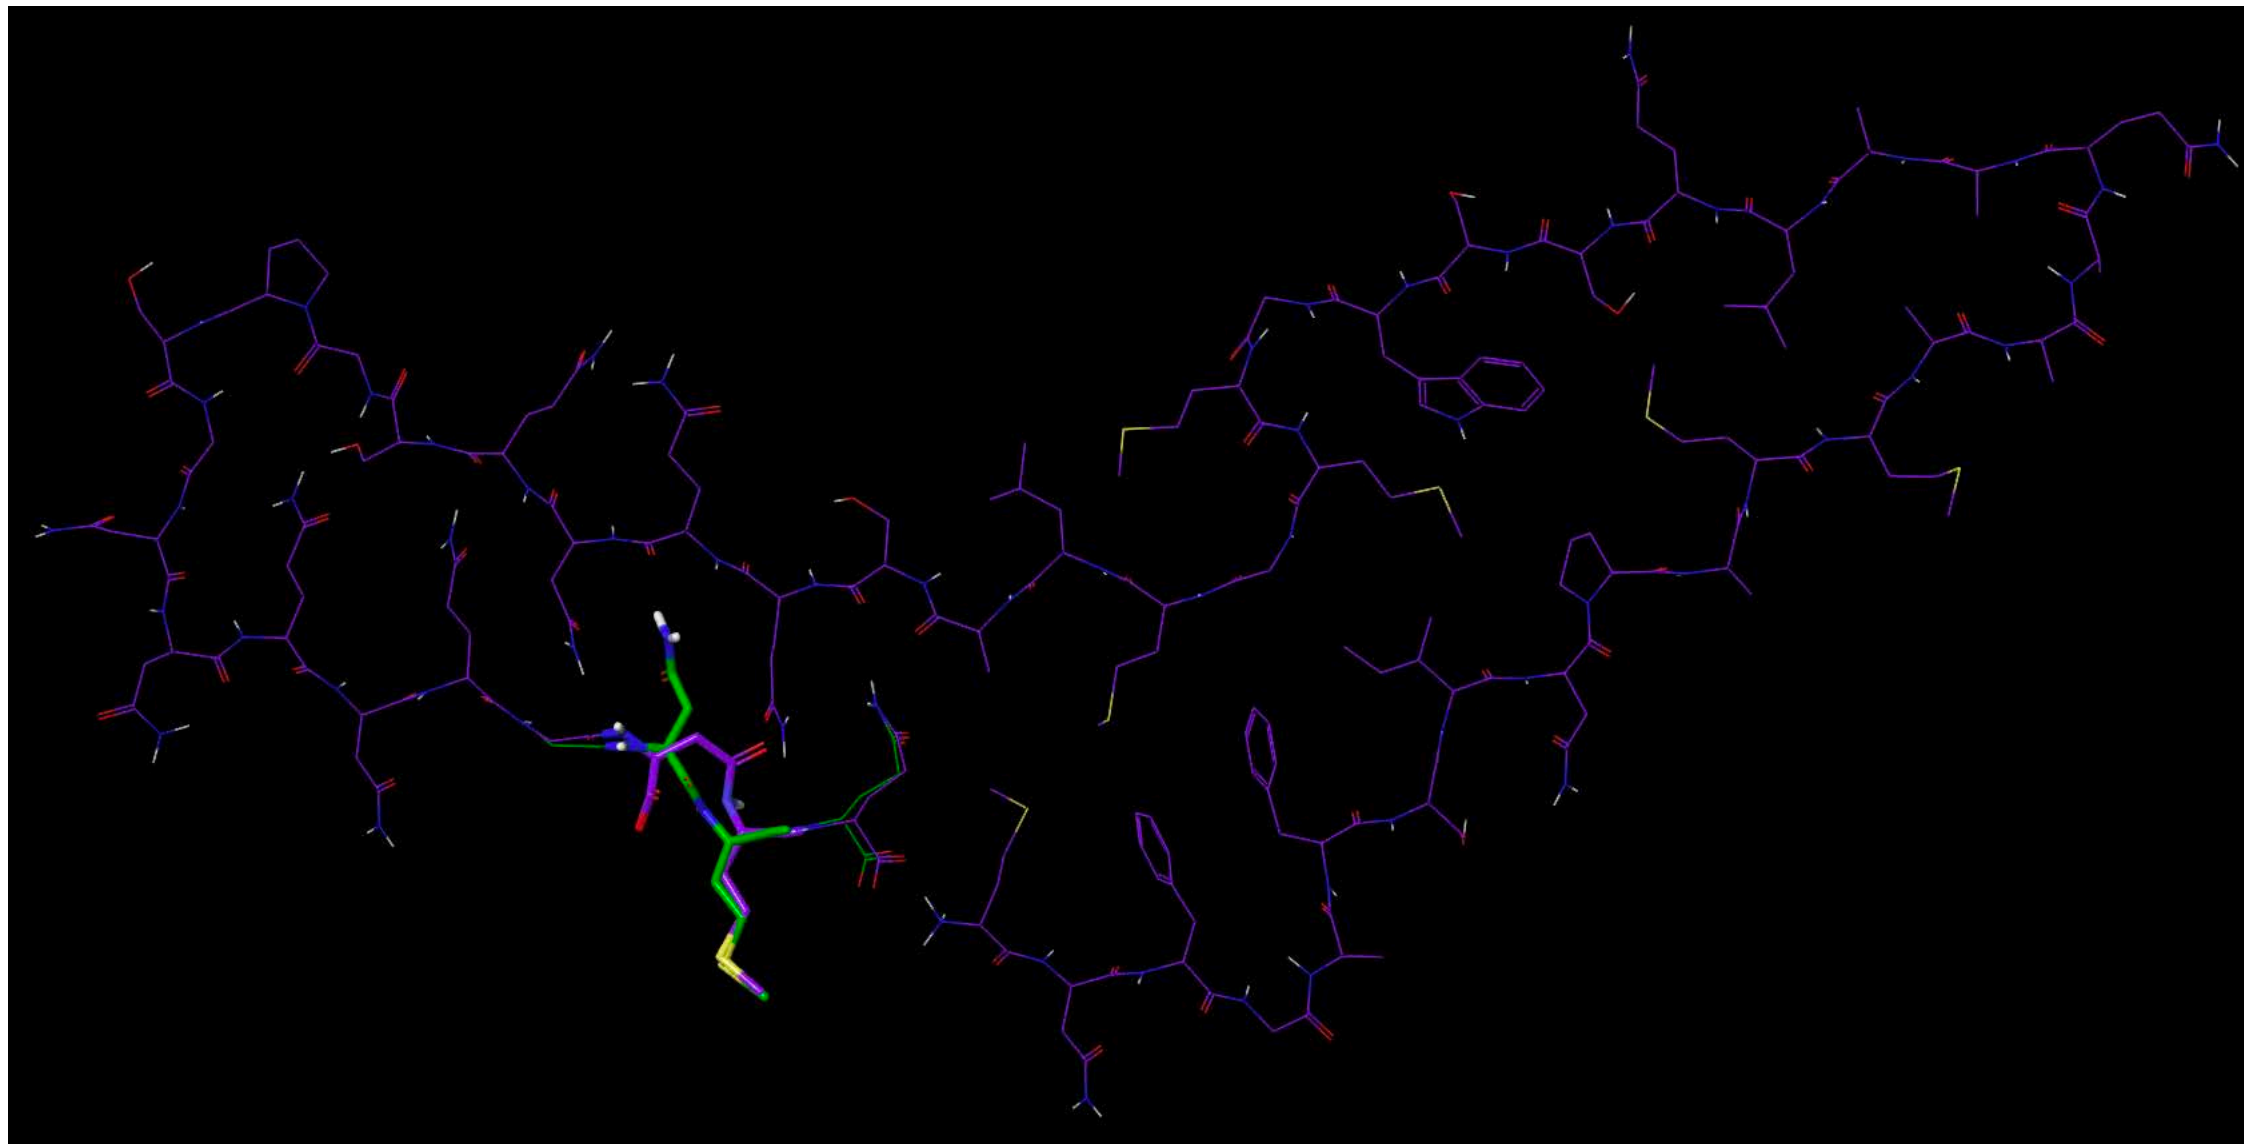

6N3A with isoaspartate 358 (**N**): -1693.4

MNFGAFSINPAMMAAAQAALQSSWGMMGLASQQNQSGPSGNNQNGNQ

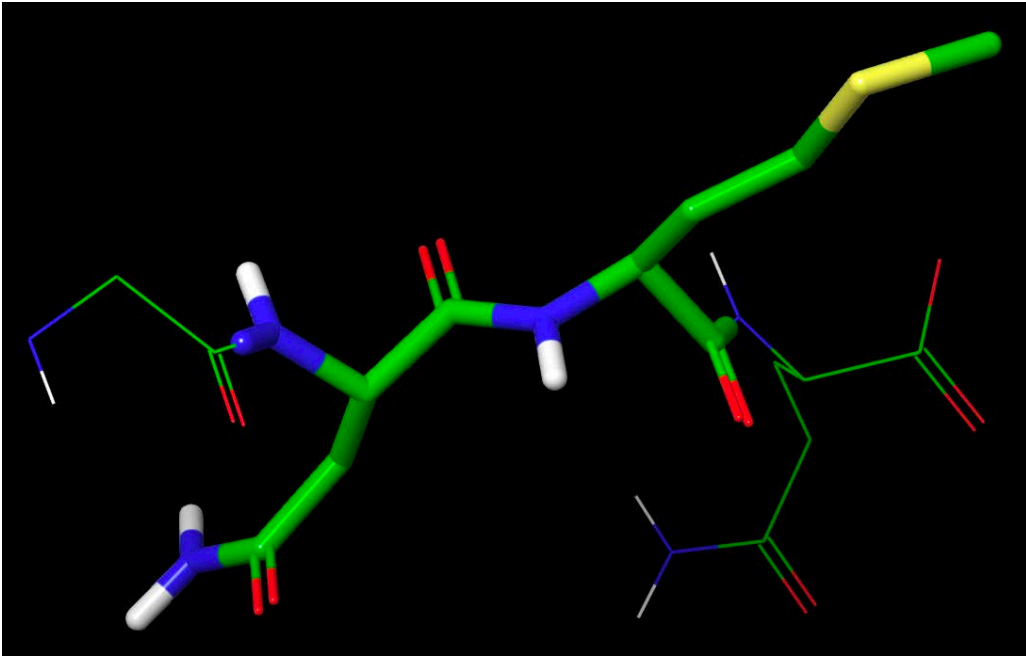

6N3A: -1778.6

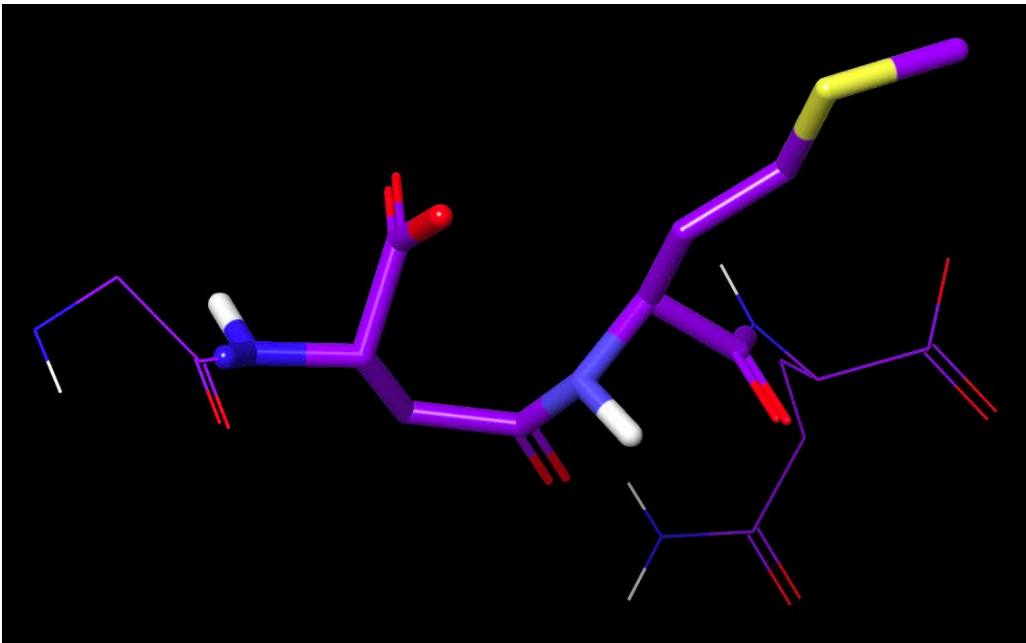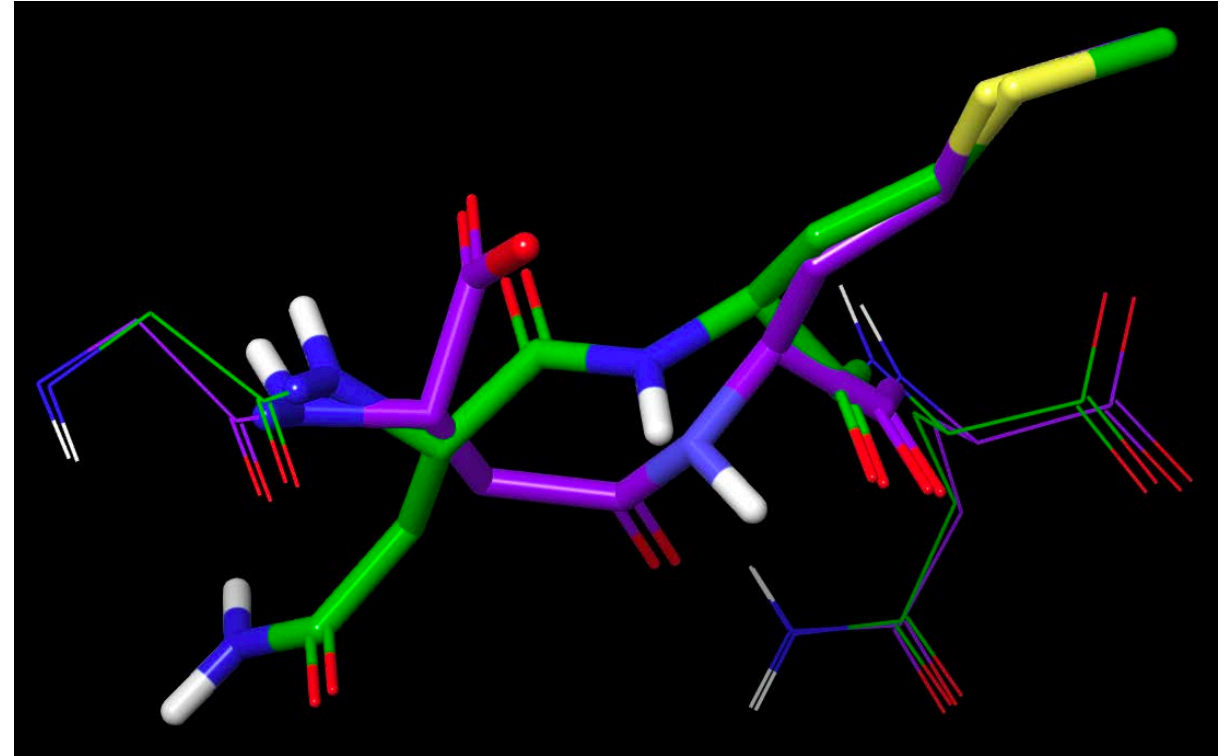

6N3A with isoaspartate 358 (N): -1693.4

6N3A: -1778.6

6N3A all sites

MNFGAFSINPAMMAAAQAALQSSWGMMGMLASQQNQSGPSGNNQNQGNMQ

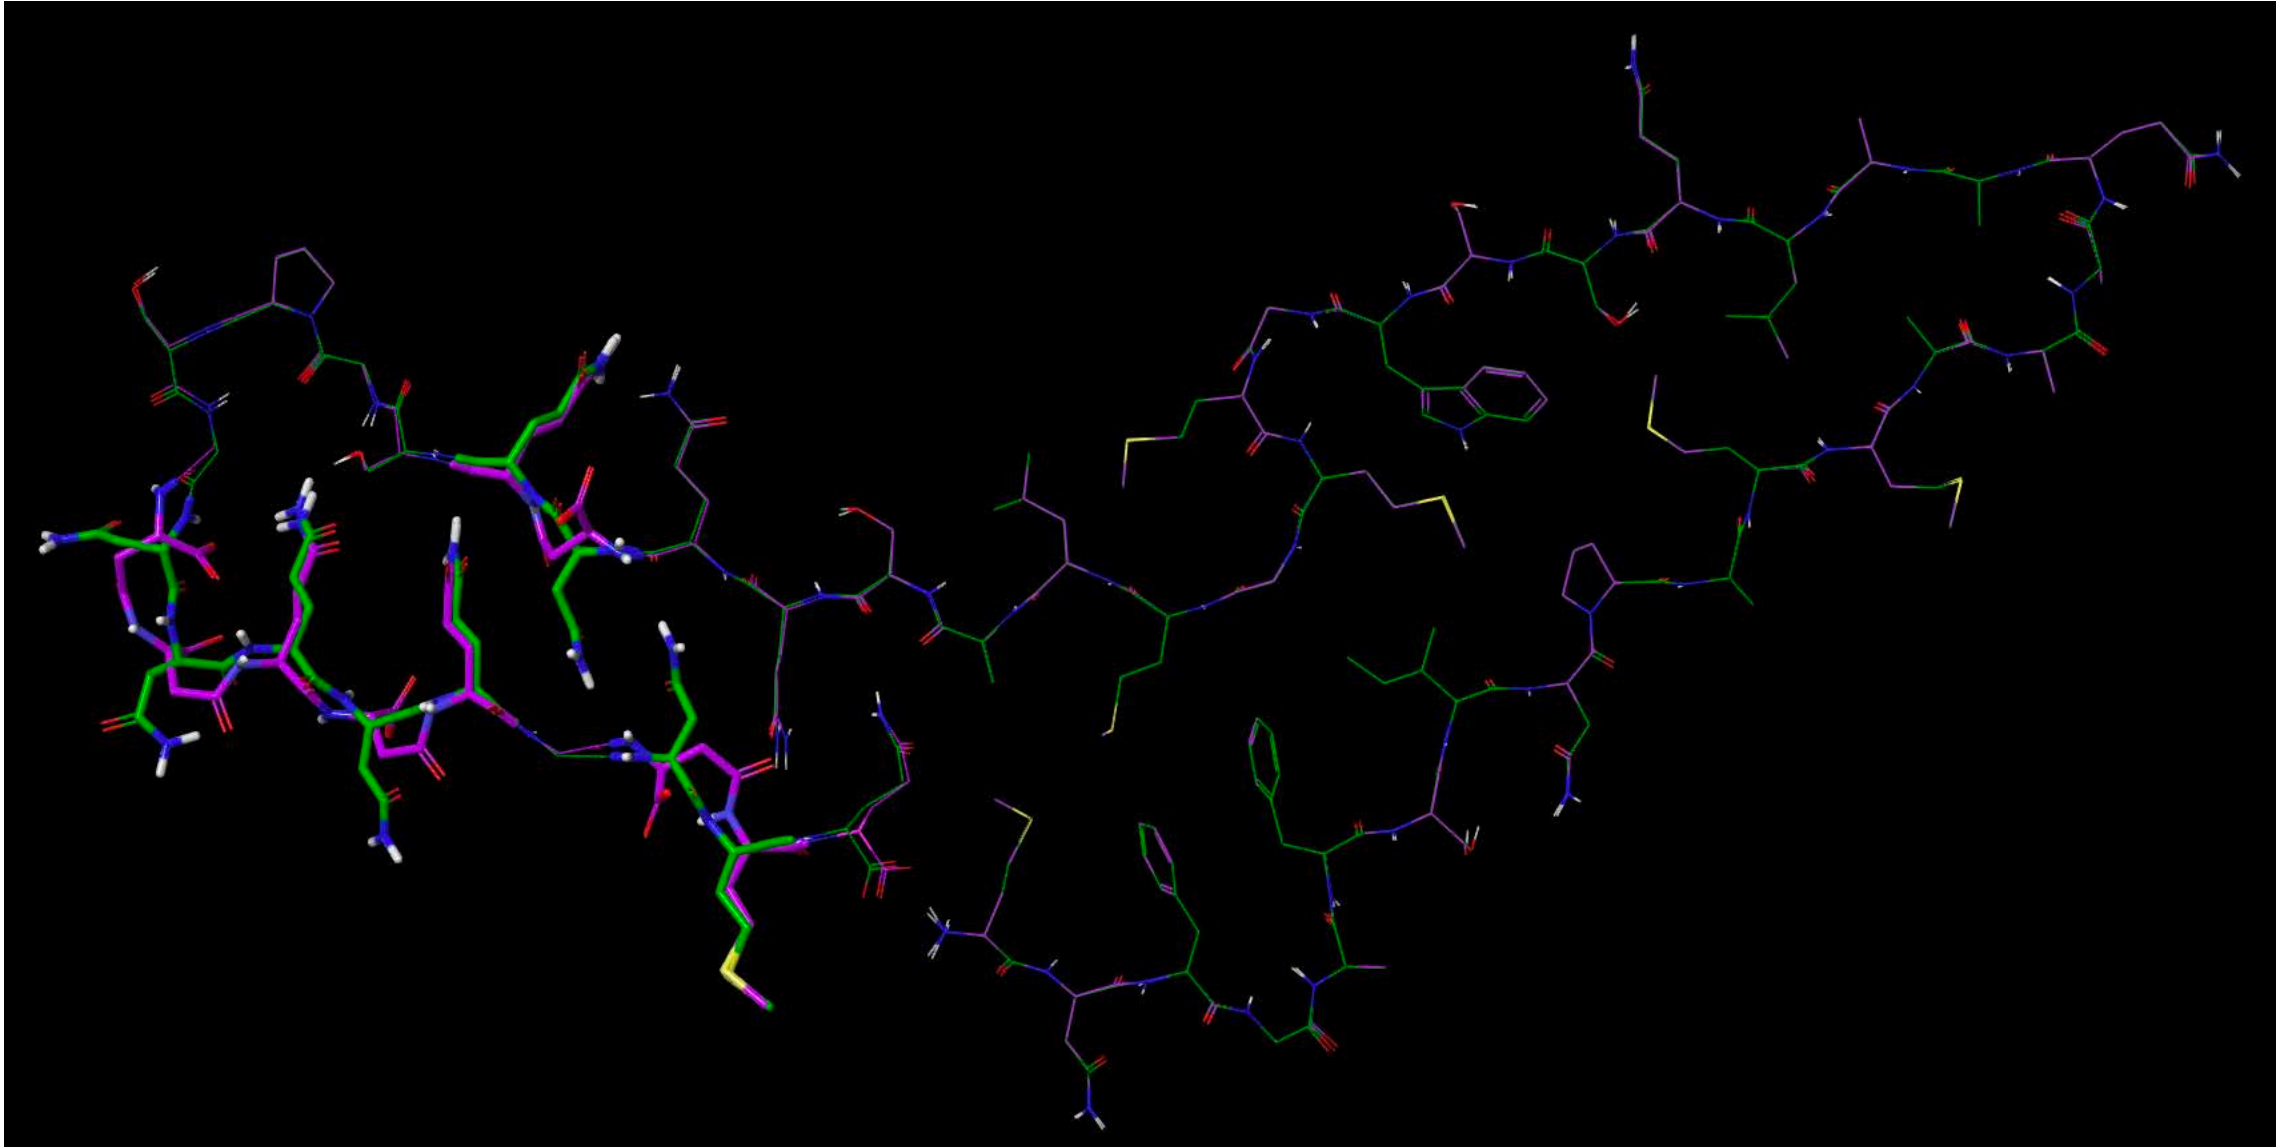

6N3A with all isoaspartate: -1360.0

6N3A all sites

MNFGAFSINPAMMAAAQAALQSSWGMMGLASQQNQSGPSGNNQNGNMQ

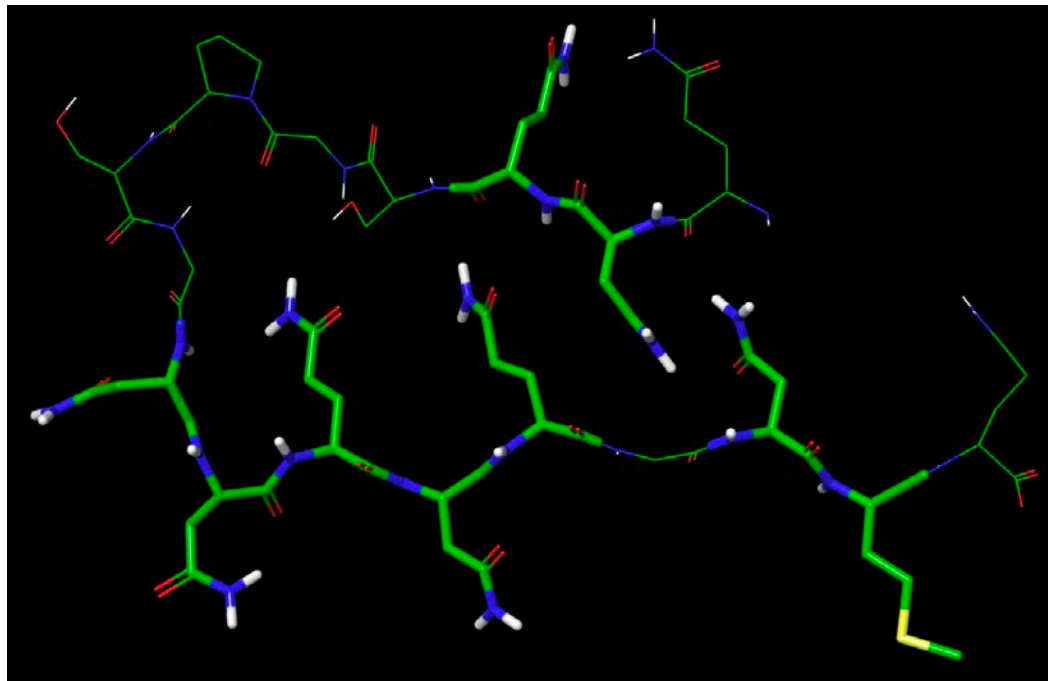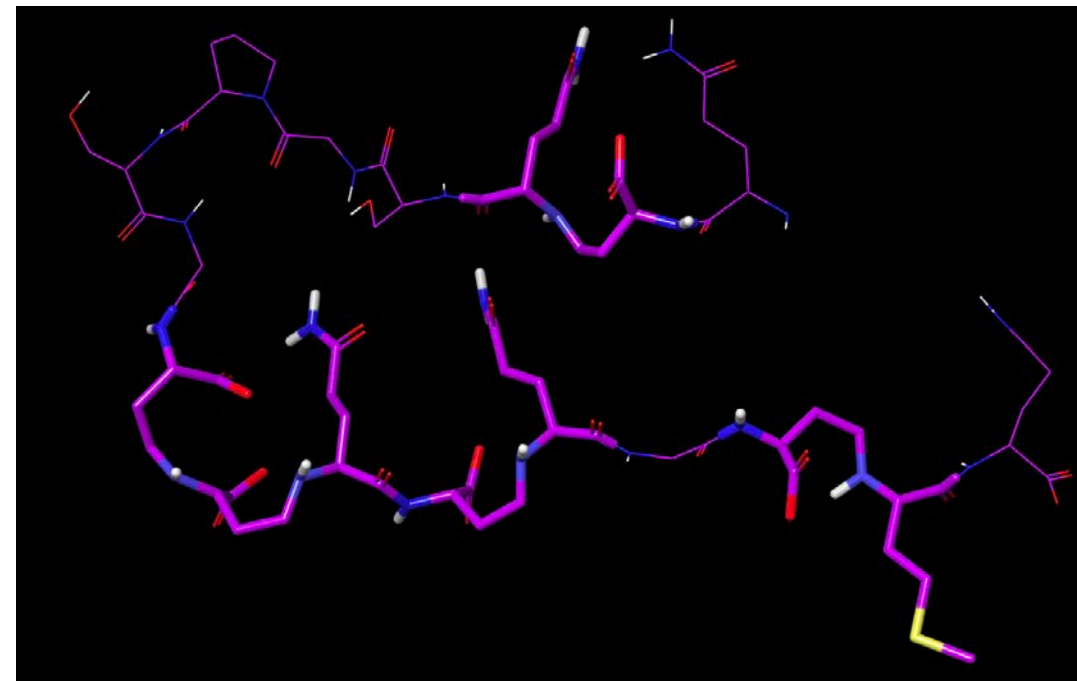

6N3A: -1778.6

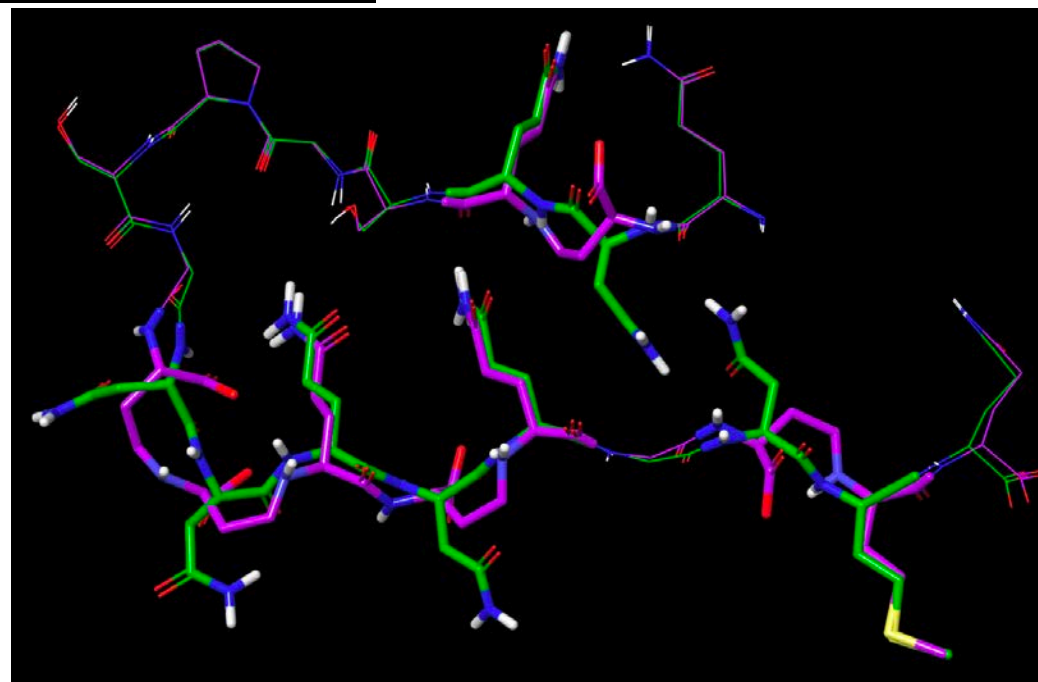

6N3A with all isoaspartate: -1360.0

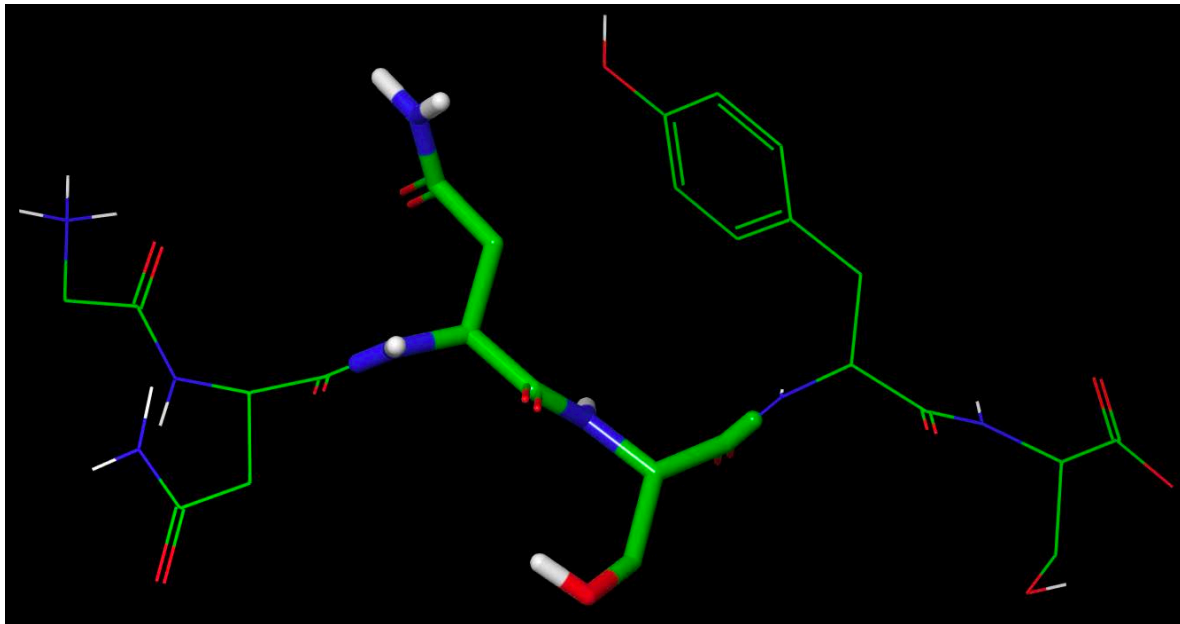

**GNN**SYS

**5WIA: -251.4**

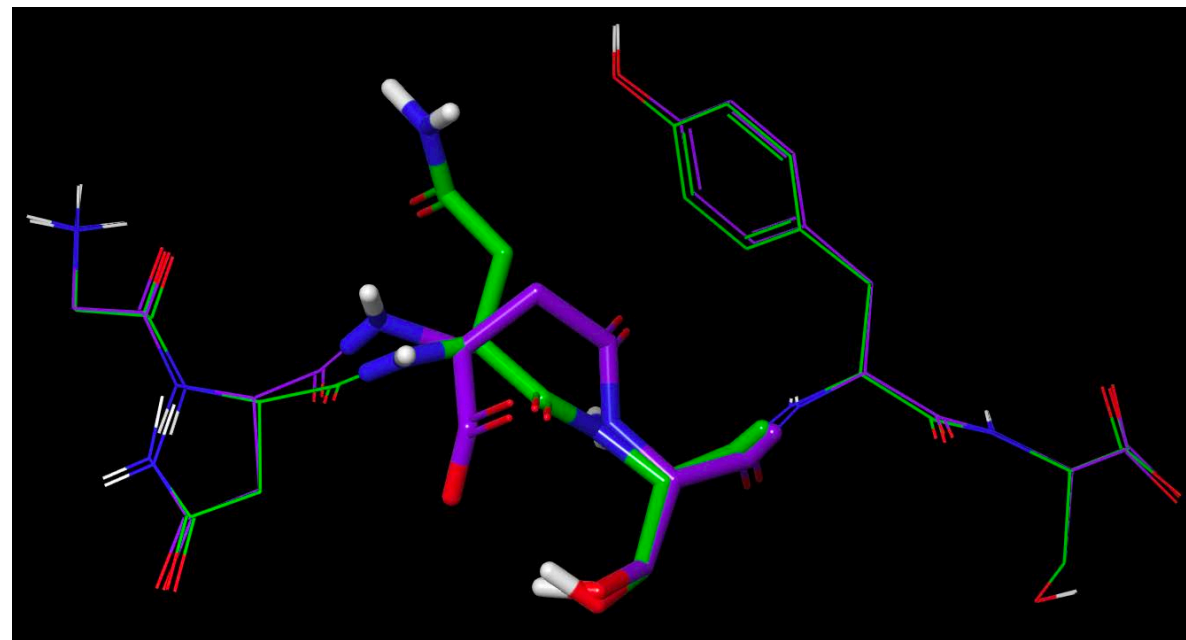

**5WIA with isoaspartate: -59.5**

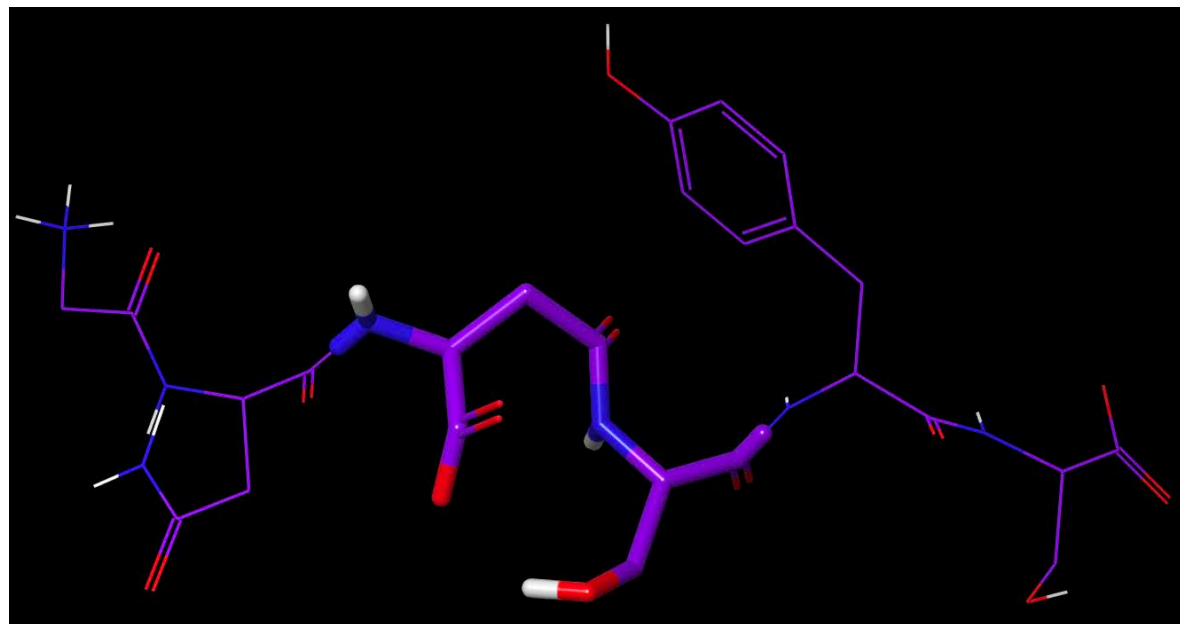



**GNN**SYS

**5WIA: -251.4**

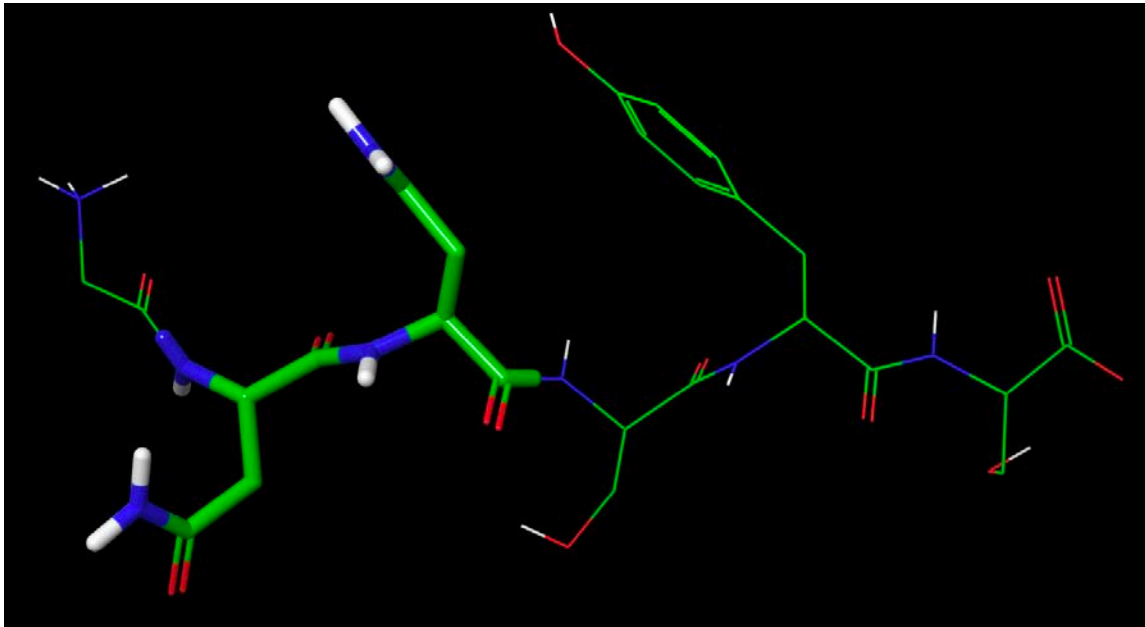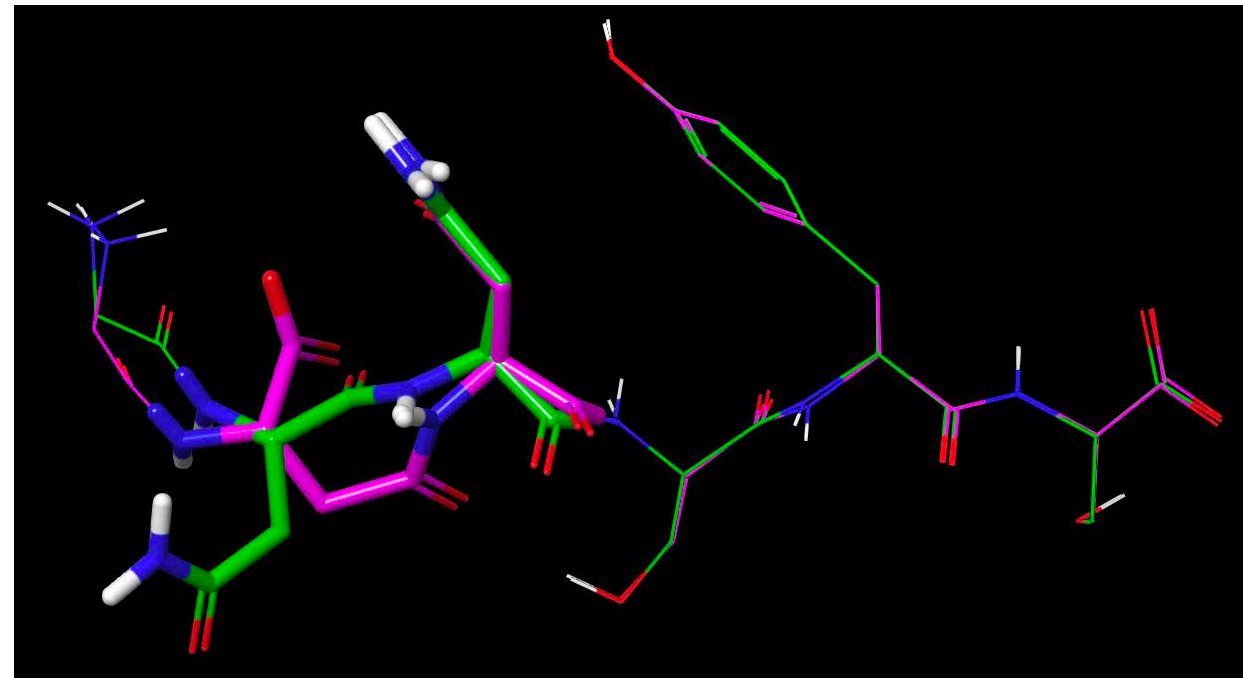

**5WIA with isoaspartate 371: -130.0**

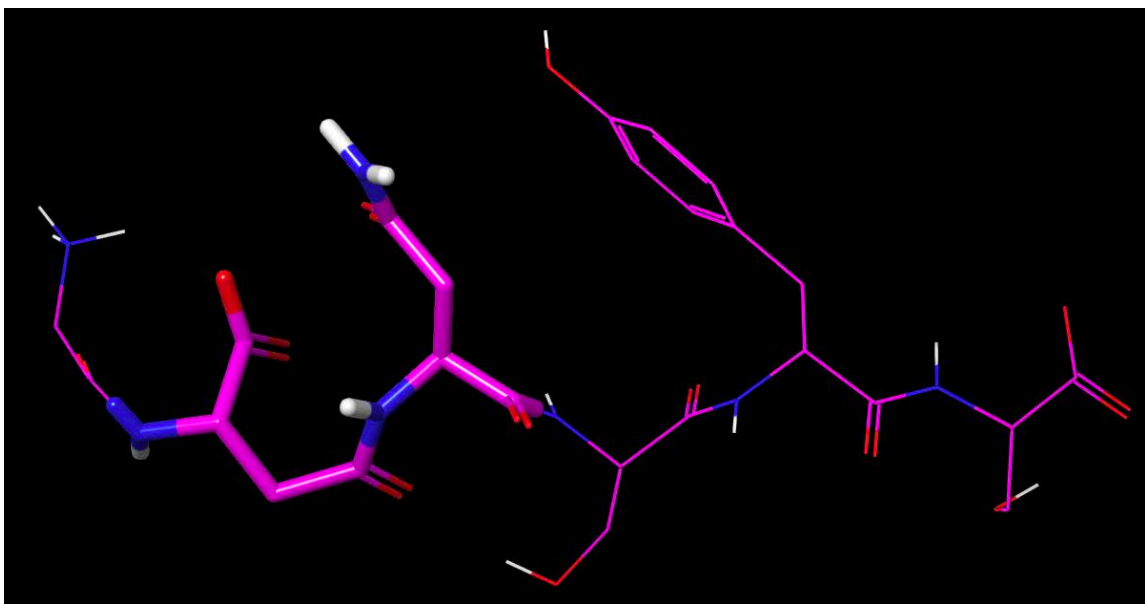

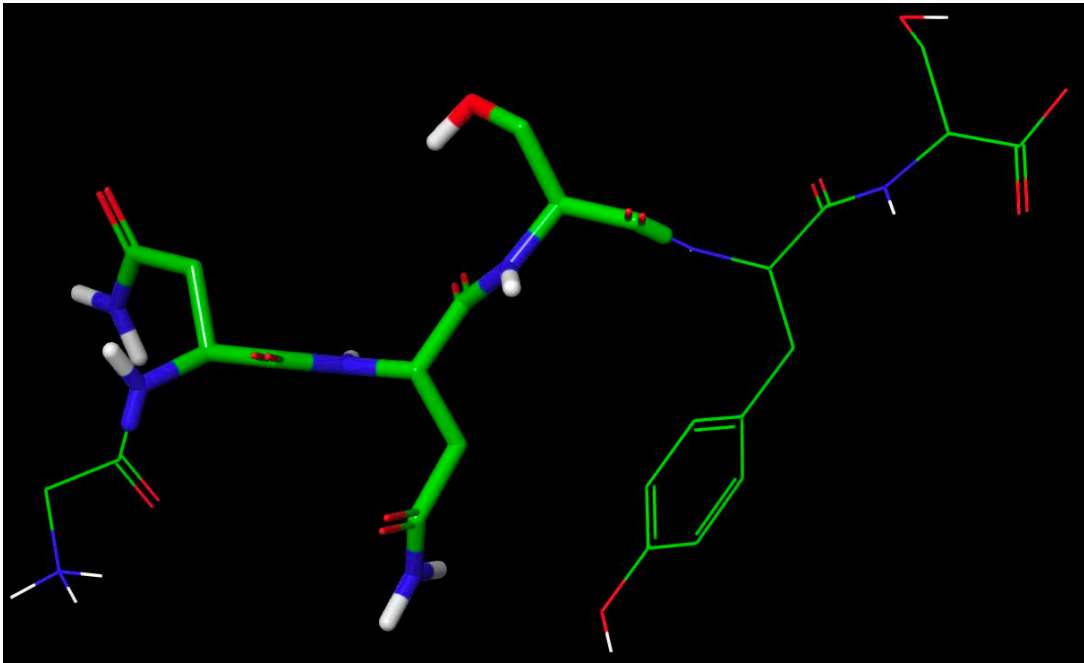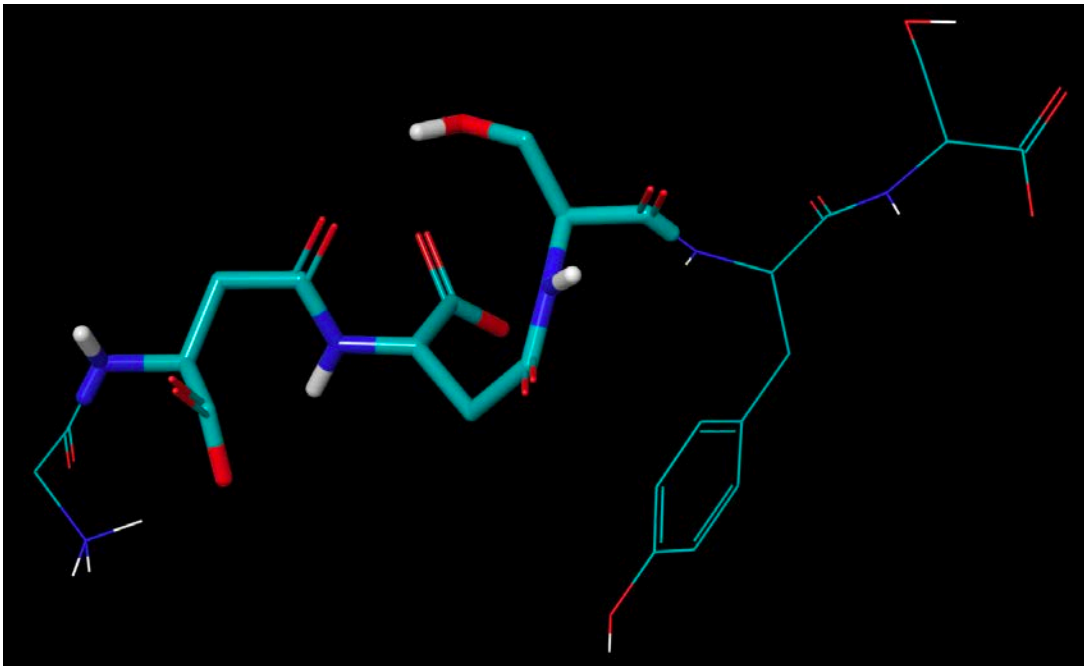

**GNN**SYS

**5WIA: -251.4**

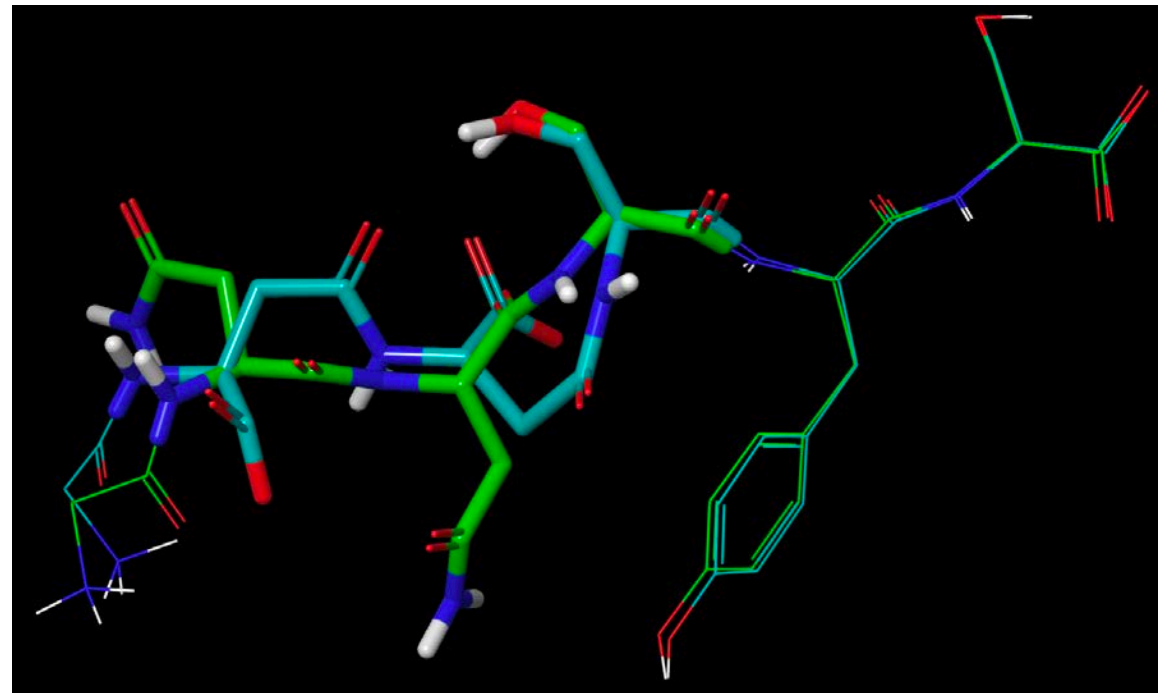

**5WIA with isoaspartate 370 and 371: +141.3**

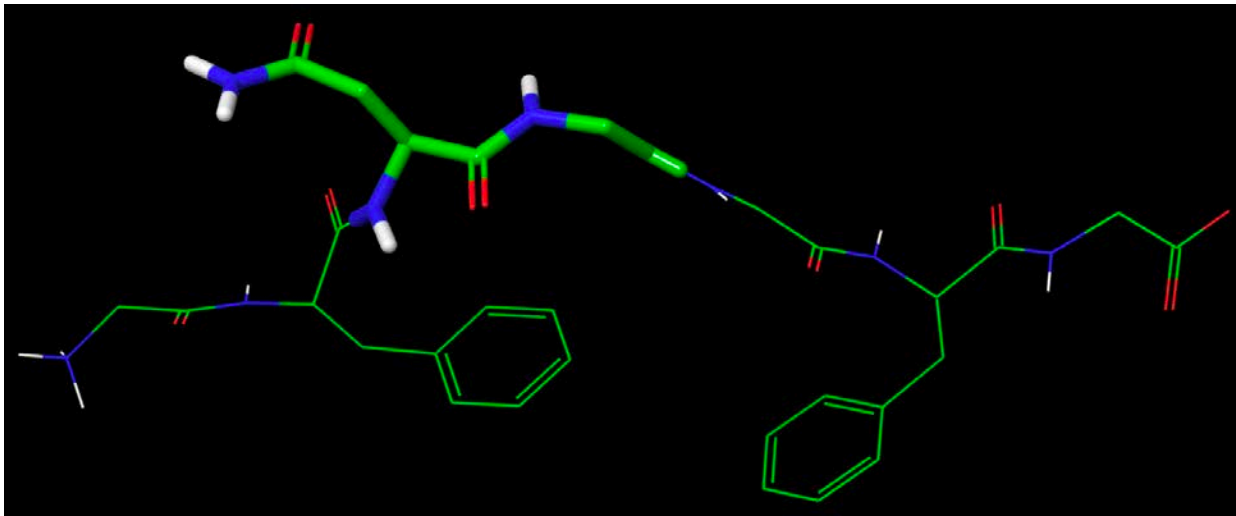

**GFNGGFG**

**5WIQ: -227.3**

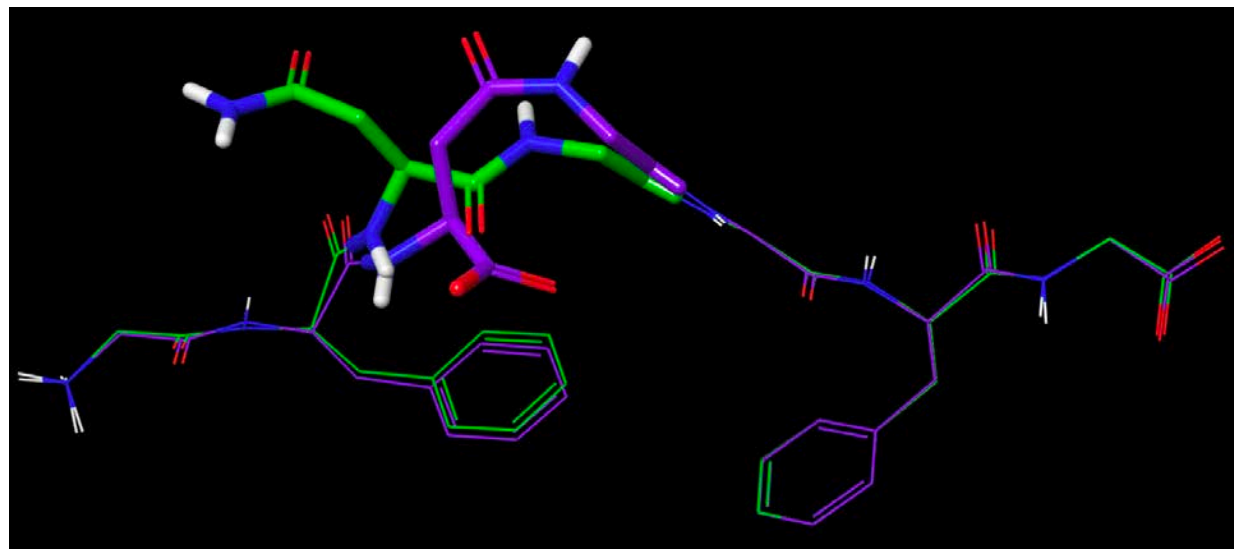

**5WIQ with isoaspartate: -138.8**

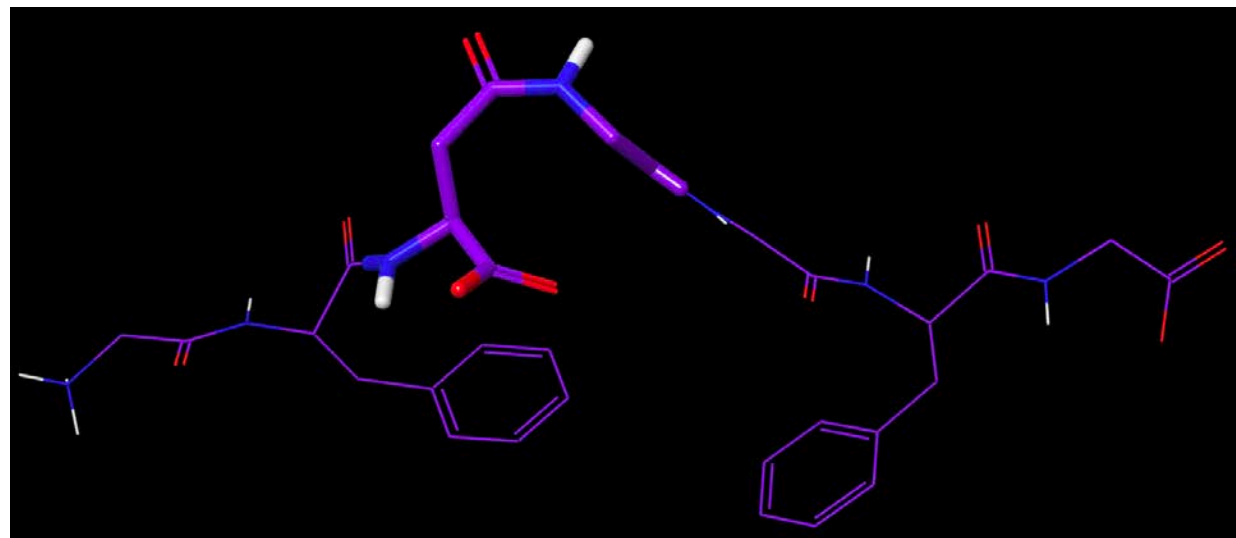

Supplement: 41467_2024_48488_MOESM4_ESM.pdf [file 41467_2024_48488_MOESM4_ESM.pdf]
