# Supplementary material for: TDP-43 proteinopathy in ALS is triggered by loss of ASRGL1 and associated with HML-2 expression
Source: PubMed Central journal article supplement (PMC11099023; doi:10.1038/s41467-024-48488-7), 2024-05-16

Corresponding author(s): Avindra NathLast updated by author(s): Marta Garcia Montojo

## Reporting Summary

Nature Portfolio wishes to improve the reproducibility of the work that we publish. This form provides structure for consistency and transparency in reporting. For further information on Nature Portfolio policies, see our [Editorial Policies](#) and the [Editorial Policy Checklist](#).

Please do not complete any field with "not applicable" or n/a. Refer to the help text for what text to use if an item is not relevant to your study.

For final submission: please carefully check your responses for accuracy; you will not be able to make changes later.

### Statistics

For all statistical analyses, confirm that the following items are present in the figure legend, table legend, main text, or Methods section.

- | n/a                                 | Confirmed                                                                                                                                                                                                                                                                                      |
|-------------------------------------|------------------------------------------------------------------------------------------------------------------------------------------------------------------------------------------------------------------------------------------------------------------------------------------------|
| <input type="checkbox"/>            | <input checked="" type="checkbox"/> The exact sample size ( $n$ ) for each experimental group/condition, given as a discrete number and unit of measurement                                                                                                                                    |
| <input type="checkbox"/>            | <input checked="" type="checkbox"/> A statement on whether measurements were taken from distinct samples or whether the same sample was measured repeatedly                                                                                                                                    |
| <input type="checkbox"/>            | <input checked="" type="checkbox"/> The statistical test(s) used AND whether they are one- or two-sided<br><i>Only common tests should be described solely by name; describe more complex techniques in the Methods section.</i>                                                               |
| <input type="checkbox"/>            | <input checked="" type="checkbox"/> A description of all covariates tested                                                                                                                                                                                                                     |
| <input type="checkbox"/>            | <input checked="" type="checkbox"/> A description of any assumptions or corrections, such as tests of normality and adjustment for multiple comparisons                                                                                                                                        |
| <input type="checkbox"/>            | <input checked="" type="checkbox"/> A full description of the statistical parameters including central tendency (e.g. means) or other basic estimates (e.g. regression coefficient) AND variation (e.g. standard deviation) or associated estimates of uncertainty (e.g. confidence intervals) |
| <input type="checkbox"/>            | <input checked="" type="checkbox"/> For null hypothesis testing, the test statistic (e.g. $F$ , $t$ , $r$ ) with confidence intervals, effect sizes, degrees of freedom and $P$ value noted<br><i>Give <math>P</math> values as exact values whenever suitable.</i>                            |
| <input checked="" type="checkbox"/> | <input type="checkbox"/> For Bayesian analysis, information on the choice of priors and Markov chain Monte Carlo settings                                                                                                                                                                      |
| <input type="checkbox"/>            | <input checked="" type="checkbox"/> For hierarchical and complex designs, identification of the appropriate level for tests and full reporting of outcomes                                                                                                                                     |
| <input type="checkbox"/>            | <input checked="" type="checkbox"/> Estimates of effect sizes (e.g. Cohen's $d$ , Pearson's $r$ ), indicating how they were calculated                                                                                                                                                         |

Our web collection on [statistics for biologists](#) contains articles on many of the points above.

### Software and code

Policy information about [availability of computer code](#)

|                 |                                                                                                                                                                                                                                                                                                                                                                                                 |
|-----------------|-------------------------------------------------------------------------------------------------------------------------------------------------------------------------------------------------------------------------------------------------------------------------------------------------------------------------------------------------------------------------------------------------|
| Data collection | Illumina HiSeq 2500, Cell Ranger v6.0, Leica Bond-MAX, Axio Imager.Z2, Thermo Scientific Orbitrap Lumos, Applied Biosystems QuantStudio 6 Flex, Cytation 5, Via7.                                                                                                                                                                                                                               |
| Data analysis   | Trimmomatic, Spliced Transcripts Alignment to a Reference (STAR), Cell Ranger v6.0, ACTIONet R package, batchelor R package, limma R package, Aperio, Gen5 Image Prime, ZEN 2, NGOME-Lite, JPred, Basic Local Alignment Search Tool (BLAST), Schrodinger Suites, ClusPro 2.0, Mascot Distiller, Mascot Daemon (2.6.0), GraphPad Prism, Image J, Molecular Devices MetaXpress Neurite Outgrowth. |

For manuscripts utilizing custom algorithms or software that are central to the research but not yet described in published literature, software must be made available to editors and reviewers. We strongly encourage code deposition in a community repository (e.g. GitHub). See the Nature Portfolio [guidelines for submitting code & software](#) for further information.

### Data

Policy information about [availability of data](#)

All manuscripts must include a [data availability statement](#). This statement should provide the following information, where applicable:

- Accession codes, unique identifiers, or web links for publicly available datasets
- A description of any restrictions on data availability
- For clinical datasets or third party data, please ensure that the statement adheres to our [policy](#)

The datasets generated during current study have been deposited in the Figshare database under accession "TDP-43 proteinopathy in ALS is triggered by loss of ASRGL1 and associated with HML-2 expression". Public databases have been used for sequence alignment of proteins (PDB, Sprout Human database, Uniprot) and nucleic acids (GRCh38), protein interactions (BioGRID), and gene ontology (Gene Ontology (GO) Consortium). Source data are provided with this paper as Supplementary Data 1. RNA sequencing data was obtained from the ALS Consortium of the New York Genome Center and would available upon request: <https://www.nygenome.org/contact/>.

## Research involving human participants, their data, or biological material

Policy information about studies with [human participants or human data](#). See also policy information about [sex, gender \(identity/presentation\), and sexual orientation](#) and [race, ethnicity and racism](#).

|                                                                    |                                                                                                                                                                                                                                                                                                                                                                                                                                                                                                                                                                                                                                                                                                                                                                                                                                                                                                                                                                                                                                                                                                                                                                                                      |
|--------------------------------------------------------------------|------------------------------------------------------------------------------------------------------------------------------------------------------------------------------------------------------------------------------------------------------------------------------------------------------------------------------------------------------------------------------------------------------------------------------------------------------------------------------------------------------------------------------------------------------------------------------------------------------------------------------------------------------------------------------------------------------------------------------------------------------------------------------------------------------------------------------------------------------------------------------------------------------------------------------------------------------------------------------------------------------------------------------------------------------------------------------------------------------------------------------------------------------------------------------------------------------|
| Reporting on sex and gender                                        | Sex of donors of samples analyzed was always reported (sex assigned at birth). Comparison between ALS samples and controls was always sex matched. See Supplementary tables 1, 2 and 3.                                                                                                                                                                                                                                                                                                                                                                                                                                                                                                                                                                                                                                                                                                                                                                                                                                                                                                                                                                                                              |
| Reporting on race, ethnicity, or other socially relevant groupings | Race and ethnicity have not been reported, since it was not available for most samples.                                                                                                                                                                                                                                                                                                                                                                                                                                                                                                                                                                                                                                                                                                                                                                                                                                                                                                                                                                                                                                                                                                              |
| Population characteristics                                         | Demographic characteristics of donors of samples analyzed are described in Supplementary tables 1, 2 and 3.                                                                                                                                                                                                                                                                                                                                                                                                                                                                                                                                                                                                                                                                                                                                                                                                                                                                                                                                                                                                                                                                                          |
| Recruitment                                                        | Brain samples: kindly provided by the institutions described in Supplementary Table 2 following institutions' approvals and Material Transfer Agreements. Patient characteristics and sources of the samples are described in Supplementary Table 2.<br>Induced pluripotent Stem Cells: Induced pluripotent stem cells (iPSCs) lines were generated from deidentified PBMCs from healthy human donors (Supplementary Table 3) and sporadic ALS patients using a Sendai virus method, as previously described. The lines were generated by the National Heart, Lung, and Blood Institute iPSCs core faculty at the National Institutes of Health (NIH). Samples were obtained under protocols 15-N-0125 (ALS patients) and 03-AG-0325 (Normal controls) following approval by the Institutional Review Board of NIH.<br>RNA sequencing data: RNA sequencing data was acquired from the New York Genome Center (NYGC) Consortium Database ( <a href="https://www.nygenome.org/contact/">https://www.nygenome.org/contact/</a> ) following institution's approval and Material Transfer Agreement. Demographic characteristics of the ALS patients and controls are described in Supplementary Table 1. |
| Ethics oversight                                                   | The lines were generated by the National Heart, Lung, and Blood Institute iPSCs core faculty at the National Institutes of Health (NIH). Samples for the generation of Induced pluripotent stem cell lines were obtained under protocols 15-N-0125 (ALS patients) and 03-AG-0325 (Normal controls) following approval by the Institutional Review Board of NIH.<br>RNA sequencing data: RNA sequencing data was acquired from the New York Genome Center (NYGC) Consortium Database ( <a href="https://www.nygenome.org/contact/">https://www.nygenome.org/contact/</a> ) following institution's approval and Material Transfer Agreement.                                                                                                                                                                                                                                                                                                                                                                                                                                                                                                                                                          |

Note that full information on the approval of the study protocol must also be provided in the manuscript

## Field-specific reporting

Please select the one below that is the best fit for your research. If you are not sure, read the appropriate sections before making your selection.

Life sciences  Behavioural & social sciences  Ecological, evolutionary & environmental sciences

For a reference copy of the document with all sections, see [nature.com/documents/nr-reporting-summary-flat.pdf](https://www.nature.com/documents/nr-reporting-summary-flat.pdf)

## Life sciences study design

All studies must disclose on these points even when the disclosure is negative.

|                 |                                                                                                                                                                                                                                                                                                                                                                                                                                                                                                                                                                                                                                                                                                                                                                                                                                                                                                          |
|-----------------|----------------------------------------------------------------------------------------------------------------------------------------------------------------------------------------------------------------------------------------------------------------------------------------------------------------------------------------------------------------------------------------------------------------------------------------------------------------------------------------------------------------------------------------------------------------------------------------------------------------------------------------------------------------------------------------------------------------------------------------------------------------------------------------------------------------------------------------------------------------------------------------------------------|
| Sample size     | For all in vitro experiments a minimum of 3 independent experimental replicates was performed, which is standard in the field. Sample size for RNA sequencing analysis was determined by the data availability the the NY Genome Center but it meets or exceeds standards in the field (391 samples: 218 males and 173 females).<br>Sample size for immunohistochemistry (IH), western blot (WB) and PCR experiments with brain samples from ALS and controls was chosen according to or exceeding standards in the field: 16 samples for IH, 40 for WB and 39 for PCR.<br>For the experiments with motor neurons derived from induced pluripotent stem cells lines, we used 12 lines, which also meets and/or exceeds standards in the field. For the in vivo experiments we used 10 animals (5 per group), which is also standard in the field. Only female mice were used due to limited sample size. |
| Data exclusions | For each in vitro experiment there was a setting up of the protocol. Several trials were performed during this phase whose results were not included in the analysis. Once a protocol was determined to be optimal, the experiment was replicated independently at least 3 times. No data were excluded in the analysis of those replicates.                                                                                                                                                                                                                                                                                                                                                                                                                                                                                                                                                             |
| Replication     | For the in vitro experiments we always performed between 3 and 7 independent replicates. The results of all replicates were averaged for the final result.                                                                                                                                                                                                                                                                                                                                                                                                                                                                                                                                                                                                                                                                                                                                               |
| Randomization   | Randomization for in vitro experiments involving cell cultures was not needed. The same cell line was used for the different treatments that were compared in each experiment (transfection with plasmids or peptides or treatment with reagents). For analysis of clinical samples, ALS samples and controls were not randomized; they were paired by sex and age. In microscopy random fields were chosen for counting cells. For in vivo experiments, mice were randomly assigned to receive either AAV vectors encoding ASRGL1 shRNAs or scrambled shRNAs.                                                                                                                                                                                                                                                                                                                                           |
| Blinding        | Investigators were not blinded for some of the experiments: RNA seq analysis, in vitro experiments involving western blotting, since the same investigator performed each experiment from group allocation to data collection. However, measurements were always confirmed by a second investigator. For experiments involving cellular or tissue staining of human clinical samples or mice, the staining was performed by a non-blinded investigator but the analysis was performed by two independent blinded investigators.                                                                                                                                                                                                                                                                                                                                                                          |

## Behavioural & social sciences study design

All studies must disclose on these points even when the disclosure is negative.

|                   |                |
|-------------------|----------------|
| Study description | Not applicable |
| Research sample   | Not applicable |
| Sampling strategy | Not applicable |
| Data collection   | Not applicable |
| Timing            | Not applicable |
| Data exclusions   | Not applicable |
| Non-participation | Not applicable |
| Randomization     | Not applicable |

# Ecological, evolutionary & environmental sciences study design

All studies must disclose on these points even when the disclosure is negative.

|                          |                |
|--------------------------|----------------|
| Study description        | Not applicable |
| Research sample          | Not applicable |
| Sampling strategy        | Not applicable |
| Data collection          | Not applicable |
| Timing and spatial scale | Not applicable |
| Data exclusions          | Not applicable |
| Reproducibility          | Not applicable |
| Randomization            | Not applicable |
| Blinding                 | Not applicable |

Did the study involve field work?  Yes  No

## Field work, collection and transport

|                        |                |
|------------------------|----------------|
| Field conditions       | Not applicable |
| Location               | Not applicable |
| Access & import/export | Not applicable |
| Disturbance            | Not applicable |

## Reporting for specific materials, systems and methods

We require information from authors about some types of materials, experimental systems and methods used in many studies. Here, indicate whether each material, system or method listed is relevant to your study. If you are not sure if a list item applies to your research, read the appropriate section before selecting a response.

### Materials & experimental systems

|                                     |                                                                 |
|-------------------------------------|-----------------------------------------------------------------|
| n/a                                 | Included in the study                                           |
| <input type="checkbox"/>            | <input checked="" type="checkbox"/> Antibodies                  |
| <input type="checkbox"/>            | <input checked="" type="checkbox"/> Eukaryotic cell lines       |
| <input checked="" type="checkbox"/> | <input type="checkbox"/> Palaeontology and archaeology          |
| <input type="checkbox"/>            | <input checked="" type="checkbox"/> Animals and other organisms |
| <input checked="" type="checkbox"/> | <input type="checkbox"/> Clinical data                          |
| <input checked="" type="checkbox"/> | <input type="checkbox"/> Dual use research of concern           |
| <input checked="" type="checkbox"/> | <input type="checkbox"/> Plants                                 |

### Methods

|                                     |                                                 |
|-------------------------------------|-------------------------------------------------|
| n/a                                 | Included in the study                           |
| <input checked="" type="checkbox"/> | <input type="checkbox"/> ChIP-seq               |
| <input checked="" type="checkbox"/> | <input type="checkbox"/> Flow cytometry         |
| <input checked="" type="checkbox"/> | <input type="checkbox"/> MRI-based neuroimaging |

## Antibodies

| Antibody                    | Vendor/Source   | Product #  | Host Ig class | Clone      | Assay          |
|-----------------------------|-----------------|------------|---------------|------------|----------------|
| ASRGL1                      | Atlas           | HPA055572  | Rabbit IgG    | Polyclonal | WB/ IHC/IF/PLA |
| ASRGL1                      | Atlas           | HPA029725  | Rabbit IgG    | Polyclonal | WB             |
| TDP-43                      | Encor           | MCA-3H8    | Mouse IgG1    | MCA-3H8    | IF mice        |
| TDP-43 C-terminal           | Cell Signaling  | 3448       | Rabbit IgG    | Polyclonal | WB/ IP         |
| TDP-43                      | Proteintech     | 66734-1-Ig | Mouse IgG1    | Polyclonal | PLA            |
| Phospho-TDP43               | Millipore       | MABN14     | Rat IgG2a     | 1D3        | WB             |
| Ubiquitin                   | Cell signaling  | 3933       | Rabbit IgG    | Polyclonal | WB             |
| UNC13A                      | Proteintech     | 55053-1-AP | Rabbit IgG    | Polyclonal | WB             |
| XBPI                        | Abcam           | Ab37152    | Rabbit IgG    | Polyclonal | WB             |
| NeuN                        | Millipore Sigma | MAB377     | Mouse IgG     | A60        | IF             |
| CTIP2                       | Abcam           | ab18465    | Rat IgG       | 25B6       | IF mice        |
| Anti-rat-HRP                | ThermoFisher    | 31470      | Goat IgG      | Polyclonal | WB             |
| Anti-mouse-HRP secondary    | Cell Signaling  | 7076       | Horse IgG     | Polyclonal | WB             |
| Anti-rabbit-HRP secondary   | Cell Signaling  | 7074       | Goat IgG      | Polyclonal | WB             |
| Anti-mouse Alexa-fluor-488  | ThermoFisher    | A28175     | Goat IgG      | Polyclonal | IF             |
| Anti-mouse Alexa-fluor-594  | ThermoFisher    | A-11005    | Goat IgG      | Polyclonal | IF             |
| Anti-rabbit Alexa-fluor-488 | ThermoFisher    | A-11008    | Goat IgG      | Polyclonal | IF             |
| Anti-rabbit Alexa-fluor-594 | ThermoFisher    | A-11012    | Goat IgG      | Polyclonal | IF             |
| Anti-rat Alexa-fluor-633    | ThermoFisher    | A-21094    | Goat IgG      | Polyclonal | IF             |

Validation Antibodies were validated by our laboratory and the manufacturing companies. Citations of the use of the antibodies can be found in the listed websites:

ASRG1 (Atlas, HPA055572, HPA029725): Validation in human brains and cell lines by IF, IHC (Orthogonal validation of protein expression using IHC by comparing independent antibodies targeting different epitopes of the protein. Validated against independent antibody) and WB (Genetic validation in WB by siRNA knockdown. Recombinant expression validation in WB using target protein overexpression). Confirmed homology with mouse protein. <https://www.atlasantibodies.com/products/primary-antibodies/triple-a-polyclonals/anti-asrg1-antibody-hpa029725-100ul/?language=en>. They were validated by us by shRNA silencing and protein overexpression (Supplementary figure 10).

TDP-43 (Encor MCA-3H8): Validated by IF and WB in human and mouse. <https://encorbio.com/product/mca-3h8/>

TDP-43 C-terminal (Cell signaling 3448): Validated by IF and WB in human: <https://www.cellsignal.com/products/primary-antibodies/tdp43-g400-antibody/3448>

TDP-43 Proteintech (66734-1-Ig): Validated by IF and WB in human. <https://www.ptglab.com/products/TDP-43-Antibody-66734-1-Ig.htm>

Phospho-TDP43 (Millipore, MABN14): Validation by WB in human.

Ubiquitin (Cell Signaling, 3933): Validation by WB in human. <https://www.cellsignal.com/products/primary-antibodies/ubiquitin-antibody/3933>

UNC13A (Proteintech, 55053-1-AP): Validation by WB in human. <https://www.ptglab.com/products/UNC13A-Antibody-55053-1-AP.htm>

XBP1 (Abcam, Ab37152): Validation by WB in human. <https://www.abcam.com/products/primary-antibodies/xbp1-antibody-ab37152.html#lb>

NeuN (Millipore, MAB377): Validation by IF in human. [https://www.emdmillipore.com/US/en/product/Anti-NeuN-Antibody-clone-A60,MM\\_NF-MAB377?ReferrerURL=https%3A%2F%2Fwww.google.com%2F](https://www.emdmillipore.com/US/en/product/Anti-NeuN-Antibody-clone-A60,MM_NF-MAB377?ReferrerURL=https%3A%2F%2Fwww.google.com%2F)

CTIP2 (Abcam, ab18465): Validation by IF in human. <https://www.abcam.com/products/primary-antibodies/ctip2-antibody-25b6-ab18465.html#lb>

## Eukaryotic cell lines

Policy information about [cell lines and Sex and Gender in Research](#)

|                                                                   |                                                                                                                                                                                                                                                                                                                                                                                                                                                                            |
|-------------------------------------------------------------------|----------------------------------------------------------------------------------------------------------------------------------------------------------------------------------------------------------------------------------------------------------------------------------------------------------------------------------------------------------------------------------------------------------------------------------------------------------------------------|
| Cell line source(s)                                               | Cell lines used in this study were obtained from ATCC (HEK293T), As One International (mouse neural stem cells modified to express GFP (Catalogue number: MUBNF-01101), or generated in house from induced pluripotent stem cell lines : neural stem cells (from a male healthy donor), neural stem cells modified to express tdTomato (from a male healthy donor), motor neurons derived from iPSc lines from 4 male/ 2 female ALS patients and 4 male/ 2female controls. |
| Authentication                                                    | In house produced cell lines were authenticated (by IF, RNAseq, PCR), not the purchased ones.                                                                                                                                                                                                                                                                                                                                                                              |
| Mycoplasma contamination                                          | All cell lines were negative for mycoplasma contamination.                                                                                                                                                                                                                                                                                                                                                                                                                 |
| Commonly misidentified lines (See <a href="#">ICLAC</a> register) | No commonly misidentified cell lines were used in the study                                                                                                                                                                                                                                                                                                                                                                                                                |

## Palaeontology and Archaeology

|                     |                |
|---------------------|----------------|
| Specimen provenance | Not applicable |
| Specime deposition  | Not applicable |
| Dating methods      | Not applicable |

Tick this box to confirm that the raw and calibrated dates are available in the paper or in Supplementary Information.

Ethics oversight

Note that full information on the approval of the study protocol must also be provided in the manuscript.

## Animals and other research organisms

Policy information about [studies involving animals; ARRIVE guidelines](#) recommended for reporting animal research, and [Sex and Gender in Research](#)

|                         |                                                                                                                                                                                                                                                                                                                                                                                                                                    |
|-------------------------|------------------------------------------------------------------------------------------------------------------------------------------------------------------------------------------------------------------------------------------------------------------------------------------------------------------------------------------------------------------------------------------------------------------------------------|
| Laboratory animals      | 3-month-old adult female C57BL/6 mice were purchased from Jackson Laboratory (Bar Harbor, Maine) and maintained in our breeding colony. All experiments involving mice were performed according to the recommendations in the "Guide for the Care and Use of Laboratory Animals of the NIH". Mice were housed in a pathogen-free barrier facility with a 12-hour light/12-hour dark cycle and ad libitum access to food and water. |
| Wild animals            | No wild animals were used.                                                                                                                                                                                                                                                                                                                                                                                                         |
| Reporting on sex        | All mice were female                                                                                                                                                                                                                                                                                                                                                                                                               |
| Field-collected samples | The study did not involved samples collected from the filed                                                                                                                                                                                                                                                                                                                                                                        |
| Ethics oversight        | The study was approved by the NINDS/ NICD/ NCCIH Institutional Animal Care and Use Committee (Protocol number: 1331-20).<br>Note that full information on the approval of the study protocol must also be provided in the manuscript.                                                                                                                                                                                              |

## Clinical data

Policy information about [clinical studies](#)

All manuscripts should comply with the ICMJE [guidelines for publication of clinical research](#) and a completed [CONSORT checklist](#) must be included with all submissions.

|                             |                                                                                                                                               |
|-----------------------------|-----------------------------------------------------------------------------------------------------------------------------------------------|
| Clinical trial registration | The study did not involve a clinical trial.                                                                                                   |
| Study protocol              | The study did not involve a clinical trial.                                                                                                   |
| Data collection             | Diagnostic and demographic data of the brain samples analyzed were provided by the institutions donating the samples (Supplementary table 2). |
| Outcomes                    | The study did not involve clinical outcomes.                                                                                                  |

## Dual use research of concern

Policy information about [dual use research of concern](#) Not applicable

## Hazards

Could the accidental, deliberate or reckless misuse of agents or technologies generated in the work, or the application of information presented in the manuscript, pose a threat to:

| No                                  | Yes                                                 |
|-------------------------------------|-----------------------------------------------------|
| <input checked="" type="checkbox"/> | <input type="checkbox"/> Public health              |
| <input checked="" type="checkbox"/> | <input type="checkbox"/> National security          |
| <input checked="" type="checkbox"/> | <input type="checkbox"/> Crops and/or livestock     |
| <input checked="" type="checkbox"/> | <input type="checkbox"/> Ecosystems                 |
| <input checked="" type="checkbox"/> | <input type="checkbox"/> Any other significant area |

## Experiments of concern

Does the work involve any of these experiments of concern:

| No                                  | Yes                                                                                                  |
|-------------------------------------|------------------------------------------------------------------------------------------------------|
| <input checked="" type="checkbox"/> | <input type="checkbox"/> Demonstrate how to render a vaccine ineffective                             |
| <input checked="" type="checkbox"/> | <input type="checkbox"/> Confer resistance to therapeutically useful antibiotics or antiviral agents |
| <input checked="" type="checkbox"/> | <input type="checkbox"/> Enhance the virulence of a pathogen or render a nonpathogen virulent        |
| <input checked="" type="checkbox"/> | <input type="checkbox"/> Increase transmissibility of a pathogen                                     |
| <input checked="" type="checkbox"/> | <input type="checkbox"/> Alter the host range of a pathogen                                          |
| <input checked="" type="checkbox"/> | <input type="checkbox"/> Enable evasion of diagnostic/detection modalities                           |
| <input checked="" type="checkbox"/> | <input type="checkbox"/> Enable the weaponization of a biological agent or toxin                     |
| <input checked="" type="checkbox"/> | <input type="checkbox"/> Any other potentially harmful combination of experiments and agents         |

## Plants

Seed stocks Not applicable

Novel plant genotypes Not applicable

Authentication Not applicable

## ChIP-seq

### Data deposition

- Confirm that both raw and final processed data have been deposited in a public database such as [GEO](#).
- Confirm that you have deposited or provided access to graph files (e.g. BED files) for the called peaks.

Data access links  
*May remain private before publication.* Not applicable

Files in database submission Not applicable

Genome browser session  
(e.g. [UCSC](#)) Not applicable

### Methodology

Replicates Not applicable

Sequencing depth Not applicable

Antibodies Not applicable

Peak calling parameters Not applicable

Data quality Not applicable

Software

## Flow Cytometry

### Plots

Confirm that:

- The axis labels state the marker and fluorochrome used (e.g. CD4-FITC).
- The axis scales are clearly visible. Include numbers along axes only for bottom left plot of group (a 'group' is an analysis of identical markers).
- All plots are contour plots with outliers or pseudocolor plots.
- A numerical value for number of cells or percentage (with statistics) is provided.

### Methodology

Sample preparation

Instrument

Software

Cell population abundance

Gating strategy

- Tick this box to confirm that a figure exemplifying the gating strategy is provided in the Supplementary Information.

## Magnetic resonance imaging

### Experimental design

Design type

Design specifications

Behavioral performance measures

Imaging type(s)

Field strength

Sequence & imaging parameters

Area of acquisition

Diffusion MRI

Used

Not used

### Preprocessing

Preprocessing software

Normalization

Normalization template

Noise and artifact removal

Volume censoring

### Statistical modeling & inference

Model type and settings

Effect(s) tested

Specify type of analysis:  Whole brain  ROI-based  Both

Statistic type for inference

(See [Eklund et al. 2016](#))

Correction

## Models & analysis

n/a | Involved in the study

  Functional and/or effective connectivity  Graph analysis  Multivariate modeling or predictive analysis

Functional and/or effective connectivity

Graph analysis

Multivariate modeling and predictive analysis

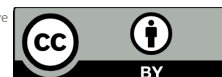

Supplement: 41467_2024_48488_MOESM6_ESM.pdf [file 41467_2024_48488_MOESM6_ESM.pdf]
