# Supplementary material for: TDP-43 proteinopathy in ALS is triggered by loss of ASRGL1 and associated with HML-2 expression
Source: PubMed Central journal article supplement (PMC11099023; doi:10.1038/s41467-024-48488-7), 2024-05-16
Supplement: 41467_2024_48488_MOESM3_ESM.pdf [file 41467_2024_48488_MOESM3_ESM.pdf]

## **Description of Additional Supplementary Files**

**File Name: Supplementary Data 1**

**Description:** Structural analysis of isoaspartate formation in TDP-43.

**File Name: Supplementary Movie 1**

**Description:** Interaction of TDP-43 and ASRGL1 in the perinuclear region.
